# Supplementary material for: Unraveling the H₂/BMo Interface: Orientation-Driven Adsorption Landscapes for Hydrogen Storage Design
Source: Royal Society of Chemistry journal article supplement (doi:10.1039/d5cp04390e), 2026-01-01
Supplement: d5cp04390e1.xlsx [file d5cp04390e1.xlsx]

## Sheet: The H2-BMo Adsorption-Data
Phase	x (A)	y (A)	z (A)	Angle (Degree)	Tilts (Degree)	Tilt Azimuths (Degree)	E_slab+ads (eV)	E_slab (eV)	E_adsorbate (gas-phase) (eV)	E_ads = E_slab+ads - E_slab - E_adsorbate (gas-phase) (eV)
frame_1366_x0.77_y0.77_z1.5_angle60.0_tilt60.0_tazi90.0	0.77	0.77	1.5	60	60	90	-8134.16	-8102.28	-31.6312	-0.251414
frame_0526_x0.23_y0.77_z1.5_angle180.0_tilt60.0_tazi90.0	0.23	0.77	1.5	180	60	90	-8134.16	-8102.28	-31.6312	-0.251414
frame_1354_x0.77_y0.77_z1.5_angle0.0_tilt60.0_tazi90.0	0.77	0.77	1.5	0	60	90	-8134.16	-8102.28	-31.6312	-0.251413
frame_0502_x0.23_y0.77_z1.5_angle60.0_tilt60.0_tazi90.0	0.23	0.77	1.5	60	60	90	-8134.16	-8102.28	-31.6312	-0.251412
frame_0490_x0.23_y0.77_z1.5_angle0.0_tilt60.0_tazi90.0	0.23	0.77	1.5	0	60	90	-8134.16	-8102.28	-31.6312	-0.251412
frame_0514_x0.23_y0.77_z1.5_angle120.0_tilt60.0_tazi90.0	0.23	0.77	1.5	120	60	90	-8134.16	-8102.28	-31.6312	-0.251412
frame_1378_x0.77_y0.77_z1.5_angle120.0_tilt60.0_tazi90.0	0.77	0.77	1.5	120	60	90	-8134.16	-8102.28	-31.6312	-0.251412
frame_1390_x0.77_y0.77_z1.5_angle180.0_tilt60.0_tazi90.0	0.77	0.77	1.5	180	60	90	-8134.16	-8102.28	-31.6312	-0.251412
frame_0503_x0.23_y0.77_z1.5_angle60.0_tilt60.0_tazi180.0	0.23	0.77	1.5	60	60	180	-8134.15	-8102.28	-31.6312	-0.244864
frame_1365_x0.77_y0.77_z1.5_angle60.0_tilt60.0_tazi0.0	0.77	0.77	1.5	60	60	0	-8134.15	-8102.28	-31.6312	-0.244863
frame_1389_x0.77_y0.77_z1.5_angle180.0_tilt60.0_tazi0.0	0.77	0.77	1.5	180	60	0	-8134.15	-8102.28	-31.6312	-0.244863
frame_0527_x0.23_y0.77_z1.5_angle180.0_tilt60.0_tazi180.0	0.23	0.77	1.5	180	60	180	-8134.15	-8102.28	-31.6312	-0.244862
frame_0515_x0.23_y0.77_z1.5_angle120.0_tilt60.0_tazi180.0	0.23	0.77	1.5	120	60	180	-8134.15	-8102.28	-31.6312	-0.244862
frame_1353_x0.77_y0.77_z1.5_angle0.0_tilt60.0_tazi0.0	0.77	0.77	1.5	0	60	0	-8134.15	-8102.28	-31.6312	-0.244861
frame_1377_x0.77_y0.77_z1.5_angle120.0_tilt60.0_tazi0.0	0.77	0.77	1.5	120	60	0	-8134.15	-8102.28	-31.6312	-0.244861
frame_0491_x0.23_y0.77_z1.5_angle0.0_tilt60.0_tazi180.0	0.23	0.77	1.5	0	60	180	-8134.15	-8102.28	-31.6312	-0.24486
frame_0658_x0.41_y0.23_z1.5_angle120.0_tilt60.0_tazi90.0	0.41	0.23	1.5	120	60	90	-8134.1	-8102.28	-31.6312	-0.185629
frame_0634_x0.41_y0.23_z1.5_angle0.0_tilt60.0_tazi90.0	0.41	0.23	1.5	0	60	90	-8134.1	-8102.28	-31.6312	-0.185628
frame_0670_x0.41_y0.23_z1.5_angle180.0_tilt60.0_tazi90.0	0.41	0.23	1.5	180	60	90	-8134.1	-8102.28	-31.6312	-0.185628
frame_0958_x0.59_y0.23_z1.5_angle180.0_tilt60.0_tazi90.0	0.59	0.23	1.5	180	60	90	-8134.1	-8102.28	-31.6312	-0.185628
frame_0646_x0.41_y0.23_z1.5_angle60.0_tilt60.0_tazi90.0	0.41	0.23	1.5	60	60	90	-8134.1	-8102.28	-31.6312	-0.185628
frame_0946_x0.59_y0.23_z1.5_angle120.0_tilt60.0_tazi90.0	0.59	0.23	1.5	120	60	90	-8134.1	-8102.28	-31.6312	-0.185627
frame_0922_x0.59_y0.23_z1.5_angle0.0_tilt60.0_tazi90.0	0.59	0.23	1.5	0	60	90	-8134.1	-8102.28	-31.6312	-0.185627
frame_0934_x0.59_y0.23_z1.5_angle60.0_tilt60.0_tazi90.0	0.59	0.23	1.5	60	60	90	-8134.1	-8102.28	-31.6312	-0.185627
frame_1654_x0.95_y0.77_z1.5_angle60.0_tilt60.0_tazi90.0	0.95	0.77	1.5	60	60	90	-8134.06	-8102.28	-31.6312	-0.151205
frame_1678_x0.95_y0.77_z1.5_angle180.0_tilt60.0_tazi90.0	0.95	0.77	1.5	180	60	90	-8134.06	-8102.28	-31.6312	-0.151204
frame_0238_x0.05_y0.77_z1.5_angle180.0_tilt60.0_tazi90.0	0.05	0.77	1.5	180	60	90	-8134.06	-8102.28	-31.6312	-0.151204
frame_1666_x0.95_y0.77_z1.5_angle120.0_tilt60.0_tazi90.0	0.95	0.77	1.5	120	60	90	-8134.06	-8102.28	-31.6312	-0.151203
frame_0226_x0.05_y0.77_z1.5_angle120.0_tilt60.0_tazi90.0	0.05	0.77	1.5	120	60	90	-8134.06	-8102.28	-31.6312	-0.151203
frame_0202_x0.05_y0.77_z1.5_angle0.0_tilt60.0_tazi90.0	0.05	0.77	1.5	0	60	90	-8134.06	-8102.28	-31.6312	-0.151202
frame_0214_x0.05_y0.77_z1.5_angle60.0_tilt60.0_tazi90.0	0.05	0.77	1.5	60	60	90	-8134.06	-8102.28	-31.6312	-0.151202
frame_1642_x0.95_y0.77_z1.5_angle0.0_tilt60.0_tazi90.0	0.95	0.77	1.5	0	60	90	-8134.06	-8102.28	-31.6312	-0.151202
frame_0382_x0.23_y0.23_z1.5_angle180.0_tilt60.0_tazi90.0	0.23	0.23	1.5	180	60	90	-8134.02	-8102.28	-31.6312	-0.110963
frame_1210_x0.77_y0.23_z1.5_angle0.0_tilt60.0_tazi90.0	0.77	0.23	1.5	0	60	90	-8134.02	-8102.28	-31.6312	-0.110962
frame_1222_x0.77_y0.23_z1.5_angle60.0_tilt60.0_tazi90.0	0.77	0.23	1.5	60	60	90	-8134.02	-8102.28	-31.6312	-0.110961
frame_0358_x0.23_y0.23_z1.5_angle60.0_tilt60.0_tazi90.0	0.23	0.23	1.5	60	60	90	-8134.02	-8102.28	-31.6312	-0.11096
frame_1246_x0.77_y0.23_z1.5_angle180.0_tilt60.0_tazi90.0	0.77	0.23	1.5	180	60	90	-8134.02	-8102.28	-31.6312	-0.11096
frame_0370_x0.23_y0.23_z1.5_angle120.0_tilt60.0_tazi90.0	0.23	0.23	1.5	120	60	90	-8134.02	-8102.28	-31.6312	-0.110959
frame_1234_x0.77_y0.23_z1.5_angle120.0_tilt60.0_tazi90.0	0.77	0.23	1.5	120	60	90	-8134.02	-8102.28	-31.6312	-0.110959
frame_0346_x0.23_y0.23_z1.5_angle0.0_tilt60.0_tazi90.0	0.23	0.23	1.5	0	60	90	-8134.02	-8102.28	-31.6312	-0.110957
frame_0369_x0.23_y0.23_z1.5_angle120.0_tilt60.0_tazi0.0	0.23	0.23	1.5	120	60	0	-8133.98	-8102.28	-31.6312	-0.0736017
frame_0357_x0.23_y0.23_z1.5_angle60.0_tilt60.0_tazi0.0	0.23	0.23	1.5	60	60	0	-8133.98	-8102.28	-31.6312	-0.0736
frame_1211_x0.77_y0.23_z1.5_angle0.0_tilt60.0_tazi180.0	0.77	0.23	1.5	0	60	180	-8133.98	-8102.28	-31.6312	-0.0735987
frame_1235_x0.77_y0.23_z1.5_angle120.0_tilt60.0_tazi180.0	0.77	0.23	1.5	120	60	180	-8133.98	-8102.28	-31.6312	-0.0735986
frame_1223_x0.77_y0.23_z1.5_angle60.0_tilt60.0_tazi180.0	0.77	0.23	1.5	60	60	180	-8133.98	-8102.28	-31.6312	-0.0735982
frame_0381_x0.23_y0.23_z1.5_angle180.0_tilt60.0_tazi0.0	0.23	0.23	1.5	180	60	0	-8133.98	-8102.28	-31.6312	-0.0735978
frame_0345_x0.23_y0.23_z1.5_angle0.0_tilt60.0_tazi0.0	0.23	0.23	1.5	0	60	0	-8133.98	-8102.28	-31.6312	-0.0735965
frame_1247_x0.77_y0.23_z1.5_angle180.0_tilt60.0_tazi180.0	0.77	0.23	1.5	180	60	180	-8133.98	-8102.28	-31.6312	-0.0735957
frame_1066_x0.59_y0.77_z1.5_angle0.0_tilt60.0_tazi90.0	0.59	0.77	1.5	0	60	90	-8133.96	-8102.28	-31.6312	-0.0498886
frame_0790_x0.41_y0.77_z1.5_angle60.0_tilt60.0_tazi90.0	0.41	0.77	1.5	60	60	90	-8133.96	-8102.28	-31.6312	-0.0498817
frame_0802_x0.41_y0.77_z1.5_angle120.0_tilt60.0_tazi90.0	0.41	0.77	1.5	120	60	90	-8133.96	-8102.28	-31.6312	-0.049879
frame_1078_x0.59_y0.77_z1.5_angle60.0_tilt60.0_tazi90.0	0.59	0.77	1.5	60	60	90	-8133.96	-8102.28	-31.6312	-0.0498787
frame_0778_x0.41_y0.77_z1.5_angle0.0_tilt60.0_tazi90.0	0.41	0.77	1.5	0	60	90	-8133.96	-8102.28	-31.6312	-0.0498785
frame_1090_x0.59_y0.77_z1.5_angle120.0_tilt60.0_tazi90.0	0.59	0.77	1.5	120	60	90	-8133.96	-8102.28	-31.6312	-0.0498777
frame_1102_x0.59_y0.77_z1.5_angle180.0_tilt60.0_tazi90.0	0.59	0.77	1.5	180	60	90	-8133.96	-8102.28	-31.6312	-0.0498772
frame_0814_x0.41_y0.77_z1.5_angle180.0_tilt60.0_tazi90.0	0.41	0.77	1.5	180	60	90	-8133.96	-8102.28	-31.6312	-0.0498745
frame_1218_x0.77_y0.23_z1.5_angle60.0_tilt30.0_tazi90.0	0.77	0.23	1.5	60	30	90	-8133.94	-8102.28	-31.6312	-0.0337908
frame_0354_x0.23_y0.23_z1.5_angle60.0_tilt30.0_tazi90.0	0.23	0.23	1.5	60	30	90	-8133.94	-8102.28	-31.6312	-0.0337907
frame_1242_x0.77_y0.23_z1.5_angle180.0_tilt30.0_tazi90.0	0.77	0.23	1.5	180	30	90	-8133.94	-8102.28	-31.6312	-0.0337898
frame_0342_x0.23_y0.23_z1.5_angle0.0_tilt30.0_tazi90.0	0.23	0.23	1.5	0	30	90	-8133.94	-8102.28	-31.6312	-0.0337892
frame_0378_x0.23_y0.23_z1.5_angle180.0_tilt30.0_tazi90.0	0.23	0.23	1.5	180	30	90	-8133.94	-8102.28	-31.6312	-0.0337891
frame_1230_x0.77_y0.23_z1.5_angle120.0_tilt30.0_tazi90.0	0.77	0.23	1.5	120	30	90	-8133.94	-8102.28	-31.6312	-0.0337889
frame_0366_x0.23_y0.23_z1.5_angle120.0_tilt30.0_tazi90.0	0.23	0.23	1.5	120	30	90	-8133.94	-8102.28	-31.6312	-0.0337869
frame_1206_x0.77_y0.23_z1.5_angle0.0_tilt30.0_tazi90.0	0.77	0.23	1.5	0	30	90	-8133.94	-8102.28	-31.6312	-0.0337843
frame_0959_x0.59_y0.23_z1.5_angle180.0_tilt60.0_tazi180.0	0.59	0.23	1.5	180	60	180	-8133.91	-8102.28	-31.6312	0.00331973
frame_0935_x0.59_y0.23_z1.5_angle60.0_tilt60.0_tazi180.0	0.59	0.23	1.5	60	60	180	-8133.91	-8102.28	-31.6312	0.00331984
frame_0645_x0.41_y0.23_z1.5_angle60.0_tilt60.0_tazi0.0	0.41	0.23	1.5	60	60	0	-8133.91	-8102.28	-31.6312	0.00332114
frame_0947_x0.59_y0.23_z1.5_angle120.0_tilt60.0_tazi180.0	0.59	0.23	1.5	120	60	180	-8133.91	-8102.28	-31.6312	0.00332156
frame_0633_x0.41_y0.23_z1.5_angle0.0_tilt60.0_tazi0.0	0.41	0.23	1.5	0	60	0	-8133.91	-8102.28	-31.6312	0.00332249
frame_0669_x0.41_y0.23_z1.5_angle180.0_tilt60.0_tazi0.0	0.41	0.23	1.5	180	60	0	-8133.91	-8102.28	-31.6312	0.00332289
frame_0923_x0.59_y0.23_z1.5_angle0.0_tilt60.0_tazi180.0	0.59	0.23	1.5	0	60	180	-8133.91	-8102.28	-31.6312	0.0033238
frame_0657_x0.41_y0.23_z1.5_angle120.0_tilt60.0_tazi0.0	0.41	0.23	1.5	120	60	0	-8133.91	-8102.28	-31.6312	0.00332525
frame_0791_x0.41_y0.77_z1.5_angle60.0_tilt60.0_tazi180.0	0.41	0.77	1.5	60	60	180	-8133.89	-8102.28	-31.6312	0.0176042
frame_1065_x0.59_y0.77_z1.5_angle0.0_tilt60.0_tazi0.0	0.59	0.77	1.5	0	60	0	-8133.89	-8102.28	-31.6312	0.0176046
frame_1101_x0.59_y0.77_z1.5_angle180.0_tilt60.0_tazi0.0	0.59	0.77	1.5	180	60	0	-8133.89	-8102.28	-31.6312	0.017605
frame_0815_x0.41_y0.77_z1.5_angle180.0_tilt60.0_tazi180.0	0.41	0.77	1.5	180	60	180	-8133.89	-8102.28	-31.6312	0.0176053
frame_1089_x0.59_y0.77_z1.5_angle120.0_tilt60.0_tazi0.0	0.59	0.77	1.5	120	60	0	-8133.89	-8102.28	-31.6312	0.0176058
frame_0803_x0.41_y0.77_z1.5_angle120.0_tilt60.0_tazi180.0	0.41	0.77	1.5	120	60	180	-8133.89	-8102.28	-31.6312	0.0176065
frame_0779_x0.41_y0.77_z1.5_angle0.0_tilt60.0_tazi180.0	0.41	0.77	1.5	0	60	180	-8133.89	-8102.28	-31.6312	0.017607
frame_1077_x0.59_y0.77_z1.5_angle60.0_tilt60.0_tazi0.0	0.59	0.77	1.5	60	60	0	-8133.89	-8102.28	-31.6312	0.0176074
frame_0918_x0.59_y0.23_z1.5_angle0.0_tilt30.0_tazi90.0	0.59	0.23	1.5	0	30	90	-8133.89	-8102.28	-31.6312	0.0191641
frame_0630_x0.41_y0.23_z1.5_angle0.0_tilt30.0_tazi90.0	0.41	0.23	1.5	0	30	90	-8133.89	-8102.28	-31.6312	0.0191643
frame_0666_x0.41_y0.23_z1.5_angle180.0_tilt30.0_tazi90.0	0.41	0.23	1.5	180	30	90	-8133.89	-8102.28	-31.6312	0.0191651
frame_0954_x0.59_y0.23_z1.5_angle180.0_tilt30.0_tazi90.0	0.59	0.23	1.5	180	30	90	-8133.89	-8102.28	-31.6312	0.0191652
frame_0942_x0.59_y0.23_z1.5_angle120.0_tilt30.0_tazi90.0	0.59	0.23	1.5	120	30	90	-8133.89	-8102.28	-31.6312	0.0191659
frame_0654_x0.41_y0.23_z1.5_angle120.0_tilt30.0_tazi90.0	0.41	0.23	1.5	120	30	90	-8133.89	-8102.28	-31.6312	0.0191659
frame_0930_x0.59_y0.23_z1.5_angle60.0_tilt30.0_tazi90.0	0.59	0.23	1.5	60	30	90	-8133.89	-8102.28	-31.6312	0.0191663
frame_0642_x0.41_y0.23_z1.5_angle60.0_tilt30.0_tazi90.0	0.41	0.23	1.5	60	30	90	-8133.89	-8102.28	-31.6312	0.0191668
frame_0353_x0.23_y0.23_z1.5_angle60.0_tilt30.0_tazi0.0	0.23	0.23	1.5	60	30	0	-8133.89	-8102.28	-31.6312	0.0244363
frame_1219_x0.77_y0.23_z1.5_angle60.0_tilt30.0_tazi180.0	0.77	0.23	1.5	60	30	180	-8133.89	-8102.28	-31.6312	0.024437
frame_0377_x0.23_y0.23_z1.5_angle180.0_tilt30.0_tazi0.0	0.23	0.23	1.5	180	30	0	-8133.89	-8102.28	-31.6312	0.0244371
frame_1207_x0.77_y0.23_z1.5_angle0.0_tilt30.0_tazi180.0	0.77	0.23	1.5	0	30	180	-8133.89	-8102.28	-31.6312	0.0244376
frame_1231_x0.77_y0.23_z1.5_angle120.0_tilt30.0_tazi180.0	0.77	0.23	1.5	120	30	180	-8133.89	-8102.28	-31.6312	0.0244377
frame_0365_x0.23_y0.23_z1.5_angle120.0_tilt30.0_tazi0.0	0.23	0.23	1.5	120	30	0	-8133.89	-8102.28	-31.6312	0.0244377
frame_0341_x0.23_y0.23_z1.5_angle0.0_tilt30.0_tazi0.0	0.23	0.23	1.5	0	30	0	-8133.89	-8102.28	-31.6312	0.0244409
frame_1243_x0.77_y0.23_z1.5_angle180.0_tilt30.0_tazi180.0	0.77	0.23	1.5	180	30	180	-8133.89	-8102.28	-31.6312	0.0244425
frame_1074_x0.59_y0.77_z1.5_angle60.0_tilt30.0_tazi90.0	0.59	0.77	1.5	60	30	90	-8133.89	-8102.28	-31.6312	0.0244456
frame_0810_x0.41_y0.77_z1.5_angle180.0_tilt30.0_tazi90.0	0.41	0.77	1.5	180	30	90	-8133.89	-8102.28	-31.6312	0.0244471
frame_0774_x0.41_y0.77_z1.5_angle0.0_tilt30.0_tazi90.0	0.41	0.77	1.5	0	30	90	-8133.89	-8102.28	-31.6312	0.0244475
frame_0798_x0.41_y0.77_z1.5_angle120.0_tilt30.0_tazi90.0	0.41	0.77	1.5	120	30	90	-8133.89	-8102.28	-31.6312	0.024448
frame_1086_x0.59_y0.77_z1.5_angle120.0_tilt30.0_tazi90.0	0.59	0.77	1.5	120	30	90	-8133.89	-8102.28	-31.6312	0.0244517
frame_1062_x0.59_y0.77_z1.5_angle0.0_tilt30.0_tazi90.0	0.59	0.77	1.5	0	30	90	-8133.89	-8102.28	-31.6312	0.024453
frame_1098_x0.59_y0.77_z1.5_angle180.0_tilt30.0_tazi90.0	0.59	0.77	1.5	180	30	90	-8133.89	-8102.28	-31.6312	0.0244538
frame_0786_x0.41_y0.77_z1.5_angle60.0_tilt30.0_tazi90.0	0.41	0.77	1.5	60	30	90	-8133.89	-8102.28	-31.6312	0.0244549
frame_1097_x0.59_y0.77_z1.5_angle180.0_tilt30.0_tazi0.0	0.59	0.77	1.5	180	30	0	-8133.88	-8102.28	-31.6312	0.0275892
frame_1085_x0.59_y0.77_z1.5_angle120.0_tilt30.0_tazi0.0	0.59	0.77	1.5	120	30	0	-8133.88	-8102.28	-31.6312	0.02759
frame_0787_x0.41_y0.77_z1.5_angle60.0_tilt30.0_tazi180.0	0.41	0.77	1.5	60	30	180	-8133.88	-8102.28	-31.6312	0.02759
frame_0811_x0.41_y0.77_z1.5_angle180.0_tilt30.0_tazi180.0	0.41	0.77	1.5	180	30	180	-8133.88	-8102.28	-31.6312	0.0275901
frame_1061_x0.59_y0.77_z1.5_angle0.0_tilt30.0_tazi0.0	0.59	0.77	1.5	0	30	0	-8133.88	-8102.28	-31.6312	0.0275904
frame_1073_x0.59_y0.77_z1.5_angle60.0_tilt30.0_tazi0.0	0.59	0.77	1.5	60	30	0	-8133.88	-8102.28	-31.6312	0.0275906
frame_0775_x0.41_y0.77_z1.5_angle0.0_tilt30.0_tazi180.0	0.41	0.77	1.5	0	30	180	-8133.88	-8102.28	-31.6312	0.0275906
frame_0799_x0.41_y0.77_z1.5_angle120.0_tilt30.0_tazi180.0	0.41	0.77	1.5	120	30	180	-8133.88	-8102.28	-31.6312	0.0275921
frame_1716_x0.95_y0.95_z1.5_angle120.0_tilt60.0_tazi270.0	0.95	0.95	1.5	120	60	270	-8133.83	-8102.28	-31.6312	0.0762859
frame_0276_x0.05_y0.95_z1.5_angle120.0_tilt60.0_tazi270.0	0.05	0.95	1.5	120	60	270	-8133.83	-8102.28	-31.6312	0.0762864
frame_0264_x0.05_y0.95_z1.5_angle60.0_tilt60.0_tazi270.0	0.05	0.95	1.5	60	60	270	-8133.83	-8102.28	-31.6312	0.0762872
frame_0288_x0.05_y0.95_z1.5_angle180.0_tilt60.0_tazi270.0	0.05	0.95	1.5	180	60	270	-8133.83	-8102.28	-31.6312	0.0762872
frame_1692_x0.95_y0.95_z1.5_angle0.0_tilt60.0_tazi270.0	0.95	0.95	1.5	0	60	270	-8133.83	-8102.28	-31.6312	0.0762875
frame_1728_x0.95_y0.95_z1.5_angle180.0_tilt60.0_tazi270.0	0.95	0.95	1.5	180	60	270	-8133.83	-8102.28	-31.6312	0.0762889
frame_0252_x0.05_y0.95_z1.5_angle0.0_tilt60.0_tazi270.0	0.05	0.95	1.5	0	60	270	-8133.83	-8102.28	-31.6312	0.0762909
frame_1704_x0.95_y0.95_z1.5_angle60.0_tilt60.0_tazi270.0	0.95	0.95	1.5	60	60	270	-8133.83	-8102.28	-31.6312	0.0762935
frame_0054_x0.05_y0.23_z1.5_angle0.0_tilt30.0_tazi90.0	0.05	0.23	1.5	0	30	90	-8133.83	-8102.28	-31.6312	0.0841694
frame_1506_x0.95_y0.23_z1.5_angle60.0_tilt30.0_tazi90.0	0.95	0.23	1.5	60	30	90	-8133.83	-8102.28	-31.6312	0.0841696
frame_0090_x0.05_y0.23_z1.5_angle180.0_tilt30.0_tazi90.0	0.05	0.23	1.5	180	30	90	-8133.83	-8102.28	-31.6312	0.0841706
frame_0066_x0.05_y0.23_z1.5_angle60.0_tilt30.0_tazi90.0	0.05	0.23	1.5	60	30	90	-8133.83	-8102.28	-31.6312	0.0841709
frame_0078_x0.05_y0.23_z1.5_angle120.0_tilt30.0_tazi90.0	0.05	0.23	1.5	120	30	90	-8133.83	-8102.28	-31.6312	0.0841715
frame_1494_x0.95_y0.23_z1.5_angle0.0_tilt30.0_tazi90.0	0.95	0.23	1.5	0	30	90	-8133.83	-8102.28	-31.6312	0.0841732
frame_1518_x0.95_y0.23_z1.5_angle120.0_tilt30.0_tazi90.0	0.95	0.23	1.5	120	30	90	-8133.83	-8102.28	-31.6312	0.0841743
frame_1530_x0.95_y0.23_z1.5_angle180.0_tilt30.0_tazi90.0	0.95	0.23	1.5	180	30	90	-8133.83	-8102.28	-31.6312	0.0841755
frame_1510_x0.95_y0.23_z1.5_angle60.0_tilt60.0_tazi90.0	0.95	0.23	1.5	60	60	90	-8133.82	-8102.28	-31.6312	0.0860954
frame_0082_x0.05_y0.23_z1.5_angle120.0_tilt60.0_tazi90.0	0.05	0.23	1.5	120	60	90	-8133.82	-8102.28	-31.6312	0.0860955
frame_0094_x0.05_y0.23_z1.5_angle180.0_tilt60.0_tazi90.0	0.05	0.23	1.5	180	60	90	-8133.82	-8102.28	-31.6312	0.086096
frame_1522_x0.95_y0.23_z1.5_angle120.0_tilt60.0_tazi90.0	0.95	0.23	1.5	120	60	90	-8133.82	-8102.28	-31.6312	0.0860962
frame_0522_x0.23_y0.77_z1.5_angle180.0_tilt30.0_tazi90.0	0.23	0.77	1.5	180	30	90	-8133.82	-8102.28	-31.6312	0.0860964
frame_1374_x0.77_y0.77_z1.5_angle120.0_tilt30.0_tazi90.0	0.77	0.77	1.5	120	30	90	-8133.82	-8102.28	-31.6312	0.0860965
frame_1498_x0.95_y0.23_z1.5_angle0.0_tilt60.0_tazi90.0	0.95	0.23	1.5	0	60	90	-8133.82	-8102.28	-31.6312	0.0860967
frame_0070_x0.05_y0.23_z1.5_angle60.0_tilt60.0_tazi90.0	0.05	0.23	1.5	60	60	90	-8133.82	-8102.28	-31.6312	0.0860969
frame_1534_x0.95_y0.23_z1.5_angle180.0_tilt60.0_tazi90.0	0.95	0.23	1.5	180	60	90	-8133.82	-8102.28	-31.6312	0.0860969
frame_0058_x0.05_y0.23_z1.5_angle0.0_tilt60.0_tazi90.0	0.05	0.23	1.5	0	60	90	-8133.82	-8102.28	-31.6312	0.086098
frame_1362_x0.77_y0.77_z1.5_angle60.0_tilt30.0_tazi90.0	0.77	0.77	1.5	60	30	90	-8133.82	-8102.28	-31.6312	0.0860984
frame_0486_x0.23_y0.77_z1.5_angle0.0_tilt30.0_tazi90.0	0.23	0.77	1.5	0	30	90	-8133.82	-8102.28	-31.6312	0.0860995
frame_0510_x0.23_y0.77_z1.5_angle120.0_tilt30.0_tazi90.0	0.23	0.77	1.5	120	30	90	-8133.82	-8102.28	-31.6312	0.0860999
frame_1386_x0.77_y0.77_z1.5_angle180.0_tilt30.0_tazi90.0	0.77	0.77	1.5	180	30	90	-8133.82	-8102.28	-31.6312	0.0861007
frame_1350_x0.77_y0.77_z1.5_angle0.0_tilt30.0_tazi90.0	0.77	0.77	1.5	0	30	90	-8133.82	-8102.28	-31.6312	0.086101
frame_0498_x0.23_y0.77_z1.5_angle60.0_tilt30.0_tazi90.0	0.23	0.77	1.5	60	30	90	-8133.82	-8102.28	-31.6312	0.0861013
frame_1349_x0.77_y0.77_z1.5_angle0.0_tilt30.0_tazi0.0	0.77	0.77	1.5	0	30	0	-8133.81	-8102.28	-31.6312	0.0975349
frame_0499_x0.23_y0.77_z1.5_angle60.0_tilt30.0_tazi180.0	0.23	0.77	1.5	60	30	180	-8133.81	-8102.28	-31.6312	0.0975358
frame_1373_x0.77_y0.77_z1.5_angle120.0_tilt30.0_tazi0.0	0.77	0.77	1.5	120	30	0	-8133.81	-8102.28	-31.6312	0.097536
frame_0523_x0.23_y0.77_z1.5_angle180.0_tilt30.0_tazi180.0	0.23	0.77	1.5	180	30	180	-8133.81	-8102.28	-31.6312	0.0975367
frame_1361_x0.77_y0.77_z1.5_angle60.0_tilt30.0_tazi0.0	0.77	0.77	1.5	60	30	0	-8133.81	-8102.28	-31.6312	0.0975368
frame_0511_x0.23_y0.77_z1.5_angle120.0_tilt30.0_tazi180.0	0.23	0.77	1.5	120	30	180	-8133.81	-8102.28	-31.6312	0.0975394
frame_0487_x0.23_y0.77_z1.5_angle0.0_tilt30.0_tazi180.0	0.23	0.77	1.5	0	30	180	-8133.81	-8102.28	-31.6312	0.0975395
frame_1385_x0.77_y0.77_z1.5_angle180.0_tilt30.0_tazi0.0	0.77	0.77	1.5	180	30	0	-8133.81	-8102.28	-31.6312	0.097541
frame_0417_x0.23_y0.41_z1.5_angle120.0_tilt60.0_tazi0.0	0.23	0.41	1.5	120	60	0	-8133.8	-8102.28	-31.6312	0.107477
frame_1283_x0.77_y0.41_z1.5_angle120.0_tilt60.0_tazi180.0	0.77	0.41	1.5	120	60	180	-8133.8	-8102.28	-31.6312	0.107479
frame_0393_x0.23_y0.41_z1.5_angle0.0_tilt60.0_tazi0.0	0.23	0.41	1.5	0	60	0	-8133.8	-8102.28	-31.6312	0.10748
frame_1271_x0.77_y0.41_z1.5_angle60.0_tilt60.0_tazi180.0	0.77	0.41	1.5	60	60	180	-8133.8	-8102.28	-31.6312	0.10748
frame_1295_x0.77_y0.41_z1.5_angle180.0_tilt60.0_tazi180.0	0.77	0.41	1.5	180	60	180	-8133.8	-8102.28	-31.6312	0.10748
frame_0405_x0.23_y0.41_z1.5_angle60.0_tilt60.0_tazi0.0	0.23	0.41	1.5	60	60	0	-8133.8	-8102.28	-31.6312	0.10748
frame_0429_x0.23_y0.41_z1.5_angle180.0_tilt60.0_tazi0.0	0.23	0.41	1.5	180	60	0	-8133.8	-8102.28	-31.6312	0.107482
frame_1259_x0.77_y0.41_z1.5_angle0.0_tilt60.0_tazi180.0	0.77	0.41	1.5	0	60	180	-8133.8	-8102.28	-31.6312	0.107483
frame_0053_x0.05_y0.23_z1.5_angle0.0_tilt30.0_tazi0.0	0.05	0.23	1.5	0	30	0	-8133.78	-8102.28	-31.6312	0.132511
frame_1507_x0.95_y0.23_z1.5_angle60.0_tilt30.0_tazi180.0	0.95	0.23	1.5	60	30	180	-8133.78	-8102.28	-31.6312	0.132511
frame_1495_x0.95_y0.23_z1.5_angle0.0_tilt30.0_tazi180.0	0.95	0.23	1.5	0	30	180	-8133.78	-8102.28	-31.6312	0.132512
frame_1531_x0.95_y0.23_z1.5_angle180.0_tilt30.0_tazi180.0	0.95	0.23	1.5	180	30	180	-8133.78	-8102.28	-31.6312	0.132512
frame_0089_x0.05_y0.23_z1.5_angle180.0_tilt30.0_tazi0.0	0.05	0.23	1.5	180	30	0	-8133.78	-8102.28	-31.6312	0.132513
frame_0065_x0.05_y0.23_z1.5_angle60.0_tilt30.0_tazi0.0	0.05	0.23	1.5	60	30	0	-8133.78	-8102.28	-31.6312	0.132514
frame_0077_x0.05_y0.23_z1.5_angle120.0_tilt30.0_tazi0.0	0.05	0.23	1.5	120	30	0	-8133.78	-8102.28	-31.6312	0.132516
frame_1519_x0.95_y0.23_z1.5_angle120.0_tilt30.0_tazi180.0	0.95	0.23	1.5	120	30	180	-8133.78	-8102.28	-31.6312	0.132516
frame_0069_x0.05_y0.23_z1.5_angle60.0_tilt60.0_tazi0.0	0.05	0.23	1.5	60	60	0	-8133.77	-8102.28	-31.6312	0.143146
frame_1499_x0.95_y0.23_z1.5_angle0.0_tilt60.0_tazi180.0	0.95	0.23	1.5	0	60	180	-8133.77	-8102.28	-31.6312	0.143146
frame_1523_x0.95_y0.23_z1.5_angle120.0_tilt60.0_tazi180.0	0.95	0.23	1.5	120	60	180	-8133.77	-8102.28	-31.6312	0.143147
frame_1535_x0.95_y0.23_z1.5_angle180.0_tilt60.0_tazi180.0	0.95	0.23	1.5	180	60	180	-8133.77	-8102.28	-31.6312	0.143147
frame_0081_x0.05_y0.23_z1.5_angle120.0_tilt60.0_tazi0.0	0.05	0.23	1.5	120	60	0	-8133.77	-8102.28	-31.6312	0.143148
frame_0057_x0.05_y0.23_z1.5_angle0.0_tilt60.0_tazi0.0	0.05	0.23	1.5	0	60	0	-8133.77	-8102.28	-31.6312	0.143148
frame_0093_x0.05_y0.23_z1.5_angle180.0_tilt60.0_tazi0.0	0.05	0.23	1.5	180	60	0	-8133.77	-8102.28	-31.6312	0.143148
frame_1511_x0.95_y0.23_z1.5_angle60.0_tilt60.0_tazi180.0	0.95	0.23	1.5	60	60	180	-8133.77	-8102.28	-31.6312	0.143148
frame_0551_x0.23_y0.95_z1.5_angle60.0_tilt60.0_tazi180.0	0.23	0.95	1.5	60	60	180	-8133.76	-8102.28	-31.6312	0.151629
frame_0539_x0.23_y0.95_z1.5_angle0.0_tilt60.0_tazi180.0	0.23	0.95	1.5	0	60	180	-8133.76	-8102.28	-31.6312	0.15163
frame_1437_x0.77_y0.95_z1.5_angle180.0_tilt60.0_tazi0.0	0.77	0.95	1.5	180	60	0	-8133.76	-8102.28	-31.6312	0.151634
frame_1413_x0.77_y0.95_z1.5_angle60.0_tilt60.0_tazi0.0	0.77	0.95	1.5	60	60	0	-8133.76	-8102.28	-31.6312	0.151635
frame_1401_x0.77_y0.95_z1.5_angle0.0_tilt60.0_tazi0.0	0.77	0.95	1.5	0	60	0	-8133.76	-8102.28	-31.6312	0.151635
frame_0563_x0.23_y0.95_z1.5_angle120.0_tilt60.0_tazi180.0	0.23	0.95	1.5	120	60	180	-8133.76	-8102.28	-31.6312	0.151636
frame_0575_x0.23_y0.95_z1.5_angle180.0_tilt60.0_tazi180.0	0.23	0.95	1.5	180	60	180	-8133.76	-8102.28	-31.6312	0.151636
frame_1425_x0.77_y0.95_z1.5_angle120.0_tilt60.0_tazi0.0	0.77	0.95	1.5	120	60	0	-8133.76	-8102.28	-31.6312	0.151636
frame_0063_x0.05_y0.23_z1.5_angle60.0_tilt0.0_tazi180.0	0.05	0.23	1.5	60	0	180	-8133.75	-8102.28	-31.6312	0.160868
frame_1490_x0.95_y0.23_z1.5_angle0.0_tilt0.0_tazi90.0	0.95	0.23	1.5	0	0	90	-8133.75	-8102.28	-31.6312	0.160868
frame_1501_x0.95_y0.23_z1.5_angle60.0_tilt0.0_tazi0.0	0.95	0.23	1.5	60	0	0	-8133.75	-8102.28	-31.6312	0.160868
frame_0085_x0.05_y0.23_z1.5_angle180.0_tilt0.0_tazi0.0	0.05	0.23	1.5	180	0	0	-8133.75	-8102.28	-31.6312	0.160868
frame_0086_x0.05_y0.23_z1.5_angle180.0_tilt0.0_tazi90.0	0.05	0.23	1.5	180	0	90	-8133.75	-8102.28	-31.6312	0.160868
frame_0050_x0.05_y0.23_z1.5_angle0.0_tilt0.0_tazi90.0	0.05	0.23	1.5	0	0	90	-8133.75	-8102.28	-31.6312	0.160869
frame_0087_x0.05_y0.23_z1.5_angle180.0_tilt0.0_tazi180.0	0.05	0.23	1.5	180	0	180	-8133.75	-8102.28	-31.6312	0.160869
frame_0088_x0.05_y0.23_z1.5_angle180.0_tilt0.0_tazi270.0	0.05	0.23	1.5	180	0	270	-8133.75	-8102.28	-31.6312	0.160869
frame_1492_x0.95_y0.23_z1.5_angle0.0_tilt0.0_tazi270.0	0.95	0.23	1.5	0	0	270	-8133.75	-8102.28	-31.6312	0.160869
frame_1515_x0.95_y0.23_z1.5_angle120.0_tilt0.0_tazi180.0	0.95	0.23	1.5	120	0	180	-8133.75	-8102.28	-31.6312	0.160869
frame_0049_x0.05_y0.23_z1.5_angle0.0_tilt0.0_tazi0.0	0.05	0.23	1.5	0	0	0	-8133.75	-8102.28	-31.6312	0.160869
frame_1513_x0.95_y0.23_z1.5_angle120.0_tilt0.0_tazi0.0	0.95	0.23	1.5	120	0	0	-8133.75	-8102.28	-31.6312	0.160869
frame_1491_x0.95_y0.23_z1.5_angle0.0_tilt0.0_tazi180.0	0.95	0.23	1.5	0	0	180	-8133.75	-8102.28	-31.6312	0.160869
frame_0061_x0.05_y0.23_z1.5_angle60.0_tilt0.0_tazi0.0	0.05	0.23	1.5	60	0	0	-8133.75	-8102.28	-31.6312	0.160869
frame_1489_x0.95_y0.23_z1.5_angle0.0_tilt0.0_tazi0.0	0.95	0.23	1.5	0	0	0	-8133.75	-8102.28	-31.6312	0.16087
frame_0073_x0.05_y0.23_z1.5_angle120.0_tilt0.0_tazi0.0	0.05	0.23	1.5	120	0	0	-8133.75	-8102.28	-31.6312	0.16087
frame_1514_x0.95_y0.23_z1.5_angle120.0_tilt0.0_tazi90.0	0.95	0.23	1.5	120	0	90	-8133.75	-8102.28	-31.6312	0.16087
frame_0075_x0.05_y0.23_z1.5_angle120.0_tilt0.0_tazi180.0	0.05	0.23	1.5	120	0	180	-8133.75	-8102.28	-31.6312	0.16087
frame_0074_x0.05_y0.23_z1.5_angle120.0_tilt0.0_tazi90.0	0.05	0.23	1.5	120	0	90	-8133.75	-8102.28	-31.6312	0.16087
frame_1528_x0.95_y0.23_z1.5_angle180.0_tilt0.0_tazi270.0	0.95	0.23	1.5	180	0	270	-8133.75	-8102.28	-31.6312	0.16087
frame_1503_x0.95_y0.23_z1.5_angle60.0_tilt0.0_tazi180.0	0.95	0.23	1.5	60	0	180	-8133.75	-8102.28	-31.6312	0.16087
frame_1504_x0.95_y0.23_z1.5_angle60.0_tilt0.0_tazi270.0	0.95	0.23	1.5	60	0	270	-8133.75	-8102.28	-31.6312	0.16087
frame_1516_x0.95_y0.23_z1.5_angle120.0_tilt0.0_tazi270.0	0.95	0.23	1.5	120	0	270	-8133.75	-8102.28	-31.6312	0.160871
frame_0064_x0.05_y0.23_z1.5_angle60.0_tilt0.0_tazi270.0	0.05	0.23	1.5	60	0	270	-8133.75	-8102.28	-31.6312	0.160871
frame_1502_x0.95_y0.23_z1.5_angle60.0_tilt0.0_tazi90.0	0.95	0.23	1.5	60	0	90	-8133.75	-8102.28	-31.6312	0.160871
frame_0076_x0.05_y0.23_z1.5_angle120.0_tilt0.0_tazi270.0	0.05	0.23	1.5	120	0	270	-8133.75	-8102.28	-31.6312	0.160872
frame_1525_x0.95_y0.23_z1.5_angle180.0_tilt0.0_tazi0.0	0.95	0.23	1.5	180	0	0	-8133.75	-8102.28	-31.6312	0.160873
frame_1526_x0.95_y0.23_z1.5_angle180.0_tilt0.0_tazi90.0	0.95	0.23	1.5	180	0	90	-8133.75	-8102.28	-31.6312	0.160873
frame_0052_x0.05_y0.23_z1.5_angle0.0_tilt0.0_tazi270.0	0.05	0.23	1.5	0	0	270	-8133.75	-8102.28	-31.6312	0.160874
frame_1527_x0.95_y0.23_z1.5_angle180.0_tilt0.0_tazi180.0	0.95	0.23	1.5	180	0	180	-8133.75	-8102.28	-31.6312	0.160874
frame_0051_x0.05_y0.23_z1.5_angle0.0_tilt0.0_tazi180.0	0.05	0.23	1.5	0	0	180	-8133.75	-8102.28	-31.6312	0.160874
frame_0062_x0.05_y0.23_z1.5_angle60.0_tilt0.0_tazi90.0	0.05	0.23	1.5	60	0	90	-8133.75	-8102.28	-31.6312	0.160875
frame_0780_x0.41_y0.77_z1.5_angle0.0_tilt60.0_tazi270.0	0.41	0.77	1.5	0	60	270	-8133.73	-8102.28	-31.6312	0.183921
frame_0792_x0.41_y0.77_z1.5_angle60.0_tilt60.0_tazi270.0	0.41	0.77	1.5	60	60	270	-8133.73	-8102.28	-31.6312	0.183922
frame_0804_x0.41_y0.77_z1.5_angle120.0_tilt60.0_tazi270.0	0.41	0.77	1.5	120	60	270	-8133.73	-8102.28	-31.6312	0.183923
frame_1104_x0.59_y0.77_z1.5_angle180.0_tilt60.0_tazi270.0	0.59	0.77	1.5	180	60	270	-8133.73	-8102.28	-31.6312	0.183932
frame_1068_x0.59_y0.77_z1.5_angle0.0_tilt60.0_tazi270.0	0.59	0.77	1.5	0	60	270	-8133.73	-8102.28	-31.6312	0.183933
frame_1092_x0.59_y0.77_z1.5_angle120.0_tilt60.0_tazi270.0	0.59	0.77	1.5	120	60	270	-8133.73	-8102.28	-31.6312	0.183934
frame_1080_x0.59_y0.77_z1.5_angle60.0_tilt60.0_tazi270.0	0.59	0.77	1.5	60	60	270	-8133.73	-8102.28	-31.6312	0.183936
frame_0816_x0.41_y0.77_z1.5_angle180.0_tilt60.0_tazi270.0	0.41	0.77	1.5	180	60	270	-8133.73	-8102.28	-31.6312	0.183936
frame_1082_x0.59_y0.77_z1.5_angle120.0_tilt0.0_tazi90.0	0.59	0.77	1.5	120	0	90	-8133.72	-8102.28	-31.6312	0.190197
frame_0772_x0.41_y0.77_z1.5_angle0.0_tilt0.0_tazi270.0	0.41	0.77	1.5	0	0	270	-8133.72	-8102.28	-31.6312	0.190197
frame_0781_x0.41_y0.77_z1.5_angle60.0_tilt0.0_tazi0.0	0.41	0.77	1.5	60	0	0	-8133.72	-8102.28	-31.6312	0.190197
frame_1070_x0.59_y0.77_z1.5_angle60.0_tilt0.0_tazi90.0	0.59	0.77	1.5	60	0	90	-8133.72	-8102.28	-31.6312	0.190197
frame_1059_x0.59_y0.77_z1.5_angle0.0_tilt0.0_tazi180.0	0.59	0.77	1.5	0	0	180	-8133.72	-8102.28	-31.6312	0.190197
frame_0782_x0.41_y0.77_z1.5_angle60.0_tilt0.0_tazi90.0	0.41	0.77	1.5	60	0	90	-8133.72	-8102.28	-31.6312	0.190198
frame_1096_x0.59_y0.77_z1.5_angle180.0_tilt0.0_tazi270.0	0.59	0.77	1.5	180	0	270	-8133.72	-8102.28	-31.6312	0.190198
frame_0806_x0.41_y0.77_z1.5_angle180.0_tilt0.0_tazi90.0	0.41	0.77	1.5	180	0	90	-8133.72	-8102.28	-31.6312	0.190198
frame_1081_x0.59_y0.77_z1.5_angle120.0_tilt0.0_tazi0.0	0.59	0.77	1.5	120	0	0	-8133.72	-8102.28	-31.6312	0.190198
frame_1084_x0.59_y0.77_z1.5_angle120.0_tilt0.0_tazi270.0	0.59	0.77	1.5	120	0	270	-8133.72	-8102.28	-31.6312	0.190198
frame_0771_x0.41_y0.77_z1.5_angle0.0_tilt0.0_tazi180.0	0.41	0.77	1.5	0	0	180	-8133.72	-8102.28	-31.6312	0.190198
frame_1071_x0.59_y0.77_z1.5_angle60.0_tilt0.0_tazi180.0	0.59	0.77	1.5	60	0	180	-8133.72	-8102.28	-31.6312	0.190198
frame_0795_x0.41_y0.77_z1.5_angle120.0_tilt0.0_tazi180.0	0.41	0.77	1.5	120	0	180	-8133.72	-8102.28	-31.6312	0.190198
frame_1072_x0.59_y0.77_z1.5_angle60.0_tilt0.0_tazi270.0	0.59	0.77	1.5	60	0	270	-8133.72	-8102.28	-31.6312	0.190198
frame_1058_x0.59_y0.77_z1.5_angle0.0_tilt0.0_tazi90.0	0.59	0.77	1.5	0	0	90	-8133.72	-8102.28	-31.6312	0.190198
frame_1069_x0.59_y0.77_z1.5_angle60.0_tilt0.0_tazi0.0	0.59	0.77	1.5	60	0	0	-8133.72	-8102.28	-31.6312	0.190198
frame_1060_x0.59_y0.77_z1.5_angle0.0_tilt0.0_tazi270.0	0.59	0.77	1.5	0	0	270	-8133.72	-8102.28	-31.6312	0.190198
frame_0805_x0.41_y0.77_z1.5_angle180.0_tilt0.0_tazi0.0	0.41	0.77	1.5	180	0	0	-8133.72	-8102.28	-31.6312	0.190198
frame_0793_x0.41_y0.77_z1.5_angle120.0_tilt0.0_tazi0.0	0.41	0.77	1.5	120	0	0	-8133.72	-8102.28	-31.6312	0.190198
frame_1083_x0.59_y0.77_z1.5_angle120.0_tilt0.0_tazi180.0	0.59	0.77	1.5	120	0	180	-8133.72	-8102.28	-31.6312	0.190199
frame_1095_x0.59_y0.77_z1.5_angle180.0_tilt0.0_tazi180.0	0.59	0.77	1.5	180	0	180	-8133.72	-8102.28	-31.6312	0.190199
frame_1093_x0.59_y0.77_z1.5_angle180.0_tilt0.0_tazi0.0	0.59	0.77	1.5	180	0	0	-8133.72	-8102.28	-31.6312	0.190199
frame_1094_x0.59_y0.77_z1.5_angle180.0_tilt0.0_tazi90.0	0.59	0.77	1.5	180	0	90	-8133.72	-8102.28	-31.6312	0.190199
frame_0794_x0.41_y0.77_z1.5_angle120.0_tilt0.0_tazi90.0	0.41	0.77	1.5	120	0	90	-8133.72	-8102.28	-31.6312	0.190199
frame_0770_x0.41_y0.77_z1.5_angle0.0_tilt0.0_tazi90.0	0.41	0.77	1.5	0	0	90	-8133.72	-8102.28	-31.6312	0.190199
frame_0769_x0.41_y0.77_z1.5_angle0.0_tilt0.0_tazi0.0	0.41	0.77	1.5	0	0	0	-8133.72	-8102.28	-31.6312	0.1902
frame_1057_x0.59_y0.77_z1.5_angle0.0_tilt0.0_tazi0.0	0.59	0.77	1.5	0	0	0	-8133.72	-8102.28	-31.6312	0.1902
frame_0784_x0.41_y0.77_z1.5_angle60.0_tilt0.0_tazi270.0	0.41	0.77	1.5	60	0	270	-8133.72	-8102.28	-31.6312	0.1902
frame_0808_x0.41_y0.77_z1.5_angle180.0_tilt0.0_tazi270.0	0.41	0.77	1.5	180	0	270	-8133.72	-8102.28	-31.6312	0.1902
frame_0796_x0.41_y0.77_z1.5_angle120.0_tilt0.0_tazi270.0	0.41	0.77	1.5	120	0	270	-8133.72	-8102.28	-31.6312	0.1902
frame_0783_x0.41_y0.77_z1.5_angle60.0_tilt0.0_tazi180.0	0.41	0.77	1.5	60	0	180	-8133.72	-8102.28	-31.6312	0.190201
frame_0807_x0.41_y0.77_z1.5_angle180.0_tilt0.0_tazi180.0	0.41	0.77	1.5	180	0	180	-8133.72	-8102.28	-31.6312	0.190201
frame_0215_x0.05_y0.77_z1.5_angle60.0_tilt60.0_tazi180.0	0.05	0.77	1.5	60	60	180	-8133.72	-8102.28	-31.6312	0.191932
frame_1665_x0.95_y0.77_z1.5_angle120.0_tilt60.0_tazi0.0	0.95	0.77	1.5	120	60	0	-8133.72	-8102.28	-31.6312	0.191932
frame_0203_x0.05_y0.77_z1.5_angle0.0_tilt60.0_tazi180.0	0.05	0.77	1.5	0	60	180	-8133.72	-8102.28	-31.6312	0.191932
frame_1641_x0.95_y0.77_z1.5_angle0.0_tilt60.0_tazi0.0	0.95	0.77	1.5	0	60	0	-8133.72	-8102.28	-31.6312	0.191932
frame_1677_x0.95_y0.77_z1.5_angle180.0_tilt60.0_tazi0.0	0.95	0.77	1.5	180	60	0	-8133.72	-8102.28	-31.6312	0.191933
frame_0227_x0.05_y0.77_z1.5_angle120.0_tilt60.0_tazi180.0	0.05	0.77	1.5	120	60	180	-8133.72	-8102.28	-31.6312	0.191933
frame_1653_x0.95_y0.77_z1.5_angle60.0_tilt60.0_tazi0.0	0.95	0.77	1.5	60	60	0	-8133.72	-8102.28	-31.6312	0.191933
frame_0239_x0.05_y0.77_z1.5_angle180.0_tilt60.0_tazi180.0	0.05	0.77	1.5	180	60	180	-8133.72	-8102.28	-31.6312	0.191934
frame_1689_x0.95_y0.95_z1.5_angle0.0_tilt60.0_tazi0.0	0.95	0.95	1.5	0	60	0	-8133.7	-8102.28	-31.6312	0.207181
frame_1725_x0.95_y0.95_z1.5_angle180.0_tilt60.0_tazi0.0	0.95	0.95	1.5	180	60	0	-8133.7	-8102.28	-31.6312	0.207181
frame_1713_x0.95_y0.95_z1.5_angle120.0_tilt60.0_tazi0.0	0.95	0.95	1.5	120	60	0	-8133.7	-8102.28	-31.6312	0.207181
frame_0275_x0.05_y0.95_z1.5_angle120.0_tilt60.0_tazi180.0	0.05	0.95	1.5	120	60	180	-8133.7	-8102.28	-31.6312	0.207181
frame_1701_x0.95_y0.95_z1.5_angle60.0_tilt60.0_tazi0.0	0.95	0.95	1.5	60	60	0	-8133.7	-8102.28	-31.6312	0.207183
frame_0263_x0.05_y0.95_z1.5_angle60.0_tilt60.0_tazi180.0	0.05	0.95	1.5	60	60	180	-8133.7	-8102.28	-31.6312	0.20719
frame_0251_x0.05_y0.95_z1.5_angle0.0_tilt60.0_tazi180.0	0.05	0.95	1.5	0	60	180	-8133.7	-8102.28	-31.6312	0.20719
frame_0287_x0.05_y0.95_z1.5_angle180.0_tilt60.0_tazi180.0	0.05	0.95	1.5	180	60	180	-8133.7	-8102.28	-31.6312	0.20719
frame_1284_x0.77_y0.41_z1.5_angle120.0_tilt60.0_tazi270.0	0.77	0.41	1.5	120	60	270	-8133.7	-8102.28	-31.6312	0.208302
frame_0432_x0.23_y0.41_z1.5_angle180.0_tilt60.0_tazi270.0	0.23	0.41	1.5	180	60	270	-8133.7	-8102.28	-31.6312	0.208303
frame_1260_x0.77_y0.41_z1.5_angle0.0_tilt60.0_tazi270.0	0.77	0.41	1.5	0	60	270	-8133.7	-8102.28	-31.6312	0.208303
frame_0396_x0.23_y0.41_z1.5_angle0.0_tilt60.0_tazi270.0	0.23	0.41	1.5	0	60	270	-8133.7	-8102.28	-31.6312	0.208303
frame_0420_x0.23_y0.41_z1.5_angle120.0_tilt60.0_tazi270.0	0.23	0.41	1.5	120	60	270	-8133.7	-8102.28	-31.6312	0.208303
frame_0408_x0.23_y0.41_z1.5_angle60.0_tilt60.0_tazi270.0	0.23	0.41	1.5	60	60	270	-8133.7	-8102.28	-31.6312	0.208304
frame_1272_x0.77_y0.41_z1.5_angle60.0_tilt60.0_tazi270.0	0.77	0.41	1.5	60	60	270	-8133.7	-8102.28	-31.6312	0.208304
frame_1296_x0.77_y0.41_z1.5_angle180.0_tilt60.0_tazi270.0	0.77	0.41	1.5	180	60	270	-8133.7	-8102.28	-31.6312	0.208305
frame_1493_x0.95_y0.23_z1.5_angle0.0_tilt30.0_tazi0.0	0.95	0.23	1.5	0	30	0	-8133.69	-8102.28	-31.6312	0.220412
frame_1517_x0.95_y0.23_z1.5_angle120.0_tilt30.0_tazi0.0	0.95	0.23	1.5	120	30	0	-8133.69	-8102.28	-31.6312	0.220412
frame_1529_x0.95_y0.23_z1.5_angle180.0_tilt30.0_tazi0.0	0.95	0.23	1.5	180	30	0	-8133.69	-8102.28	-31.6312	0.220413
frame_1505_x0.95_y0.23_z1.5_angle60.0_tilt30.0_tazi0.0	0.95	0.23	1.5	60	30	0	-8133.69	-8102.28	-31.6312	0.220413
frame_0079_x0.05_y0.23_z1.5_angle120.0_tilt30.0_tazi180.0	0.05	0.23	1.5	120	30	180	-8133.69	-8102.28	-31.6312	0.220413
frame_0067_x0.05_y0.23_z1.5_angle60.0_tilt30.0_tazi180.0	0.05	0.23	1.5	60	30	180	-8133.69	-8102.28	-31.6312	0.220414
frame_0091_x0.05_y0.23_z1.5_angle180.0_tilt30.0_tazi180.0	0.05	0.23	1.5	180	30	180	-8133.69	-8102.28	-31.6312	0.220414
frame_0055_x0.05_y0.23_z1.5_angle0.0_tilt30.0_tazi180.0	0.05	0.23	1.5	0	30	180	-8133.69	-8102.28	-31.6312	0.220418
frame_1533_x0.95_y0.23_z1.5_angle180.0_tilt60.0_tazi0.0	0.95	0.23	1.5	180	60	0	-8133.68	-8102.28	-31.6312	0.228784
frame_1497_x0.95_y0.23_z1.5_angle0.0_tilt60.0_tazi0.0	0.95	0.23	1.5	0	60	0	-8133.68	-8102.28	-31.6312	0.228785
frame_0083_x0.05_y0.23_z1.5_angle120.0_tilt60.0_tazi180.0	0.05	0.23	1.5	120	60	180	-8133.68	-8102.28	-31.6312	0.228786
frame_1509_x0.95_y0.23_z1.5_angle60.0_tilt60.0_tazi0.0	0.95	0.23	1.5	60	60	0	-8133.68	-8102.28	-31.6312	0.228786
frame_0095_x0.05_y0.23_z1.5_angle180.0_tilt60.0_tazi180.0	0.05	0.23	1.5	180	60	180	-8133.68	-8102.28	-31.6312	0.228787
frame_0071_x0.05_y0.23_z1.5_angle60.0_tilt60.0_tazi180.0	0.05	0.23	1.5	60	60	180	-8133.68	-8102.28	-31.6312	0.228787
frame_1521_x0.95_y0.23_z1.5_angle120.0_tilt60.0_tazi0.0	0.95	0.23	1.5	120	60	0	-8133.68	-8102.28	-31.6312	0.228788
frame_0059_x0.05_y0.23_z1.5_angle0.0_tilt60.0_tazi180.0	0.05	0.23	1.5	0	60	180	-8133.68	-8102.28	-31.6312	0.228788
frame_0072_x0.05_y0.23_z1.5_angle60.0_tilt60.0_tazi270.0	0.05	0.23	1.5	60	60	270	-8133.67	-8102.28	-31.6312	0.239096
frame_1512_x0.95_y0.23_z1.5_angle60.0_tilt60.0_tazi270.0	0.95	0.23	1.5	60	60	270	-8133.67	-8102.28	-31.6312	0.239097
frame_0084_x0.05_y0.23_z1.5_angle120.0_tilt60.0_tazi270.0	0.05	0.23	1.5	120	60	270	-8133.67	-8102.28	-31.6312	0.239097
frame_0060_x0.05_y0.23_z1.5_angle0.0_tilt60.0_tazi270.0	0.05	0.23	1.5	0	60	270	-8133.67	-8102.28	-31.6312	0.239097
frame_0096_x0.05_y0.23_z1.5_angle180.0_tilt60.0_tazi270.0	0.05	0.23	1.5	180	60	270	-8133.67	-8102.28	-31.6312	0.239098
frame_1536_x0.95_y0.23_z1.5_angle180.0_tilt60.0_tazi270.0	0.95	0.23	1.5	180	60	270	-8133.67	-8102.28	-31.6312	0.239098
frame_1500_x0.95_y0.23_z1.5_angle0.0_tilt60.0_tazi270.0	0.95	0.23	1.5	0	60	270	-8133.67	-8102.28	-31.6312	0.239098
frame_1524_x0.95_y0.23_z1.5_angle120.0_tilt60.0_tazi270.0	0.95	0.23	1.5	120	60	270	-8133.67	-8102.28	-31.6312	0.239099
frame_0056_x0.05_y0.23_z1.5_angle0.0_tilt30.0_tazi270.0	0.05	0.23	1.5	0	30	270	-8133.67	-8102.28	-31.6312	0.241278
frame_1496_x0.95_y0.23_z1.5_angle0.0_tilt30.0_tazi270.0	0.95	0.23	1.5	0	30	270	-8133.67	-8102.28	-31.6312	0.241279
frame_1508_x0.95_y0.23_z1.5_angle60.0_tilt30.0_tazi270.0	0.95	0.23	1.5	60	30	270	-8133.67	-8102.28	-31.6312	0.241279
frame_0080_x0.05_y0.23_z1.5_angle120.0_tilt30.0_tazi270.0	0.05	0.23	1.5	120	30	270	-8133.67	-8102.28	-31.6312	0.241279
frame_1520_x0.95_y0.23_z1.5_angle120.0_tilt30.0_tazi270.0	0.95	0.23	1.5	120	30	270	-8133.67	-8102.28	-31.6312	0.241279
frame_0068_x0.05_y0.23_z1.5_angle60.0_tilt30.0_tazi270.0	0.05	0.23	1.5	60	30	270	-8133.67	-8102.28	-31.6312	0.241281
frame_0092_x0.05_y0.23_z1.5_angle180.0_tilt30.0_tazi270.0	0.05	0.23	1.5	180	30	270	-8133.67	-8102.28	-31.6312	0.241281
frame_1532_x0.95_y0.23_z1.5_angle180.0_tilt30.0_tazi270.0	0.95	0.23	1.5	180	30	270	-8133.67	-8102.28	-31.6312	0.241282
frame_0671_x0.41_y0.23_z1.5_angle180.0_tilt60.0_tazi180.0	0.41	0.23	1.5	180	60	180	-8133.66	-8102.28	-31.6312	0.250868
frame_0933_x0.59_y0.23_z1.5_angle60.0_tilt60.0_tazi0.0	0.59	0.23	1.5	60	60	0	-8133.66	-8102.28	-31.6312	0.250868
frame_0659_x0.41_y0.23_z1.5_angle120.0_tilt60.0_tazi180.0	0.41	0.23	1.5	120	60	180	-8133.66	-8102.28	-31.6312	0.250869
frame_0957_x0.59_y0.23_z1.5_angle180.0_tilt60.0_tazi0.0	0.59	0.23	1.5	180	60	0	-8133.66	-8102.28	-31.6312	0.250869
frame_0647_x0.41_y0.23_z1.5_angle60.0_tilt60.0_tazi180.0	0.41	0.23	1.5	60	60	180	-8133.66	-8102.28	-31.6312	0.250869
frame_0921_x0.59_y0.23_z1.5_angle0.0_tilt60.0_tazi0.0	0.59	0.23	1.5	0	60	0	-8133.66	-8102.28	-31.6312	0.25087
frame_0945_x0.59_y0.23_z1.5_angle120.0_tilt60.0_tazi0.0	0.59	0.23	1.5	120	60	0	-8133.66	-8102.28	-31.6312	0.25087
frame_0635_x0.41_y0.23_z1.5_angle0.0_tilt60.0_tazi180.0	0.41	0.23	1.5	0	60	180	-8133.66	-8102.28	-31.6312	0.25087
frame_0352_x0.23_y0.23_z1.5_angle60.0_tilt0.0_tazi270.0	0.23	0.23	1.5	60	0	270	-8133.64	-8102.28	-31.6312	0.270135
frame_1226_x0.77_y0.23_z1.5_angle120.0_tilt0.0_tazi90.0	0.77	0.23	1.5	120	0	90	-8133.64	-8102.28	-31.6312	0.270135
frame_1213_x0.77_y0.23_z1.5_angle60.0_tilt0.0_tazi0.0	0.77	0.23	1.5	60	0	0	-8133.64	-8102.28	-31.6312	0.270135
frame_0338_x0.23_y0.23_z1.5_angle0.0_tilt0.0_tazi90.0	0.23	0.23	1.5	0	0	90	-8133.64	-8102.28	-31.6312	0.270135
frame_1215_x0.77_y0.23_z1.5_angle60.0_tilt0.0_tazi180.0	0.77	0.23	1.5	60	0	180	-8133.64	-8102.28	-31.6312	0.270135
frame_1240_x0.77_y0.23_z1.5_angle180.0_tilt0.0_tazi270.0	0.77	0.23	1.5	180	0	270	-8133.64	-8102.28	-31.6312	0.270136
frame_0337_x0.23_y0.23_z1.5_angle0.0_tilt0.0_tazi0.0	0.23	0.23	1.5	0	0	0	-8133.64	-8102.28	-31.6312	0.270136
frame_1201_x0.77_y0.23_z1.5_angle0.0_tilt0.0_tazi0.0	0.77	0.23	1.5	0	0	0	-8133.64	-8102.28	-31.6312	0.270136
frame_1225_x0.77_y0.23_z1.5_angle120.0_tilt0.0_tazi0.0	0.77	0.23	1.5	120	0	0	-8133.64	-8102.28	-31.6312	0.270136
frame_0339_x0.23_y0.23_z1.5_angle0.0_tilt0.0_tazi180.0	0.23	0.23	1.5	0	0	180	-8133.64	-8102.28	-31.6312	0.270136
frame_0375_x0.23_y0.23_z1.5_angle180.0_tilt0.0_tazi180.0	0.23	0.23	1.5	180	0	180	-8133.64	-8102.28	-31.6312	0.270136
frame_1214_x0.77_y0.23_z1.5_angle60.0_tilt0.0_tazi90.0	0.77	0.23	1.5	60	0	90	-8133.64	-8102.28	-31.6312	0.270136
frame_0362_x0.23_y0.23_z1.5_angle120.0_tilt0.0_tazi90.0	0.23	0.23	1.5	120	0	90	-8133.64	-8102.28	-31.6312	0.270136
frame_0351_x0.23_y0.23_z1.5_angle60.0_tilt0.0_tazi180.0	0.23	0.23	1.5	60	0	180	-8133.64	-8102.28	-31.6312	0.270136
frame_1202_x0.77_y0.23_z1.5_angle0.0_tilt0.0_tazi90.0	0.77	0.23	1.5	0	0	90	-8133.64	-8102.28	-31.6312	0.270136
frame_0349_x0.23_y0.23_z1.5_angle60.0_tilt0.0_tazi0.0	0.23	0.23	1.5	60	0	0	-8133.64	-8102.28	-31.6312	0.270137
frame_0374_x0.23_y0.23_z1.5_angle180.0_tilt0.0_tazi90.0	0.23	0.23	1.5	180	0	90	-8133.64	-8102.28	-31.6312	0.270137
frame_1237_x0.77_y0.23_z1.5_angle180.0_tilt0.0_tazi0.0	0.77	0.23	1.5	180	0	0	-8133.64	-8102.28	-31.6312	0.270137
frame_1228_x0.77_y0.23_z1.5_angle120.0_tilt0.0_tazi270.0	0.77	0.23	1.5	120	0	270	-8133.64	-8102.28	-31.6312	0.270138
frame_1238_x0.77_y0.23_z1.5_angle180.0_tilt0.0_tazi90.0	0.77	0.23	1.5	180	0	90	-8133.64	-8102.28	-31.6312	0.270138
frame_1239_x0.77_y0.23_z1.5_angle180.0_tilt0.0_tazi180.0	0.77	0.23	1.5	180	0	180	-8133.64	-8102.28	-31.6312	0.270138
frame_0363_x0.23_y0.23_z1.5_angle120.0_tilt0.0_tazi180.0	0.23	0.23	1.5	120	0	180	-8133.64	-8102.28	-31.6312	0.270139
frame_0376_x0.23_y0.23_z1.5_angle180.0_tilt0.0_tazi270.0	0.23	0.23	1.5	180	0	270	-8133.64	-8102.28	-31.6312	0.27014
frame_0350_x0.23_y0.23_z1.5_angle60.0_tilt0.0_tazi90.0	0.23	0.23	1.5	60	0	90	-8133.64	-8102.28	-31.6312	0.27014
frame_1204_x0.77_y0.23_z1.5_angle0.0_tilt0.0_tazi270.0	0.77	0.23	1.5	0	0	270	-8133.64	-8102.28	-31.6312	0.27014
frame_1203_x0.77_y0.23_z1.5_angle0.0_tilt0.0_tazi180.0	0.77	0.23	1.5	0	0	180	-8133.64	-8102.28	-31.6312	0.270141
frame_1216_x0.77_y0.23_z1.5_angle60.0_tilt0.0_tazi270.0	0.77	0.23	1.5	60	0	270	-8133.64	-8102.28	-31.6312	0.270141
frame_1227_x0.77_y0.23_z1.5_angle120.0_tilt0.0_tazi180.0	0.77	0.23	1.5	120	0	180	-8133.64	-8102.28	-31.6312	0.270141
frame_0340_x0.23_y0.23_z1.5_angle0.0_tilt0.0_tazi270.0	0.23	0.23	1.5	0	0	270	-8133.64	-8102.28	-31.6312	0.270141
frame_0361_x0.23_y0.23_z1.5_angle120.0_tilt0.0_tazi0.0	0.23	0.23	1.5	120	0	0	-8133.64	-8102.28	-31.6312	0.270141
frame_0364_x0.23_y0.23_z1.5_angle120.0_tilt0.0_tazi270.0	0.23	0.23	1.5	120	0	270	-8133.64	-8102.28	-31.6312	0.270141
frame_0373_x0.23_y0.23_z1.5_angle180.0_tilt0.0_tazi0.0	0.23	0.23	1.5	180	0	0	-8133.64	-8102.28	-31.6312	0.270142
frame_1440_x0.77_y0.95_z1.5_angle180.0_tilt60.0_tazi270.0	0.77	0.95	1.5	180	60	270	-8133.64	-8102.28	-31.6312	0.27299
frame_1428_x0.77_y0.95_z1.5_angle120.0_tilt60.0_tazi270.0	0.77	0.95	1.5	120	60	270	-8133.64	-8102.28	-31.6312	0.27299
frame_0552_x0.23_y0.95_z1.5_angle60.0_tilt60.0_tazi270.0	0.23	0.95	1.5	60	60	270	-8133.64	-8102.28	-31.6312	0.272991
frame_0540_x0.23_y0.95_z1.5_angle0.0_tilt60.0_tazi270.0	0.23	0.95	1.5	0	60	270	-8133.64	-8102.28	-31.6312	0.272992
frame_1404_x0.77_y0.95_z1.5_angle0.0_tilt60.0_tazi270.0	0.77	0.95	1.5	0	60	270	-8133.64	-8102.28	-31.6312	0.272992
frame_0564_x0.23_y0.95_z1.5_angle120.0_tilt60.0_tazi270.0	0.23	0.95	1.5	120	60	270	-8133.64	-8102.28	-31.6312	0.272992
frame_1416_x0.77_y0.95_z1.5_angle60.0_tilt60.0_tazi270.0	0.77	0.95	1.5	60	60	270	-8133.64	-8102.28	-31.6312	0.272993
frame_0576_x0.23_y0.95_z1.5_angle180.0_tilt60.0_tazi270.0	0.23	0.95	1.5	180	60	270	-8133.64	-8102.28	-31.6312	0.272996
frame_1076_x0.59_y0.77_z1.5_angle60.0_tilt30.0_tazi270.0	0.59	0.77	1.5	60	30	270	-8133.63	-8102.28	-31.6312	0.277124
frame_1064_x0.59_y0.77_z1.5_angle0.0_tilt30.0_tazi270.0	0.59	0.77	1.5	0	30	270	-8133.63	-8102.28	-31.6312	0.277134
frame_1100_x0.59_y0.77_z1.5_angle180.0_tilt30.0_tazi270.0	0.59	0.77	1.5	180	30	270	-8133.63	-8102.28	-31.6312	0.277135
frame_1088_x0.59_y0.77_z1.5_angle120.0_tilt30.0_tazi270.0	0.59	0.77	1.5	120	30	270	-8133.63	-8102.28	-31.6312	0.277135
frame_0776_x0.41_y0.77_z1.5_angle0.0_tilt30.0_tazi270.0	0.41	0.77	1.5	0	30	270	-8133.63	-8102.28	-31.6312	0.277135
frame_0812_x0.41_y0.77_z1.5_angle180.0_tilt30.0_tazi270.0	0.41	0.77	1.5	180	30	270	-8133.63	-8102.28	-31.6312	0.277136
frame_0788_x0.41_y0.77_z1.5_angle60.0_tilt30.0_tazi270.0	0.41	0.77	1.5	60	30	270	-8133.63	-8102.28	-31.6312	0.277136
frame_0800_x0.41_y0.77_z1.5_angle120.0_tilt30.0_tazi270.0	0.41	0.77	1.5	120	30	270	-8133.63	-8102.28	-31.6312	0.277136
frame_0359_x0.23_y0.23_z1.5_angle60.0_tilt60.0_tazi180.0	0.23	0.23	1.5	60	60	180	-8133.62	-8102.28	-31.6312	0.289343
frame_1221_x0.77_y0.23_z1.5_angle60.0_tilt60.0_tazi0.0	0.77	0.23	1.5	60	60	0	-8133.62	-8102.28	-31.6312	0.289344
frame_1209_x0.77_y0.23_z1.5_angle0.0_tilt60.0_tazi0.0	0.77	0.23	1.5	0	60	0	-8133.62	-8102.28	-31.6312	0.289345
frame_0347_x0.23_y0.23_z1.5_angle0.0_tilt60.0_tazi180.0	0.23	0.23	1.5	0	60	180	-8133.62	-8102.28	-31.6312	0.289345
frame_0371_x0.23_y0.23_z1.5_angle120.0_tilt60.0_tazi180.0	0.23	0.23	1.5	120	60	180	-8133.62	-8102.28	-31.6312	0.289346
frame_1233_x0.77_y0.23_z1.5_angle120.0_tilt60.0_tazi0.0	0.77	0.23	1.5	120	60	0	-8133.62	-8102.28	-31.6312	0.289346
frame_1245_x0.77_y0.23_z1.5_angle180.0_tilt60.0_tazi0.0	0.77	0.23	1.5	180	60	0	-8133.62	-8102.28	-31.6312	0.289346
frame_0383_x0.23_y0.23_z1.5_angle180.0_tilt60.0_tazi180.0	0.23	0.23	1.5	180	60	180	-8133.62	-8102.28	-31.6312	0.289347
frame_0931_x0.59_y0.23_z1.5_angle60.0_tilt30.0_tazi180.0	0.59	0.23	1.5	60	30	180	-8133.57	-8102.28	-31.6312	0.342198
frame_0653_x0.41_y0.23_z1.5_angle120.0_tilt30.0_tazi0.0	0.41	0.23	1.5	120	30	0	-8133.57	-8102.28	-31.6312	0.342198
frame_0665_x0.41_y0.23_z1.5_angle180.0_tilt30.0_tazi0.0	0.41	0.23	1.5	180	30	0	-8133.57	-8102.28	-31.6312	0.342198
frame_0629_x0.41_y0.23_z1.5_angle0.0_tilt30.0_tazi0.0	0.41	0.23	1.5	0	30	0	-8133.57	-8102.28	-31.6312	0.342198
frame_0955_x0.59_y0.23_z1.5_angle180.0_tilt30.0_tazi180.0	0.59	0.23	1.5	180	30	180	-8133.57	-8102.28	-31.6312	0.342198
frame_0641_x0.41_y0.23_z1.5_angle60.0_tilt30.0_tazi0.0	0.41	0.23	1.5	60	30	0	-8133.57	-8102.28	-31.6312	0.342198
frame_0943_x0.59_y0.23_z1.5_angle120.0_tilt30.0_tazi180.0	0.59	0.23	1.5	120	30	180	-8133.57	-8102.28	-31.6312	0.342199
frame_0919_x0.59_y0.23_z1.5_angle0.0_tilt30.0_tazi180.0	0.59	0.23	1.5	0	30	180	-8133.57	-8102.28	-31.6312	0.342199
frame_0996_x0.59_y0.41_z1.5_angle120.0_tilt60.0_tazi270.0	0.59	0.41	1.5	120	60	270	-8133.56	-8102.28	-31.6312	0.351177
frame_0984_x0.59_y0.41_z1.5_angle60.0_tilt60.0_tazi270.0	0.59	0.41	1.5	60	60	270	-8133.56	-8102.28	-31.6312	0.351178
frame_0720_x0.41_y0.41_z1.5_angle180.0_tilt60.0_tazi270.0	0.41	0.41	1.5	180	60	270	-8133.56	-8102.28	-31.6312	0.351179
frame_0696_x0.41_y0.41_z1.5_angle60.0_tilt60.0_tazi270.0	0.41	0.41	1.5	60	60	270	-8133.56	-8102.28	-31.6312	0.351179
frame_1008_x0.59_y0.41_z1.5_angle180.0_tilt60.0_tazi270.0	0.59	0.41	1.5	180	60	270	-8133.56	-8102.28	-31.6312	0.351179
frame_0708_x0.41_y0.41_z1.5_angle120.0_tilt60.0_tazi270.0	0.41	0.41	1.5	120	60	270	-8133.56	-8102.28	-31.6312	0.351179
frame_0972_x0.59_y0.41_z1.5_angle0.0_tilt60.0_tazi270.0	0.59	0.41	1.5	0	60	270	-8133.56	-8102.28	-31.6312	0.351179
frame_0684_x0.41_y0.41_z1.5_angle0.0_tilt60.0_tazi270.0	0.41	0.41	1.5	0	60	270	-8133.56	-8102.28	-31.6312	0.35118
frame_1103_x0.59_y0.77_z1.5_angle180.0_tilt60.0_tazi180.0	0.59	0.77	1.5	180	60	180	-8133.54	-8102.28	-31.6312	0.37301
frame_0777_x0.41_y0.77_z1.5_angle0.0_tilt60.0_tazi0.0	0.41	0.77	1.5	0	60	0	-8133.54	-8102.28	-31.6312	0.37301
frame_1079_x0.59_y0.77_z1.5_angle60.0_tilt60.0_tazi180.0	0.59	0.77	1.5	60	60	180	-8133.54	-8102.28	-31.6312	0.373011
frame_0789_x0.41_y0.77_z1.5_angle60.0_tilt60.0_tazi0.0	0.41	0.77	1.5	60	60	0	-8133.54	-8102.28	-31.6312	0.373012
frame_0801_x0.41_y0.77_z1.5_angle120.0_tilt60.0_tazi0.0	0.41	0.77	1.5	120	60	0	-8133.54	-8102.28	-31.6312	0.373013
frame_0813_x0.41_y0.77_z1.5_angle180.0_tilt60.0_tazi0.0	0.41	0.77	1.5	180	60	0	-8133.54	-8102.28	-31.6312	0.373013
frame_1067_x0.59_y0.77_z1.5_angle0.0_tilt60.0_tazi180.0	0.59	0.77	1.5	0	60	180	-8133.54	-8102.28	-31.6312	0.373014
frame_1091_x0.59_y0.77_z1.5_angle120.0_tilt60.0_tazi180.0	0.59	0.77	1.5	120	60	180	-8133.54	-8102.28	-31.6312	0.373014
frame_1075_x0.59_y0.77_z1.5_angle60.0_tilt30.0_tazi180.0	0.59	0.77	1.5	60	30	180	-8133.52	-8102.28	-31.6312	0.394417
frame_0809_x0.41_y0.77_z1.5_angle180.0_tilt30.0_tazi0.0	0.41	0.77	1.5	180	30	0	-8133.52	-8102.28	-31.6312	0.394418
frame_0797_x0.41_y0.77_z1.5_angle120.0_tilt30.0_tazi0.0	0.41	0.77	1.5	120	30	0	-8133.52	-8102.28	-31.6312	0.394419
frame_0785_x0.41_y0.77_z1.5_angle60.0_tilt30.0_tazi0.0	0.41	0.77	1.5	60	30	0	-8133.52	-8102.28	-31.6312	0.394419
frame_1099_x0.59_y0.77_z1.5_angle180.0_tilt30.0_tazi180.0	0.59	0.77	1.5	180	30	180	-8133.52	-8102.28	-31.6312	0.394419
frame_1063_x0.59_y0.77_z1.5_angle0.0_tilt30.0_tazi180.0	0.59	0.77	1.5	0	30	180	-8133.52	-8102.28	-31.6312	0.39442
frame_1087_x0.59_y0.77_z1.5_angle120.0_tilt30.0_tazi180.0	0.59	0.77	1.5	120	30	180	-8133.52	-8102.28	-31.6312	0.39442
frame_0773_x0.41_y0.77_z1.5_angle0.0_tilt30.0_tazi0.0	0.41	0.77	1.5	0	30	0	-8133.52	-8102.28	-31.6312	0.39442
frame_1217_x0.77_y0.23_z1.5_angle60.0_tilt30.0_tazi0.0	0.77	0.23	1.5	60	30	0	-8133.49	-8102.28	-31.6312	0.422546
frame_0343_x0.23_y0.23_z1.5_angle0.0_tilt30.0_tazi180.0	0.23	0.23	1.5	0	30	180	-8133.49	-8102.28	-31.6312	0.422549
frame_1229_x0.77_y0.23_z1.5_angle120.0_tilt30.0_tazi0.0	0.77	0.23	1.5	120	30	0	-8133.49	-8102.28	-31.6312	0.422549
frame_1241_x0.77_y0.23_z1.5_angle180.0_tilt30.0_tazi0.0	0.77	0.23	1.5	180	30	0	-8133.49	-8102.28	-31.6312	0.422549
frame_0355_x0.23_y0.23_z1.5_angle60.0_tilt30.0_tazi180.0	0.23	0.23	1.5	60	30	180	-8133.49	-8102.28	-31.6312	0.42255
frame_0367_x0.23_y0.23_z1.5_angle120.0_tilt30.0_tazi180.0	0.23	0.23	1.5	120	30	180	-8133.49	-8102.28	-31.6312	0.42255
frame_1205_x0.77_y0.23_z1.5_angle0.0_tilt30.0_tazi0.0	0.77	0.23	1.5	0	30	0	-8133.49	-8102.28	-31.6312	0.422551
frame_0379_x0.23_y0.23_z1.5_angle180.0_tilt30.0_tazi180.0	0.23	0.23	1.5	180	30	180	-8133.49	-8102.28	-31.6312	0.422551
frame_0011_x0.05_y0.05_z1.5_angle0.0_tilt60.0_tazi180.0	0.05	0.05	1.5	0	60	180	-8133.49	-8102.28	-31.6312	0.423854
frame_1485_x0.95_y0.05_z1.5_angle180.0_tilt60.0_tazi0.0	0.95	0.05	1.5	180	60	0	-8133.49	-8102.28	-31.6312	0.423855
frame_1461_x0.95_y0.05_z1.5_angle60.0_tilt60.0_tazi0.0	0.95	0.05	1.5	60	60	0	-8133.49	-8102.28	-31.6312	0.423856
frame_0023_x0.05_y0.05_z1.5_angle60.0_tilt60.0_tazi180.0	0.05	0.05	1.5	60	60	180	-8133.49	-8102.28	-31.6312	0.423861
frame_1473_x0.95_y0.05_z1.5_angle120.0_tilt60.0_tazi0.0	0.95	0.05	1.5	120	60	0	-8133.49	-8102.28	-31.6312	0.423861
frame_1449_x0.95_y0.05_z1.5_angle0.0_tilt60.0_tazi0.0	0.95	0.05	1.5	0	60	0	-8133.49	-8102.28	-31.6312	0.423862
frame_0047_x0.05_y0.05_z1.5_angle180.0_tilt60.0_tazi180.0	0.05	0.05	1.5	180	60	180	-8133.49	-8102.28	-31.6312	0.423863
frame_0035_x0.05_y0.05_z1.5_angle120.0_tilt60.0_tazi180.0	0.05	0.05	1.5	120	60	180	-8133.49	-8102.28	-31.6312	0.423863
frame_0360_x0.23_y0.23_z1.5_angle60.0_tilt60.0_tazi270.0	0.23	0.23	1.5	60	60	270	-8133.49	-8102.28	-31.6312	0.424217
frame_1236_x0.77_y0.23_z1.5_angle120.0_tilt60.0_tazi270.0	0.77	0.23	1.5	120	60	270	-8133.49	-8102.28	-31.6312	0.424217
frame_1224_x0.77_y0.23_z1.5_angle60.0_tilt60.0_tazi270.0	0.77	0.23	1.5	60	60	270	-8133.49	-8102.28	-31.6312	0.424217
frame_1248_x0.77_y0.23_z1.5_angle180.0_tilt60.0_tazi270.0	0.77	0.23	1.5	180	60	270	-8133.49	-8102.28	-31.6312	0.424218
frame_0384_x0.23_y0.23_z1.5_angle180.0_tilt60.0_tazi270.0	0.23	0.23	1.5	180	60	270	-8133.49	-8102.28	-31.6312	0.424219
frame_1212_x0.77_y0.23_z1.5_angle0.0_tilt60.0_tazi270.0	0.77	0.23	1.5	0	60	270	-8133.49	-8102.28	-31.6312	0.424219
frame_0372_x0.23_y0.23_z1.5_angle120.0_tilt60.0_tazi270.0	0.23	0.23	1.5	120	60	270	-8133.49	-8102.28	-31.6312	0.424219
frame_0348_x0.23_y0.23_z1.5_angle0.0_tilt60.0_tazi270.0	0.23	0.23	1.5	0	60	270	-8133.49	-8102.28	-31.6312	0.424226
frame_0971_x0.59_y0.41_z1.5_angle0.0_tilt60.0_tazi180.0	0.59	0.41	1.5	0	60	180	-8133.45	-8102.28	-31.6312	0.454814
frame_0693_x0.41_y0.41_z1.5_angle60.0_tilt60.0_tazi0.0	0.41	0.41	1.5	60	60	0	-8133.45	-8102.28	-31.6312	0.454814
frame_0983_x0.59_y0.41_z1.5_angle60.0_tilt60.0_tazi180.0	0.59	0.41	1.5	60	60	180	-8133.45	-8102.28	-31.6312	0.454814
frame_0705_x0.41_y0.41_z1.5_angle120.0_tilt60.0_tazi0.0	0.41	0.41	1.5	120	60	0	-8133.45	-8102.28	-31.6312	0.454815
frame_0995_x0.59_y0.41_z1.5_angle120.0_tilt60.0_tazi180.0	0.59	0.41	1.5	120	60	180	-8133.45	-8102.28	-31.6312	0.454815
frame_0681_x0.41_y0.41_z1.5_angle0.0_tilt60.0_tazi0.0	0.41	0.41	1.5	0	60	0	-8133.45	-8102.28	-31.6312	0.454817
frame_1007_x0.59_y0.41_z1.5_angle180.0_tilt60.0_tazi180.0	0.59	0.41	1.5	180	60	180	-8133.45	-8102.28	-31.6312	0.454817
frame_0717_x0.41_y0.41_z1.5_angle180.0_tilt60.0_tazi0.0	0.41	0.41	1.5	180	60	0	-8133.45	-8102.28	-31.6312	0.454817
frame_1451_x0.95_y0.05_z1.5_angle0.0_tilt60.0_tazi180.0	0.95	0.05	1.5	0	60	180	-8133.45	-8102.28	-31.6312	0.462275
frame_1463_x0.95_y0.05_z1.5_angle60.0_tilt60.0_tazi180.0	0.95	0.05	1.5	60	60	180	-8133.45	-8102.28	-31.6312	0.462276
frame_1475_x0.95_y0.05_z1.5_angle120.0_tilt60.0_tazi180.0	0.95	0.05	1.5	120	60	180	-8133.45	-8102.28	-31.6312	0.462276
frame_0021_x0.05_y0.05_z1.5_angle60.0_tilt60.0_tazi0.0	0.05	0.05	1.5	60	60	0	-8133.45	-8102.28	-31.6312	0.462276
frame_0033_x0.05_y0.05_z1.5_angle120.0_tilt60.0_tazi0.0	0.05	0.05	1.5	120	60	0	-8133.45	-8102.28	-31.6312	0.462277
frame_1487_x0.95_y0.05_z1.5_angle180.0_tilt60.0_tazi180.0	0.95	0.05	1.5	180	60	180	-8133.45	-8102.28	-31.6312	0.462277
frame_0009_x0.05_y0.05_z1.5_angle0.0_tilt60.0_tazi0.0	0.05	0.05	1.5	0	60	0	-8133.45	-8102.28	-31.6312	0.462277
frame_0045_x0.05_y0.05_z1.5_angle180.0_tilt60.0_tazi0.0	0.05	0.05	1.5	180	60	0	-8133.45	-8102.28	-31.6312	0.462277
frame_1662_x0.95_y0.77_z1.5_angle120.0_tilt30.0_tazi90.0	0.95	0.77	1.5	120	30	90	-8133.4	-8102.28	-31.6312	0.505623
frame_1674_x0.95_y0.77_z1.5_angle180.0_tilt30.0_tazi90.0	0.95	0.77	1.5	180	30	90	-8133.4	-8102.28	-31.6312	0.505624
frame_1638_x0.95_y0.77_z1.5_angle0.0_tilt30.0_tazi90.0	0.95	0.77	1.5	0	30	90	-8133.4	-8102.28	-31.6312	0.505624
frame_0210_x0.05_y0.77_z1.5_angle60.0_tilt30.0_tazi90.0	0.05	0.77	1.5	60	30	90	-8133.4	-8102.28	-31.6312	0.505624
frame_1650_x0.95_y0.77_z1.5_angle60.0_tilt30.0_tazi90.0	0.95	0.77	1.5	60	30	90	-8133.4	-8102.28	-31.6312	0.505629
frame_0198_x0.05_y0.77_z1.5_angle0.0_tilt30.0_tazi90.0	0.05	0.77	1.5	0	30	90	-8133.4	-8102.28	-31.6312	0.505629
frame_0222_x0.05_y0.77_z1.5_angle120.0_tilt30.0_tazi90.0	0.05	0.77	1.5	120	30	90	-8133.4	-8102.28	-31.6312	0.50563
frame_0234_x0.05_y0.77_z1.5_angle180.0_tilt30.0_tazi90.0	0.05	0.77	1.5	180	30	90	-8133.4	-8102.28	-31.6312	0.50563
frame_1643_x0.95_y0.77_z1.5_angle0.0_tilt60.0_tazi180.0	0.95	0.77	1.5	0	60	180	-8133.4	-8102.28	-31.6312	0.505806
frame_1655_x0.95_y0.77_z1.5_angle60.0_tilt60.0_tazi180.0	0.95	0.77	1.5	60	60	180	-8133.4	-8102.28	-31.6312	0.505806
frame_0201_x0.05_y0.77_z1.5_angle0.0_tilt60.0_tazi0.0	0.05	0.77	1.5	0	60	0	-8133.4	-8102.28	-31.6312	0.505807
frame_0225_x0.05_y0.77_z1.5_angle120.0_tilt60.0_tazi0.0	0.05	0.77	1.5	120	60	0	-8133.4	-8102.28	-31.6312	0.505807
frame_1667_x0.95_y0.77_z1.5_angle120.0_tilt60.0_tazi180.0	0.95	0.77	1.5	120	60	180	-8133.4	-8102.28	-31.6312	0.505807
frame_1679_x0.95_y0.77_z1.5_angle180.0_tilt60.0_tazi180.0	0.95	0.77	1.5	180	60	180	-8133.4	-8102.28	-31.6312	0.505807
frame_0237_x0.05_y0.77_z1.5_angle180.0_tilt60.0_tazi0.0	0.05	0.77	1.5	180	60	0	-8133.4	-8102.28	-31.6312	0.505807
frame_0213_x0.05_y0.77_z1.5_angle60.0_tilt60.0_tazi0.0	0.05	0.77	1.5	60	60	0	-8133.4	-8102.28	-31.6312	0.505807
frame_1715_x0.95_y0.95_z1.5_angle120.0_tilt60.0_tazi180.0	0.95	0.95	1.5	120	60	180	-8133.4	-8102.28	-31.6312	0.508125
frame_1703_x0.95_y0.95_z1.5_angle60.0_tilt60.0_tazi180.0	0.95	0.95	1.5	60	60	180	-8133.4	-8102.28	-31.6312	0.508125
frame_1727_x0.95_y0.95_z1.5_angle180.0_tilt60.0_tazi180.0	0.95	0.95	1.5	180	60	180	-8133.4	-8102.28	-31.6312	0.508126
frame_0273_x0.05_y0.95_z1.5_angle120.0_tilt60.0_tazi0.0	0.05	0.95	1.5	120	60	0	-8133.4	-8102.28	-31.6312	0.508126
frame_1691_x0.95_y0.95_z1.5_angle0.0_tilt60.0_tazi180.0	0.95	0.95	1.5	0	60	180	-8133.4	-8102.28	-31.6312	0.508126
frame_0261_x0.05_y0.95_z1.5_angle60.0_tilt60.0_tazi0.0	0.05	0.95	1.5	60	60	0	-8133.4	-8102.28	-31.6312	0.508128
frame_0285_x0.05_y0.95_z1.5_angle180.0_tilt60.0_tazi0.0	0.05	0.95	1.5	180	60	0	-8133.4	-8102.28	-31.6312	0.508131
frame_0249_x0.05_y0.95_z1.5_angle0.0_tilt60.0_tazi0.0	0.05	0.95	1.5	0	60	0	-8133.4	-8102.28	-31.6312	0.508144
frame_0425_x0.23_y0.41_z1.5_angle180.0_tilt30.0_tazi0.0	0.23	0.41	1.5	180	30	0	-8133.39	-8102.28	-31.6312	0.518752
frame_1267_x0.77_y0.41_z1.5_angle60.0_tilt30.0_tazi180.0	0.77	0.41	1.5	60	30	180	-8133.39	-8102.28	-31.6312	0.518752
frame_1279_x0.77_y0.41_z1.5_angle120.0_tilt30.0_tazi180.0	0.77	0.41	1.5	120	30	180	-8133.39	-8102.28	-31.6312	0.518752
frame_0413_x0.23_y0.41_z1.5_angle120.0_tilt30.0_tazi0.0	0.23	0.41	1.5	120	30	0	-8133.39	-8102.28	-31.6312	0.518753
frame_1255_x0.77_y0.41_z1.5_angle0.0_tilt30.0_tazi180.0	0.77	0.41	1.5	0	30	180	-8133.39	-8102.28	-31.6312	0.51876
frame_0389_x0.23_y0.41_z1.5_angle0.0_tilt30.0_tazi0.0	0.23	0.41	1.5	0	30	0	-8133.39	-8102.28	-31.6312	0.51876
frame_1291_x0.77_y0.41_z1.5_angle180.0_tilt30.0_tazi180.0	0.77	0.41	1.5	180	30	180	-8133.39	-8102.28	-31.6312	0.518763
frame_0401_x0.23_y0.41_z1.5_angle60.0_tilt30.0_tazi0.0	0.23	0.41	1.5	60	30	0	-8133.39	-8102.28	-31.6312	0.518766
frame_1397_x0.77_y0.95_z1.5_angle0.0_tilt30.0_tazi0.0	0.77	0.95	1.5	0	30	0	-8133.39	-8102.28	-31.6312	0.518954
frame_1433_x0.77_y0.95_z1.5_angle180.0_tilt30.0_tazi0.0	0.77	0.95	1.5	180	30	0	-8133.39	-8102.28	-31.6312	0.518954
frame_0559_x0.23_y0.95_z1.5_angle120.0_tilt30.0_tazi180.0	0.23	0.95	1.5	120	30	180	-8133.39	-8102.28	-31.6312	0.518954
frame_1421_x0.77_y0.95_z1.5_angle120.0_tilt30.0_tazi0.0	0.77	0.95	1.5	120	30	0	-8133.39	-8102.28	-31.6312	0.518954
frame_0535_x0.23_y0.95_z1.5_angle0.0_tilt30.0_tazi180.0	0.23	0.95	1.5	0	30	180	-8133.39	-8102.28	-31.6312	0.518955
frame_0547_x0.23_y0.95_z1.5_angle60.0_tilt30.0_tazi180.0	0.23	0.95	1.5	60	30	180	-8133.39	-8102.28	-31.6312	0.518955
frame_1409_x0.77_y0.95_z1.5_angle60.0_tilt30.0_tazi0.0	0.77	0.95	1.5	60	30	0	-8133.39	-8102.28	-31.6312	0.518955
frame_0571_x0.23_y0.95_z1.5_angle180.0_tilt30.0_tazi180.0	0.23	0.95	1.5	180	30	180	-8133.39	-8102.28	-31.6312	0.518957
frame_0044_x0.05_y0.05_z1.5_angle180.0_tilt30.0_tazi270.0	0.05	0.05	1.5	180	30	270	-8133.39	-8102.28	-31.6312	0.519063
frame_0008_x0.05_y0.05_z1.5_angle0.0_tilt30.0_tazi270.0	0.05	0.05	1.5	0	30	270	-8133.39	-8102.28	-31.6312	0.519064
frame_0020_x0.05_y0.05_z1.5_angle60.0_tilt30.0_tazi270.0	0.05	0.05	1.5	60	30	270	-8133.39	-8102.28	-31.6312	0.519064
frame_0032_x0.05_y0.05_z1.5_angle120.0_tilt30.0_tazi270.0	0.05	0.05	1.5	120	30	270	-8133.39	-8102.28	-31.6312	0.519065
frame_1448_x0.95_y0.05_z1.5_angle0.0_tilt30.0_tazi270.0	0.95	0.05	1.5	0	30	270	-8133.39	-8102.28	-31.6312	0.519068
frame_1484_x0.95_y0.05_z1.5_angle180.0_tilt30.0_tazi270.0	0.95	0.05	1.5	180	30	270	-8133.39	-8102.28	-31.6312	0.519069
frame_1460_x0.95_y0.05_z1.5_angle60.0_tilt30.0_tazi270.0	0.95	0.05	1.5	60	30	270	-8133.39	-8102.28	-31.6312	0.519071
frame_1472_x0.95_y0.05_z1.5_angle120.0_tilt30.0_tazi270.0	0.95	0.05	1.5	120	30	270	-8133.39	-8102.28	-31.6312	0.519072
frame_0368_x0.23_y0.23_z1.5_angle120.0_tilt30.0_tazi270.0	0.23	0.23	1.5	120	30	270	-8133.38	-8102.28	-31.6312	0.526532
frame_0356_x0.23_y0.23_z1.5_angle60.0_tilt30.0_tazi270.0	0.23	0.23	1.5	60	30	270	-8133.38	-8102.28	-31.6312	0.526532
frame_1220_x0.77_y0.23_z1.5_angle60.0_tilt30.0_tazi270.0	0.77	0.23	1.5	60	30	270	-8133.38	-8102.28	-31.6312	0.526533
frame_0380_x0.23_y0.23_z1.5_angle180.0_tilt30.0_tazi270.0	0.23	0.23	1.5	180	30	270	-8133.38	-8102.28	-31.6312	0.526533
frame_1232_x0.77_y0.23_z1.5_angle120.0_tilt30.0_tazi270.0	0.77	0.23	1.5	120	30	270	-8133.38	-8102.28	-31.6312	0.526534
frame_1244_x0.77_y0.23_z1.5_angle180.0_tilt30.0_tazi270.0	0.77	0.23	1.5	180	30	270	-8133.38	-8102.28	-31.6312	0.526534
frame_1208_x0.77_y0.23_z1.5_angle0.0_tilt30.0_tazi270.0	0.77	0.23	1.5	0	30	270	-8133.38	-8102.28	-31.6312	0.526534
frame_0344_x0.23_y0.23_z1.5_angle0.0_tilt30.0_tazi270.0	0.23	0.23	1.5	0	30	270	-8133.38	-8102.28	-31.6312	0.526535
frame_1400_x0.77_y0.95_z1.5_angle0.0_tilt30.0_tazi270.0	0.77	0.95	1.5	0	30	270	-8133.38	-8102.28	-31.6312	0.534414
frame_1412_x0.77_y0.95_z1.5_angle60.0_tilt30.0_tazi270.0	0.77	0.95	1.5	60	30	270	-8133.38	-8102.28	-31.6312	0.534414
frame_1436_x0.77_y0.95_z1.5_angle180.0_tilt30.0_tazi270.0	0.77	0.95	1.5	180	30	270	-8133.38	-8102.28	-31.6312	0.534415
frame_0548_x0.23_y0.95_z1.5_angle60.0_tilt30.0_tazi270.0	0.23	0.95	1.5	60	30	270	-8133.38	-8102.28	-31.6312	0.534416
frame_0572_x0.23_y0.95_z1.5_angle180.0_tilt30.0_tazi270.0	0.23	0.95	1.5	180	30	270	-8133.38	-8102.28	-31.6312	0.534416
frame_0536_x0.23_y0.95_z1.5_angle0.0_tilt30.0_tazi270.0	0.23	0.95	1.5	0	30	270	-8133.38	-8102.28	-31.6312	0.534416
frame_1424_x0.77_y0.95_z1.5_angle120.0_tilt30.0_tazi270.0	0.77	0.95	1.5	120	30	270	-8133.38	-8102.28	-31.6312	0.534416
frame_0560_x0.23_y0.95_z1.5_angle120.0_tilt30.0_tazi270.0	0.23	0.95	1.5	120	30	270	-8133.38	-8102.28	-31.6312	0.534416
frame_0019_x0.05_y0.05_z1.5_angle60.0_tilt30.0_tazi180.0	0.05	0.05	1.5	60	30	180	-8133.36	-8102.28	-31.6312	0.545709
frame_1481_x0.95_y0.05_z1.5_angle180.0_tilt30.0_tazi0.0	0.95	0.05	1.5	180	30	0	-8133.36	-8102.28	-31.6312	0.545709
frame_1469_x0.95_y0.05_z1.5_angle120.0_tilt30.0_tazi0.0	0.95	0.05	1.5	120	30	0	-8133.36	-8102.28	-31.6312	0.545709
frame_1445_x0.95_y0.05_z1.5_angle0.0_tilt30.0_tazi0.0	0.95	0.05	1.5	0	30	0	-8133.36	-8102.28	-31.6312	0.54571
frame_0007_x0.05_y0.05_z1.5_angle0.0_tilt30.0_tazi180.0	0.05	0.05	1.5	0	30	180	-8133.36	-8102.28	-31.6312	0.54571
frame_1457_x0.95_y0.05_z1.5_angle60.0_tilt30.0_tazi0.0	0.95	0.05	1.5	60	30	0	-8133.36	-8102.28	-31.6312	0.545711
frame_0043_x0.05_y0.05_z1.5_angle180.0_tilt30.0_tazi180.0	0.05	0.05	1.5	180	30	180	-8133.36	-8102.28	-31.6312	0.545711
frame_0031_x0.05_y0.05_z1.5_angle120.0_tilt30.0_tazi180.0	0.05	0.05	1.5	120	30	180	-8133.36	-8102.28	-31.6312	0.545715
frame_0012_x0.05_y0.05_z1.5_angle0.0_tilt60.0_tazi270.0	0.05	0.05	1.5	0	60	270	-8133.36	-8102.28	-31.6312	0.553932
frame_1488_x0.95_y0.05_z1.5_angle180.0_tilt60.0_tazi270.0	0.95	0.05	1.5	180	60	270	-8133.36	-8102.28	-31.6312	0.553932
frame_0036_x0.05_y0.05_z1.5_angle120.0_tilt60.0_tazi270.0	0.05	0.05	1.5	120	60	270	-8133.36	-8102.28	-31.6312	0.553932
frame_0024_x0.05_y0.05_z1.5_angle60.0_tilt60.0_tazi270.0	0.05	0.05	1.5	60	60	270	-8133.36	-8102.28	-31.6312	0.553932
frame_1476_x0.95_y0.05_z1.5_angle120.0_tilt60.0_tazi270.0	0.95	0.05	1.5	120	60	270	-8133.36	-8102.28	-31.6312	0.553933
frame_0048_x0.05_y0.05_z1.5_angle180.0_tilt60.0_tazi270.0	0.05	0.05	1.5	180	60	270	-8133.36	-8102.28	-31.6312	0.553933
frame_1464_x0.95_y0.05_z1.5_angle60.0_tilt60.0_tazi270.0	0.95	0.05	1.5	60	60	270	-8133.36	-8102.28	-31.6312	0.553934
frame_1452_x0.95_y0.05_z1.5_angle0.0_tilt60.0_tazi270.0	0.95	0.05	1.5	0	60	270	-8133.36	-8102.28	-31.6312	0.553934
frame_1391_x0.77_y0.77_z1.5_angle180.0_tilt60.0_tazi180.0	0.77	0.77	1.5	180	60	180	-8133.34	-8102.28	-31.6312	0.574171
frame_1355_x0.77_y0.77_z1.5_angle0.0_tilt60.0_tazi180.0	0.77	0.77	1.5	0	60	180	-8133.34	-8102.28	-31.6312	0.574171
frame_0501_x0.23_y0.77_z1.5_angle60.0_tilt60.0_tazi0.0	0.23	0.77	1.5	60	60	0	-8133.34	-8102.28	-31.6312	0.574171
frame_1379_x0.77_y0.77_z1.5_angle120.0_tilt60.0_tazi180.0	0.77	0.77	1.5	120	60	180	-8133.34	-8102.28	-31.6312	0.574171
frame_0513_x0.23_y0.77_z1.5_angle120.0_tilt60.0_tazi0.0	0.23	0.77	1.5	120	60	0	-8133.34	-8102.28	-31.6312	0.574171
frame_0489_x0.23_y0.77_z1.5_angle0.0_tilt60.0_tazi0.0	0.23	0.77	1.5	0	60	0	-8133.34	-8102.28	-31.6312	0.574172
frame_0525_x0.23_y0.77_z1.5_angle180.0_tilt60.0_tazi0.0	0.23	0.77	1.5	180	60	0	-8133.34	-8102.28	-31.6312	0.574172
frame_1367_x0.77_y0.77_z1.5_angle60.0_tilt60.0_tazi180.0	0.77	0.77	1.5	60	60	180	-8133.34	-8102.28	-31.6312	0.574172
frame_1712_x0.95_y0.95_z1.5_angle120.0_tilt30.0_tazi270.0	0.95	0.95	1.5	120	30	270	-8133.33	-8102.28	-31.6312	0.579905
frame_1688_x0.95_y0.95_z1.5_angle0.0_tilt30.0_tazi270.0	0.95	0.95	1.5	0	30	270	-8133.33	-8102.28	-31.6312	0.579905
frame_0248_x0.05_y0.95_z1.5_angle0.0_tilt30.0_tazi270.0	0.05	0.95	1.5	0	30	270	-8133.33	-8102.28	-31.6312	0.579906
frame_0272_x0.05_y0.95_z1.5_angle120.0_tilt30.0_tazi270.0	0.05	0.95	1.5	120	30	270	-8133.33	-8102.28	-31.6312	0.579906
frame_1700_x0.95_y0.95_z1.5_angle60.0_tilt30.0_tazi270.0	0.95	0.95	1.5	60	30	270	-8133.33	-8102.28	-31.6312	0.579906
frame_0260_x0.05_y0.95_z1.5_angle60.0_tilt30.0_tazi270.0	0.05	0.95	1.5	60	30	270	-8133.33	-8102.28	-31.6312	0.579906
frame_0284_x0.05_y0.95_z1.5_angle180.0_tilt30.0_tazi270.0	0.05	0.95	1.5	180	30	270	-8133.33	-8102.28	-31.6312	0.579907
frame_1724_x0.95_y0.95_z1.5_angle180.0_tilt30.0_tazi270.0	0.95	0.95	1.5	180	30	270	-8133.33	-8102.28	-31.6312	0.579907
frame_0029_x0.05_y0.05_z1.5_angle120.0_tilt30.0_tazi0.0	0.05	0.05	1.5	120	30	0	-8133.32	-8102.28	-31.6312	0.589216
frame_1447_x0.95_y0.05_z1.5_angle0.0_tilt30.0_tazi180.0	0.95	0.05	1.5	0	30	180	-8133.32	-8102.28	-31.6312	0.589216
frame_1483_x0.95_y0.05_z1.5_angle180.0_tilt30.0_tazi180.0	0.95	0.05	1.5	180	30	180	-8133.32	-8102.28	-31.6312	0.589216
frame_1471_x0.95_y0.05_z1.5_angle120.0_tilt30.0_tazi180.0	0.95	0.05	1.5	120	30	180	-8133.32	-8102.28	-31.6312	0.589216
frame_0017_x0.05_y0.05_z1.5_angle60.0_tilt30.0_tazi0.0	0.05	0.05	1.5	60	30	0	-8133.32	-8102.28	-31.6312	0.589217
frame_0041_x0.05_y0.05_z1.5_angle180.0_tilt30.0_tazi0.0	0.05	0.05	1.5	180	30	0	-8133.32	-8102.28	-31.6312	0.589217
frame_0005_x0.05_y0.05_z1.5_angle0.0_tilt30.0_tazi0.0	0.05	0.05	1.5	0	30	0	-8133.32	-8102.28	-31.6312	0.589218
frame_1459_x0.95_y0.05_z1.5_angle60.0_tilt30.0_tazi180.0	0.95	0.05	1.5	60	30	180	-8133.32	-8102.28	-31.6312	0.589218
frame_0492_x0.23_y0.77_z1.5_angle0.0_tilt60.0_tazi270.0	0.23	0.77	1.5	0	60	270	-8133.31	-8102.28	-31.6312	0.601131
frame_0516_x0.23_y0.77_z1.5_angle120.0_tilt60.0_tazi270.0	0.23	0.77	1.5	120	60	270	-8133.31	-8102.28	-31.6312	0.601131
frame_0504_x0.23_y0.77_z1.5_angle60.0_tilt60.0_tazi270.0	0.23	0.77	1.5	60	60	270	-8133.31	-8102.28	-31.6312	0.601131
frame_0528_x0.23_y0.77_z1.5_angle180.0_tilt60.0_tazi270.0	0.23	0.77	1.5	180	60	270	-8133.31	-8102.28	-31.6312	0.601132
frame_1380_x0.77_y0.77_z1.5_angle120.0_tilt60.0_tazi270.0	0.77	0.77	1.5	120	60	270	-8133.31	-8102.28	-31.6312	0.601132
frame_1392_x0.77_y0.77_z1.5_angle180.0_tilt60.0_tazi270.0	0.77	0.77	1.5	180	60	270	-8133.31	-8102.28	-31.6312	0.601132
frame_1368_x0.77_y0.77_z1.5_angle60.0_tilt60.0_tazi270.0	0.77	0.77	1.5	60	60	270	-8133.31	-8102.28	-31.6312	0.601132
frame_1356_x0.77_y0.77_z1.5_angle0.0_tilt60.0_tazi270.0	0.77	0.77	1.5	0	60	270	-8133.31	-8102.28	-31.6312	0.601132
frame_1572_x0.95_y0.41_z1.5_angle120.0_tilt60.0_tazi270.0	0.95	0.41	1.5	120	60	270	-8133.28	-8102.28	-31.6312	0.627783
frame_0108_x0.05_y0.41_z1.5_angle0.0_tilt60.0_tazi270.0	0.05	0.41	1.5	0	60	270	-8133.28	-8102.28	-31.6312	0.627784
frame_0144_x0.05_y0.41_z1.5_angle180.0_tilt60.0_tazi270.0	0.05	0.41	1.5	180	60	270	-8133.28	-8102.28	-31.6312	0.627784
frame_1560_x0.95_y0.41_z1.5_angle60.0_tilt60.0_tazi270.0	0.95	0.41	1.5	60	60	270	-8133.28	-8102.28	-31.6312	0.627786
frame_1584_x0.95_y0.41_z1.5_angle180.0_tilt60.0_tazi270.0	0.95	0.41	1.5	180	60	270	-8133.28	-8102.28	-31.6312	0.627787
frame_1548_x0.95_y0.41_z1.5_angle0.0_tilt60.0_tazi270.0	0.95	0.41	1.5	0	60	270	-8133.28	-8102.28	-31.6312	0.627789
frame_0120_x0.05_y0.41_z1.5_angle60.0_tilt60.0_tazi270.0	0.05	0.41	1.5	60	60	270	-8133.28	-8102.28	-31.6312	0.627789
frame_0132_x0.05_y0.41_z1.5_angle120.0_tilt60.0_tazi270.0	0.05	0.41	1.5	120	60	270	-8133.28	-8102.28	-31.6312	0.62779
frame_0941_x0.59_y0.23_z1.5_angle120.0_tilt30.0_tazi0.0	0.59	0.23	1.5	120	30	0	-8133.28	-8102.28	-31.6312	0.628932
frame_0631_x0.41_y0.23_z1.5_angle0.0_tilt30.0_tazi180.0	0.41	0.23	1.5	0	30	180	-8133.28	-8102.28	-31.6312	0.628933
frame_0929_x0.59_y0.23_z1.5_angle60.0_tilt30.0_tazi0.0	0.59	0.23	1.5	60	30	0	-8133.28	-8102.28	-31.6312	0.628933
frame_0643_x0.41_y0.23_z1.5_angle60.0_tilt30.0_tazi180.0	0.41	0.23	1.5	60	30	180	-8133.28	-8102.28	-31.6312	0.628933
frame_0655_x0.41_y0.23_z1.5_angle120.0_tilt30.0_tazi180.0	0.41	0.23	1.5	120	30	180	-8133.28	-8102.28	-31.6312	0.628934
frame_0917_x0.59_y0.23_z1.5_angle0.0_tilt30.0_tazi0.0	0.59	0.23	1.5	0	30	0	-8133.28	-8102.28	-31.6312	0.628934
frame_0953_x0.59_y0.23_z1.5_angle180.0_tilt30.0_tazi0.0	0.59	0.23	1.5	180	30	0	-8133.28	-8102.28	-31.6312	0.628935
frame_0667_x0.41_y0.23_z1.5_angle180.0_tilt30.0_tazi180.0	0.41	0.23	1.5	180	30	180	-8133.28	-8102.28	-31.6312	0.628936
frame_1477_x0.95_y0.05_z1.5_angle180.0_tilt0.0_tazi0.0	0.95	0.05	1.5	180	0	0	-8133.28	-8102.28	-31.6312	0.63402
frame_1466_x0.95_y0.05_z1.5_angle120.0_tilt0.0_tazi90.0	0.95	0.05	1.5	120	0	90	-8133.28	-8102.28	-31.6312	0.63402
frame_1479_x0.95_y0.05_z1.5_angle180.0_tilt0.0_tazi180.0	0.95	0.05	1.5	180	0	180	-8133.28	-8102.28	-31.6312	0.63402
frame_1444_x0.95_y0.05_z1.5_angle0.0_tilt0.0_tazi270.0	0.95	0.05	1.5	0	0	270	-8133.28	-8102.28	-31.6312	0.634021
frame_0025_x0.05_y0.05_z1.5_angle120.0_tilt0.0_tazi0.0	0.05	0.05	1.5	120	0	0	-8133.28	-8102.28	-31.6312	0.634021
frame_0004_x0.05_y0.05_z1.5_angle0.0_tilt0.0_tazi270.0	0.05	0.05	1.5	0	0	270	-8133.28	-8102.28	-31.6312	0.634021
frame_0039_x0.05_y0.05_z1.5_angle180.0_tilt0.0_tazi180.0	0.05	0.05	1.5	180	0	180	-8133.28	-8102.28	-31.6312	0.634022
frame_1467_x0.95_y0.05_z1.5_angle120.0_tilt0.0_tazi180.0	0.95	0.05	1.5	120	0	180	-8133.28	-8102.28	-31.6312	0.634022
frame_0001_x0.05_y0.05_z1.5_angle0.0_tilt0.0_tazi0.0	0.05	0.05	1.5	0	0	0	-8133.28	-8102.28	-31.6312	0.634022
frame_1465_x0.95_y0.05_z1.5_angle120.0_tilt0.0_tazi0.0	0.95	0.05	1.5	120	0	0	-8133.28	-8102.28	-31.6312	0.634022
frame_0014_x0.05_y0.05_z1.5_angle60.0_tilt0.0_tazi90.0	0.05	0.05	1.5	60	0	90	-8133.28	-8102.28	-31.6312	0.634022
frame_1455_x0.95_y0.05_z1.5_angle60.0_tilt0.0_tazi180.0	0.95	0.05	1.5	60	0	180	-8133.28	-8102.28	-31.6312	0.634022
frame_1468_x0.95_y0.05_z1.5_angle120.0_tilt0.0_tazi270.0	0.95	0.05	1.5	120	0	270	-8133.28	-8102.28	-31.6312	0.634023
frame_0026_x0.05_y0.05_z1.5_angle120.0_tilt0.0_tazi90.0	0.05	0.05	1.5	120	0	90	-8133.28	-8102.28	-31.6312	0.634023
frame_0003_x0.05_y0.05_z1.5_angle0.0_tilt0.0_tazi180.0	0.05	0.05	1.5	0	0	180	-8133.28	-8102.28	-31.6312	0.634025
frame_0037_x0.05_y0.05_z1.5_angle180.0_tilt0.0_tazi0.0	0.05	0.05	1.5	180	0	0	-8133.28	-8102.28	-31.6312	0.634025
frame_1478_x0.95_y0.05_z1.5_angle180.0_tilt0.0_tazi90.0	0.95	0.05	1.5	180	0	90	-8133.28	-8102.28	-31.6312	0.634025
frame_0028_x0.05_y0.05_z1.5_angle120.0_tilt0.0_tazi270.0	0.05	0.05	1.5	120	0	270	-8133.28	-8102.28	-31.6312	0.634025
frame_1453_x0.95_y0.05_z1.5_angle60.0_tilt0.0_tazi0.0	0.95	0.05	1.5	60	0	0	-8133.28	-8102.28	-31.6312	0.634026
frame_1443_x0.95_y0.05_z1.5_angle0.0_tilt0.0_tazi180.0	0.95	0.05	1.5	0	0	180	-8133.28	-8102.28	-31.6312	0.634026
frame_1454_x0.95_y0.05_z1.5_angle60.0_tilt0.0_tazi90.0	0.95	0.05	1.5	60	0	90	-8133.28	-8102.28	-31.6312	0.634026
frame_0015_x0.05_y0.05_z1.5_angle60.0_tilt0.0_tazi180.0	0.05	0.05	1.5	60	0	180	-8133.28	-8102.28	-31.6312	0.634027
frame_1456_x0.95_y0.05_z1.5_angle60.0_tilt0.0_tazi270.0	0.95	0.05	1.5	60	0	270	-8133.28	-8102.28	-31.6312	0.634027
frame_0038_x0.05_y0.05_z1.5_angle180.0_tilt0.0_tazi90.0	0.05	0.05	1.5	180	0	90	-8133.28	-8102.28	-31.6312	0.634027
frame_1442_x0.95_y0.05_z1.5_angle0.0_tilt0.0_tazi90.0	0.95	0.05	1.5	0	0	90	-8133.28	-8102.28	-31.6312	0.634027
frame_1480_x0.95_y0.05_z1.5_angle180.0_tilt0.0_tazi270.0	0.95	0.05	1.5	180	0	270	-8133.28	-8102.28	-31.6312	0.634027
frame_0016_x0.05_y0.05_z1.5_angle60.0_tilt0.0_tazi270.0	0.05	0.05	1.5	60	0	270	-8133.28	-8102.28	-31.6312	0.634028
frame_0002_x0.05_y0.05_z1.5_angle0.0_tilt0.0_tazi90.0	0.05	0.05	1.5	0	0	90	-8133.28	-8102.28	-31.6312	0.634028
frame_1441_x0.95_y0.05_z1.5_angle0.0_tilt0.0_tazi0.0	0.95	0.05	1.5	0	0	0	-8133.28	-8102.28	-31.6312	0.634028
frame_0040_x0.05_y0.05_z1.5_angle180.0_tilt0.0_tazi270.0	0.05	0.05	1.5	180	0	270	-8133.28	-8102.28	-31.6312	0.634029
frame_0013_x0.05_y0.05_z1.5_angle60.0_tilt0.0_tazi0.0	0.05	0.05	1.5	60	0	0	-8133.28	-8102.28	-31.6312	0.634029
frame_0027_x0.05_y0.05_z1.5_angle120.0_tilt0.0_tazi180.0	0.05	0.05	1.5	120	0	180	-8133.28	-8102.28	-31.6312	0.63403
frame_1055_x0.59_y0.59_z1.5_angle180.0_tilt60.0_tazi180.0	0.59	0.59	1.5	180	60	180	-8133.26	-8102.28	-31.6312	0.648883
frame_0729_x0.41_y0.59_z1.5_angle0.0_tilt60.0_tazi0.0	0.41	0.59	1.5	0	60	0	-8133.26	-8102.28	-31.6312	0.648884
frame_0765_x0.41_y0.59_z1.5_angle180.0_tilt60.0_tazi0.0	0.41	0.59	1.5	180	60	0	-8133.26	-8102.28	-31.6312	0.648884
frame_1043_x0.59_y0.59_z1.5_angle120.0_tilt60.0_tazi180.0	0.59	0.59	1.5	120	60	180	-8133.26	-8102.28	-31.6312	0.648888
frame_1031_x0.59_y0.59_z1.5_angle60.0_tilt60.0_tazi180.0	0.59	0.59	1.5	60	60	180	-8133.26	-8102.28	-31.6312	0.648888
frame_1019_x0.59_y0.59_z1.5_angle0.0_tilt60.0_tazi180.0	0.59	0.59	1.5	0	60	180	-8133.26	-8102.28	-31.6312	0.648888
frame_0753_x0.41_y0.59_z1.5_angle120.0_tilt60.0_tazi0.0	0.41	0.59	1.5	120	60	0	-8133.26	-8102.28	-31.6312	0.648889
frame_0741_x0.41_y0.59_z1.5_angle60.0_tilt60.0_tazi0.0	0.41	0.59	1.5	60	60	0	-8133.26	-8102.28	-31.6312	0.64889
frame_0755_x0.41_y0.59_z1.5_angle120.0_tilt60.0_tazi180.0	0.41	0.59	1.5	120	60	180	-8133.23	-8102.28	-31.6312	0.678625
frame_0731_x0.41_y0.59_z1.5_angle0.0_tilt60.0_tazi180.0	0.41	0.59	1.5	0	60	180	-8133.23	-8102.28	-31.6312	0.678626
frame_1041_x0.59_y0.59_z1.5_angle120.0_tilt60.0_tazi0.0	0.59	0.59	1.5	120	60	0	-8133.23	-8102.28	-31.6312	0.678629
frame_0743_x0.41_y0.59_z1.5_angle60.0_tilt60.0_tazi180.0	0.41	0.59	1.5	60	60	180	-8133.23	-8102.28	-31.6312	0.67863
frame_1017_x0.59_y0.59_z1.5_angle0.0_tilt60.0_tazi0.0	0.59	0.59	1.5	0	60	0	-8133.23	-8102.28	-31.6312	0.67863
frame_1029_x0.59_y0.59_z1.5_angle60.0_tilt60.0_tazi0.0	0.59	0.59	1.5	60	60	0	-8133.23	-8102.28	-31.6312	0.678631
frame_1053_x0.59_y0.59_z1.5_angle180.0_tilt60.0_tazi0.0	0.59	0.59	1.5	180	60	0	-8133.23	-8102.28	-31.6312	0.678632
frame_0767_x0.41_y0.59_z1.5_angle180.0_tilt60.0_tazi180.0	0.41	0.59	1.5	180	60	180	-8133.23	-8102.28	-31.6312	0.678634
frame_0937_x0.59_y0.23_z1.5_angle120.0_tilt0.0_tazi0.0	0.59	0.23	1.5	120	0	0	-8133.22	-8102.28	-31.6312	0.685141
frame_0938_x0.59_y0.23_z1.5_angle120.0_tilt0.0_tazi90.0	0.59	0.23	1.5	120	0	90	-8133.22	-8102.28	-31.6312	0.685141
frame_0652_x0.41_y0.23_z1.5_angle120.0_tilt0.0_tazi270.0	0.41	0.23	1.5	120	0	270	-8133.22	-8102.28	-31.6312	0.685141
frame_0926_x0.59_y0.23_z1.5_angle60.0_tilt0.0_tazi90.0	0.59	0.23	1.5	60	0	90	-8133.22	-8102.28	-31.6312	0.685141
frame_0914_x0.59_y0.23_z1.5_angle0.0_tilt0.0_tazi90.0	0.59	0.23	1.5	0	0	90	-8133.22	-8102.28	-31.6312	0.685141
frame_0638_x0.41_y0.23_z1.5_angle60.0_tilt0.0_tazi90.0	0.41	0.23	1.5	60	0	90	-8133.22	-8102.28	-31.6312	0.685141
frame_0651_x0.41_y0.23_z1.5_angle120.0_tilt0.0_tazi180.0	0.41	0.23	1.5	120	0	180	-8133.22	-8102.28	-31.6312	0.685141
frame_0928_x0.59_y0.23_z1.5_angle60.0_tilt0.0_tazi270.0	0.59	0.23	1.5	60	0	270	-8133.22	-8102.28	-31.6312	0.685142
frame_0949_x0.59_y0.23_z1.5_angle180.0_tilt0.0_tazi0.0	0.59	0.23	1.5	180	0	0	-8133.22	-8102.28	-31.6312	0.685142
frame_0627_x0.41_y0.23_z1.5_angle0.0_tilt0.0_tazi180.0	0.41	0.23	1.5	0	0	180	-8133.22	-8102.28	-31.6312	0.685142
frame_0913_x0.59_y0.23_z1.5_angle0.0_tilt0.0_tazi0.0	0.59	0.23	1.5	0	0	0	-8133.22	-8102.28	-31.6312	0.685142
frame_0661_x0.41_y0.23_z1.5_angle180.0_tilt0.0_tazi0.0	0.41	0.23	1.5	180	0	0	-8133.22	-8102.28	-31.6312	0.685142
frame_0915_x0.59_y0.23_z1.5_angle0.0_tilt0.0_tazi180.0	0.59	0.23	1.5	0	0	180	-8133.22	-8102.28	-31.6312	0.685142
frame_0952_x0.59_y0.23_z1.5_angle180.0_tilt0.0_tazi270.0	0.59	0.23	1.5	180	0	270	-8133.22	-8102.28	-31.6312	0.685142
frame_0649_x0.41_y0.23_z1.5_angle120.0_tilt0.0_tazi0.0	0.41	0.23	1.5	120	0	0	-8133.22	-8102.28	-31.6312	0.685142
frame_0940_x0.59_y0.23_z1.5_angle120.0_tilt0.0_tazi270.0	0.59	0.23	1.5	120	0	270	-8133.22	-8102.28	-31.6312	0.685142
frame_0637_x0.41_y0.23_z1.5_angle60.0_tilt0.0_tazi0.0	0.41	0.23	1.5	60	0	0	-8133.22	-8102.28	-31.6312	0.685142
frame_0625_x0.41_y0.23_z1.5_angle0.0_tilt0.0_tazi0.0	0.41	0.23	1.5	0	0	0	-8133.22	-8102.28	-31.6312	0.685142
frame_0664_x0.41_y0.23_z1.5_angle180.0_tilt0.0_tazi270.0	0.41	0.23	1.5	180	0	270	-8133.22	-8102.28	-31.6312	0.685142
frame_0939_x0.59_y0.23_z1.5_angle120.0_tilt0.0_tazi180.0	0.59	0.23	1.5	120	0	180	-8133.22	-8102.28	-31.6312	0.685142
frame_0663_x0.41_y0.23_z1.5_angle180.0_tilt0.0_tazi180.0	0.41	0.23	1.5	180	0	180	-8133.22	-8102.28	-31.6312	0.685142
frame_0927_x0.59_y0.23_z1.5_angle60.0_tilt0.0_tazi180.0	0.59	0.23	1.5	60	0	180	-8133.22	-8102.28	-31.6312	0.685142
frame_0662_x0.41_y0.23_z1.5_angle180.0_tilt0.0_tazi90.0	0.41	0.23	1.5	180	0	90	-8133.22	-8102.28	-31.6312	0.685142
frame_0950_x0.59_y0.23_z1.5_angle180.0_tilt0.0_tazi90.0	0.59	0.23	1.5	180	0	90	-8133.22	-8102.28	-31.6312	0.685142
frame_0639_x0.41_y0.23_z1.5_angle60.0_tilt0.0_tazi180.0	0.41	0.23	1.5	60	0	180	-8133.22	-8102.28	-31.6312	0.685143
frame_0650_x0.41_y0.23_z1.5_angle120.0_tilt0.0_tazi90.0	0.41	0.23	1.5	120	0	90	-8133.22	-8102.28	-31.6312	0.685143
frame_0916_x0.59_y0.23_z1.5_angle0.0_tilt0.0_tazi270.0	0.59	0.23	1.5	0	0	270	-8133.22	-8102.28	-31.6312	0.685143
frame_0626_x0.41_y0.23_z1.5_angle0.0_tilt0.0_tazi90.0	0.41	0.23	1.5	0	0	90	-8133.22	-8102.28	-31.6312	0.685144
frame_0640_x0.41_y0.23_z1.5_angle60.0_tilt0.0_tazi270.0	0.41	0.23	1.5	60	0	270	-8133.22	-8102.28	-31.6312	0.685144
frame_0951_x0.59_y0.23_z1.5_angle180.0_tilt0.0_tazi180.0	0.59	0.23	1.5	180	0	180	-8133.22	-8102.28	-31.6312	0.685144
frame_0628_x0.41_y0.23_z1.5_angle0.0_tilt0.0_tazi270.0	0.41	0.23	1.5	0	0	270	-8133.22	-8102.28	-31.6312	0.685145
frame_0925_x0.59_y0.23_z1.5_angle60.0_tilt0.0_tazi0.0	0.59	0.23	1.5	60	0	0	-8133.22	-8102.28	-31.6312	0.685145
frame_0404_x0.23_y0.41_z1.5_angle60.0_tilt30.0_tazi270.0	0.23	0.41	1.5	60	30	270	-8133.21	-8102.28	-31.6312	0.700717
frame_1280_x0.77_y0.41_z1.5_angle120.0_tilt30.0_tazi270.0	0.77	0.41	1.5	120	30	270	-8133.21	-8102.28	-31.6312	0.700718
frame_1268_x0.77_y0.41_z1.5_angle60.0_tilt30.0_tazi270.0	0.77	0.41	1.5	60	30	270	-8133.21	-8102.28	-31.6312	0.700718
frame_0428_x0.23_y0.41_z1.5_angle180.0_tilt30.0_tazi270.0	0.23	0.41	1.5	180	30	270	-8133.21	-8102.28	-31.6312	0.700719
frame_1256_x0.77_y0.41_z1.5_angle0.0_tilt30.0_tazi270.0	0.77	0.41	1.5	0	30	270	-8133.21	-8102.28	-31.6312	0.700719
frame_0416_x0.23_y0.41_z1.5_angle120.0_tilt30.0_tazi270.0	0.23	0.41	1.5	120	30	270	-8133.21	-8102.28	-31.6312	0.700719
frame_0392_x0.23_y0.41_z1.5_angle0.0_tilt30.0_tazi270.0	0.23	0.41	1.5	0	30	270	-8133.21	-8102.28	-31.6312	0.70072
frame_1292_x0.77_y0.41_z1.5_angle180.0_tilt30.0_tazi270.0	0.77	0.41	1.5	180	30	270	-8133.21	-8102.28	-31.6312	0.700721
frame_1051_x0.59_y0.59_z1.5_angle180.0_tilt30.0_tazi180.0	0.59	0.59	1.5	180	30	180	-8133.2	-8102.28	-31.6312	0.709371
frame_0749_x0.41_y0.59_z1.5_angle120.0_tilt30.0_tazi0.0	0.41	0.59	1.5	120	30	0	-8133.2	-8102.28	-31.6312	0.709371
frame_1015_x0.59_y0.59_z1.5_angle0.0_tilt30.0_tazi180.0	0.59	0.59	1.5	0	30	180	-8133.2	-8102.28	-31.6312	0.709372
frame_0737_x0.41_y0.59_z1.5_angle60.0_tilt30.0_tazi0.0	0.41	0.59	1.5	60	30	0	-8133.2	-8102.28	-31.6312	0.709372
frame_1039_x0.59_y0.59_z1.5_angle120.0_tilt30.0_tazi180.0	0.59	0.59	1.5	120	30	180	-8133.2	-8102.28	-31.6312	0.709372
frame_0725_x0.41_y0.59_z1.5_angle0.0_tilt30.0_tazi0.0	0.41	0.59	1.5	0	30	0	-8133.2	-8102.28	-31.6312	0.709372
frame_0761_x0.41_y0.59_z1.5_angle180.0_tilt30.0_tazi0.0	0.41	0.59	1.5	180	30	0	-8133.2	-8102.28	-31.6312	0.709373
frame_1027_x0.59_y0.59_z1.5_angle60.0_tilt30.0_tazi180.0	0.59	0.59	1.5	60	30	180	-8133.2	-8102.28	-31.6312	0.709374
frame_0764_x0.41_y0.59_z1.5_angle180.0_tilt30.0_tazi270.0	0.41	0.59	1.5	180	30	270	-8133.19	-8102.28	-31.6312	0.722137
frame_0728_x0.41_y0.59_z1.5_angle0.0_tilt30.0_tazi270.0	0.41	0.59	1.5	0	30	270	-8133.19	-8102.28	-31.6312	0.722137
frame_0752_x0.41_y0.59_z1.5_angle120.0_tilt30.0_tazi270.0	0.41	0.59	1.5	120	30	270	-8133.19	-8102.28	-31.6312	0.722137
frame_1028_x0.59_y0.59_z1.5_angle60.0_tilt30.0_tazi270.0	0.59	0.59	1.5	60	30	270	-8133.19	-8102.28	-31.6312	0.722137
frame_1052_x0.59_y0.59_z1.5_angle180.0_tilt30.0_tazi270.0	0.59	0.59	1.5	180	30	270	-8133.19	-8102.28	-31.6312	0.722137
frame_1016_x0.59_y0.59_z1.5_angle0.0_tilt30.0_tazi270.0	0.59	0.59	1.5	0	30	270	-8133.19	-8102.28	-31.6312	0.722138
frame_1040_x0.59_y0.59_z1.5_angle120.0_tilt30.0_tazi270.0	0.59	0.59	1.5	120	30	270	-8133.19	-8102.28	-31.6312	0.72214
frame_0740_x0.41_y0.59_z1.5_angle60.0_tilt30.0_tazi270.0	0.41	0.59	1.5	60	30	270	-8133.19	-8102.28	-31.6312	0.72214
frame_1032_x0.59_y0.59_z1.5_angle60.0_tilt60.0_tazi270.0	0.59	0.59	1.5	60	60	270	-8133.18	-8102.28	-31.6312	0.734379
frame_1056_x0.59_y0.59_z1.5_angle180.0_tilt60.0_tazi270.0	0.59	0.59	1.5	180	60	270	-8133.18	-8102.28	-31.6312	0.73438
frame_0756_x0.41_y0.59_z1.5_angle120.0_tilt60.0_tazi270.0	0.41	0.59	1.5	120	60	270	-8133.18	-8102.28	-31.6312	0.73438
frame_1020_x0.59_y0.59_z1.5_angle0.0_tilt60.0_tazi270.0	0.59	0.59	1.5	0	60	270	-8133.18	-8102.28	-31.6312	0.734381
frame_0732_x0.41_y0.59_z1.5_angle0.0_tilt60.0_tazi270.0	0.41	0.59	1.5	0	60	270	-8133.18	-8102.28	-31.6312	0.734381
frame_0744_x0.41_y0.59_z1.5_angle60.0_tilt60.0_tazi270.0	0.41	0.59	1.5	60	60	270	-8133.18	-8102.28	-31.6312	0.734382
frame_1044_x0.59_y0.59_z1.5_angle120.0_tilt60.0_tazi270.0	0.59	0.59	1.5	120	60	270	-8133.18	-8102.28	-31.6312	0.734382
frame_0768_x0.41_y0.59_z1.5_angle180.0_tilt60.0_tazi270.0	0.41	0.59	1.5	180	60	270	-8133.18	-8102.28	-31.6312	0.734382
frame_1013_x0.59_y0.59_z1.5_angle0.0_tilt30.0_tazi0.0	0.59	0.59	1.5	0	30	0	-8133.17	-8102.28	-31.6312	0.738784
frame_1025_x0.59_y0.59_z1.5_angle60.0_tilt30.0_tazi0.0	0.59	0.59	1.5	60	30	0	-8133.17	-8102.28	-31.6312	0.738785
frame_0739_x0.41_y0.59_z1.5_angle60.0_tilt30.0_tazi180.0	0.41	0.59	1.5	60	30	180	-8133.17	-8102.28	-31.6312	0.738785
frame_0727_x0.41_y0.59_z1.5_angle0.0_tilt30.0_tazi180.0	0.41	0.59	1.5	0	30	180	-8133.17	-8102.28	-31.6312	0.738785
frame_0751_x0.41_y0.59_z1.5_angle120.0_tilt30.0_tazi180.0	0.41	0.59	1.5	120	30	180	-8133.17	-8102.28	-31.6312	0.738785
frame_0763_x0.41_y0.59_z1.5_angle180.0_tilt30.0_tazi180.0	0.41	0.59	1.5	180	30	180	-8133.17	-8102.28	-31.6312	0.738785
frame_1049_x0.59_y0.59_z1.5_angle180.0_tilt30.0_tazi0.0	0.59	0.59	1.5	180	30	0	-8133.17	-8102.28	-31.6312	0.738786
frame_1037_x0.59_y0.59_z1.5_angle120.0_tilt30.0_tazi0.0	0.59	0.59	1.5	120	30	0	-8133.17	-8102.28	-31.6312	0.738786
frame_0520_x0.23_y0.77_z1.5_angle180.0_tilt0.0_tazi270.0	0.23	0.77	1.5	180	0	270	-8133.17	-8102.28	-31.6312	0.742403
frame_1384_x0.77_y0.77_z1.5_angle180.0_tilt0.0_tazi270.0	0.77	0.77	1.5	180	0	270	-8133.17	-8102.28	-31.6312	0.742404
frame_0508_x0.23_y0.77_z1.5_angle120.0_tilt0.0_tazi270.0	0.23	0.77	1.5	120	0	270	-8133.17	-8102.28	-31.6312	0.742404
frame_1358_x0.77_y0.77_z1.5_angle60.0_tilt0.0_tazi90.0	0.77	0.77	1.5	60	0	90	-8133.17	-8102.28	-31.6312	0.742404
frame_1347_x0.77_y0.77_z1.5_angle0.0_tilt0.0_tazi180.0	0.77	0.77	1.5	0	0	180	-8133.17	-8102.28	-31.6312	0.742404
frame_0481_x0.23_y0.77_z1.5_angle0.0_tilt0.0_tazi0.0	0.23	0.77	1.5	0	0	0	-8133.17	-8102.28	-31.6312	0.742404
frame_1371_x0.77_y0.77_z1.5_angle120.0_tilt0.0_tazi180.0	0.77	0.77	1.5	120	0	180	-8133.17	-8102.28	-31.6312	0.742404
frame_0493_x0.23_y0.77_z1.5_angle60.0_tilt0.0_tazi0.0	0.23	0.77	1.5	60	0	0	-8133.17	-8102.28	-31.6312	0.742404
frame_0519_x0.23_y0.77_z1.5_angle180.0_tilt0.0_tazi180.0	0.23	0.77	1.5	180	0	180	-8133.17	-8102.28	-31.6312	0.742404
frame_1383_x0.77_y0.77_z1.5_angle180.0_tilt0.0_tazi180.0	0.77	0.77	1.5	180	0	180	-8133.17	-8102.28	-31.6312	0.742405
frame_1359_x0.77_y0.77_z1.5_angle60.0_tilt0.0_tazi180.0	0.77	0.77	1.5	60	0	180	-8133.17	-8102.28	-31.6312	0.742405
frame_1370_x0.77_y0.77_z1.5_angle120.0_tilt0.0_tazi90.0	0.77	0.77	1.5	120	0	90	-8133.17	-8102.28	-31.6312	0.742405
frame_1372_x0.77_y0.77_z1.5_angle120.0_tilt0.0_tazi270.0	0.77	0.77	1.5	120	0	270	-8133.17	-8102.28	-31.6312	0.742405
frame_0496_x0.23_y0.77_z1.5_angle60.0_tilt0.0_tazi270.0	0.23	0.77	1.5	60	0	270	-8133.17	-8102.28	-31.6312	0.742405
frame_0495_x0.23_y0.77_z1.5_angle60.0_tilt0.0_tazi180.0	0.23	0.77	1.5	60	0	180	-8133.17	-8102.28	-31.6312	0.742405
frame_0505_x0.23_y0.77_z1.5_angle120.0_tilt0.0_tazi0.0	0.23	0.77	1.5	120	0	0	-8133.17	-8102.28	-31.6312	0.742405
frame_1346_x0.77_y0.77_z1.5_angle0.0_tilt0.0_tazi90.0	0.77	0.77	1.5	0	0	90	-8133.17	-8102.28	-31.6312	0.742405
frame_1357_x0.77_y0.77_z1.5_angle60.0_tilt0.0_tazi0.0	0.77	0.77	1.5	60	0	0	-8133.17	-8102.28	-31.6312	0.742405
frame_0494_x0.23_y0.77_z1.5_angle60.0_tilt0.0_tazi90.0	0.23	0.77	1.5	60	0	90	-8133.17	-8102.28	-31.6312	0.742405
frame_1345_x0.77_y0.77_z1.5_angle0.0_tilt0.0_tazi0.0	0.77	0.77	1.5	0	0	0	-8133.17	-8102.28	-31.6312	0.742405
frame_0482_x0.23_y0.77_z1.5_angle0.0_tilt0.0_tazi90.0	0.23	0.77	1.5	0	0	90	-8133.17	-8102.28	-31.6312	0.742405
frame_0507_x0.23_y0.77_z1.5_angle120.0_tilt0.0_tazi180.0	0.23	0.77	1.5	120	0	180	-8133.17	-8102.28	-31.6312	0.742405
frame_0518_x0.23_y0.77_z1.5_angle180.0_tilt0.0_tazi90.0	0.23	0.77	1.5	180	0	90	-8133.17	-8102.28	-31.6312	0.742405
frame_1382_x0.77_y0.77_z1.5_angle180.0_tilt0.0_tazi90.0	0.77	0.77	1.5	180	0	90	-8133.17	-8102.28	-31.6312	0.742405
frame_0517_x0.23_y0.77_z1.5_angle180.0_tilt0.0_tazi0.0	0.23	0.77	1.5	180	0	0	-8133.17	-8102.28	-31.6312	0.742406
frame_1348_x0.77_y0.77_z1.5_angle0.0_tilt0.0_tazi270.0	0.77	0.77	1.5	0	0	270	-8133.17	-8102.28	-31.6312	0.742406
frame_1360_x0.77_y0.77_z1.5_angle60.0_tilt0.0_tazi270.0	0.77	0.77	1.5	60	0	270	-8133.17	-8102.28	-31.6312	0.742406
frame_0506_x0.23_y0.77_z1.5_angle120.0_tilt0.0_tazi90.0	0.23	0.77	1.5	120	0	90	-8133.17	-8102.28	-31.6312	0.742406
frame_0483_x0.23_y0.77_z1.5_angle0.0_tilt0.0_tazi180.0	0.23	0.77	1.5	0	0	180	-8133.17	-8102.28	-31.6312	0.742406
frame_1381_x0.77_y0.77_z1.5_angle180.0_tilt0.0_tazi0.0	0.77	0.77	1.5	180	0	0	-8133.17	-8102.28	-31.6312	0.742408
frame_1369_x0.77_y0.77_z1.5_angle120.0_tilt0.0_tazi0.0	0.77	0.77	1.5	120	0	0	-8133.17	-8102.28	-31.6312	0.742408
frame_0484_x0.23_y0.77_z1.5_angle0.0_tilt0.0_tazi270.0	0.23	0.77	1.5	0	0	270	-8133.17	-8102.28	-31.6312	0.742409
frame_1568_x0.95_y0.41_z1.5_angle120.0_tilt30.0_tazi270.0	0.95	0.41	1.5	120	30	270	-8133.16	-8102.28	-31.6312	0.749531
frame_0128_x0.05_y0.41_z1.5_angle120.0_tilt30.0_tazi270.0	0.05	0.41	1.5	120	30	270	-8133.16	-8102.28	-31.6312	0.749532
frame_1556_x0.95_y0.41_z1.5_angle60.0_tilt30.0_tazi270.0	0.95	0.41	1.5	60	30	270	-8133.16	-8102.28	-31.6312	0.749532
frame_0116_x0.05_y0.41_z1.5_angle60.0_tilt30.0_tazi270.0	0.05	0.41	1.5	60	30	270	-8133.16	-8102.28	-31.6312	0.749532
frame_0140_x0.05_y0.41_z1.5_angle180.0_tilt30.0_tazi270.0	0.05	0.41	1.5	180	30	270	-8133.16	-8102.28	-31.6312	0.749532
frame_0104_x0.05_y0.41_z1.5_angle0.0_tilt30.0_tazi270.0	0.05	0.41	1.5	0	30	270	-8133.16	-8102.28	-31.6312	0.749533
frame_1580_x0.95_y0.41_z1.5_angle180.0_tilt30.0_tazi270.0	0.95	0.41	1.5	180	30	270	-8133.16	-8102.28	-31.6312	0.749533
frame_1544_x0.95_y0.41_z1.5_angle0.0_tilt30.0_tazi270.0	0.95	0.41	1.5	0	30	270	-8133.16	-8102.28	-31.6312	0.749534
frame_0736_x0.41_y0.59_z1.5_angle60.0_tilt0.0_tazi270.0	0.41	0.59	1.5	60	0	270	-8133.16	-8102.28	-31.6312	0.751645
frame_0721_x0.41_y0.59_z1.5_angle0.0_tilt0.0_tazi0.0	0.41	0.59	1.5	0	0	0	-8133.16	-8102.28	-31.6312	0.751645
frame_1010_x0.59_y0.59_z1.5_angle0.0_tilt0.0_tazi90.0	0.59	0.59	1.5	0	0	90	-8133.16	-8102.28	-31.6312	0.751645
frame_0746_x0.41_y0.59_z1.5_angle120.0_tilt0.0_tazi90.0	0.41	0.59	1.5	120	0	90	-8133.16	-8102.28	-31.6312	0.751645
frame_1047_x0.59_y0.59_z1.5_angle180.0_tilt0.0_tazi180.0	0.59	0.59	1.5	180	0	180	-8133.16	-8102.28	-31.6312	0.751645
frame_0722_x0.41_y0.59_z1.5_angle0.0_tilt0.0_tazi90.0	0.41	0.59	1.5	0	0	90	-8133.16	-8102.28	-31.6312	0.751645
frame_1045_x0.59_y0.59_z1.5_angle180.0_tilt0.0_tazi0.0	0.59	0.59	1.5	180	0	0	-8133.16	-8102.28	-31.6312	0.751645
frame_0758_x0.41_y0.59_z1.5_angle180.0_tilt0.0_tazi90.0	0.41	0.59	1.5	180	0	90	-8133.16	-8102.28	-31.6312	0.751646
frame_1046_x0.59_y0.59_z1.5_angle180.0_tilt0.0_tazi90.0	0.59	0.59	1.5	180	0	90	-8133.16	-8102.28	-31.6312	0.751646
frame_0748_x0.41_y0.59_z1.5_angle120.0_tilt0.0_tazi270.0	0.41	0.59	1.5	120	0	270	-8133.16	-8102.28	-31.6312	0.751646
frame_1036_x0.59_y0.59_z1.5_angle120.0_tilt0.0_tazi270.0	0.59	0.59	1.5	120	0	270	-8133.16	-8102.28	-31.6312	0.751646
frame_1011_x0.59_y0.59_z1.5_angle0.0_tilt0.0_tazi180.0	0.59	0.59	1.5	0	0	180	-8133.16	-8102.28	-31.6312	0.751646
frame_1009_x0.59_y0.59_z1.5_angle0.0_tilt0.0_tazi0.0	0.59	0.59	1.5	0	0	0	-8133.16	-8102.28	-31.6312	0.751646
frame_1048_x0.59_y0.59_z1.5_angle180.0_tilt0.0_tazi270.0	0.59	0.59	1.5	180	0	270	-8133.16	-8102.28	-31.6312	0.751646
frame_1035_x0.59_y0.59_z1.5_angle120.0_tilt0.0_tazi180.0	0.59	0.59	1.5	120	0	180	-8133.16	-8102.28	-31.6312	0.751646
frame_1023_x0.59_y0.59_z1.5_angle60.0_tilt0.0_tazi180.0	0.59	0.59	1.5	60	0	180	-8133.16	-8102.28	-31.6312	0.751646
frame_0747_x0.41_y0.59_z1.5_angle120.0_tilt0.0_tazi180.0	0.41	0.59	1.5	120	0	180	-8133.16	-8102.28	-31.6312	0.751647
frame_1012_x0.59_y0.59_z1.5_angle0.0_tilt0.0_tazi270.0	0.59	0.59	1.5	0	0	270	-8133.16	-8102.28	-31.6312	0.751647
frame_0723_x0.41_y0.59_z1.5_angle0.0_tilt0.0_tazi180.0	0.41	0.59	1.5	0	0	180	-8133.16	-8102.28	-31.6312	0.751647
frame_0724_x0.41_y0.59_z1.5_angle0.0_tilt0.0_tazi270.0	0.41	0.59	1.5	0	0	270	-8133.16	-8102.28	-31.6312	0.751647
frame_0757_x0.41_y0.59_z1.5_angle180.0_tilt0.0_tazi0.0	0.41	0.59	1.5	180	0	0	-8133.16	-8102.28	-31.6312	0.751648
frame_1034_x0.59_y0.59_z1.5_angle120.0_tilt0.0_tazi90.0	0.59	0.59	1.5	120	0	90	-8133.16	-8102.28	-31.6312	0.751648
frame_0733_x0.41_y0.59_z1.5_angle60.0_tilt0.0_tazi0.0	0.41	0.59	1.5	60	0	0	-8133.16	-8102.28	-31.6312	0.751648
frame_1022_x0.59_y0.59_z1.5_angle60.0_tilt0.0_tazi90.0	0.59	0.59	1.5	60	0	90	-8133.16	-8102.28	-31.6312	0.751649
frame_1033_x0.59_y0.59_z1.5_angle120.0_tilt0.0_tazi0.0	0.59	0.59	1.5	120	0	0	-8133.16	-8102.28	-31.6312	0.751649
frame_0745_x0.41_y0.59_z1.5_angle120.0_tilt0.0_tazi0.0	0.41	0.59	1.5	120	0	0	-8133.16	-8102.28	-31.6312	0.751649
frame_0760_x0.41_y0.59_z1.5_angle180.0_tilt0.0_tazi270.0	0.41	0.59	1.5	180	0	270	-8133.16	-8102.28	-31.6312	0.75165
frame_0734_x0.41_y0.59_z1.5_angle60.0_tilt0.0_tazi90.0	0.41	0.59	1.5	60	0	90	-8133.16	-8102.28	-31.6312	0.75165
frame_0759_x0.41_y0.59_z1.5_angle180.0_tilt0.0_tazi180.0	0.41	0.59	1.5	180	0	180	-8133.16	-8102.28	-31.6312	0.75165
frame_0735_x0.41_y0.59_z1.5_angle60.0_tilt0.0_tazi180.0	0.41	0.59	1.5	60	0	180	-8133.16	-8102.28	-31.6312	0.75165
frame_1021_x0.59_y0.59_z1.5_angle60.0_tilt0.0_tazi0.0	0.59	0.59	1.5	60	0	0	-8133.16	-8102.28	-31.6312	0.751651
frame_1024_x0.59_y0.59_z1.5_angle60.0_tilt0.0_tazi270.0	0.59	0.59	1.5	60	0	270	-8133.16	-8102.28	-31.6312	0.751651
frame_0762_x0.41_y0.59_z1.5_angle180.0_tilt30.0_tazi90.0	0.41	0.59	1.5	180	30	90	-8133.11	-8102.28	-31.6312	0.801893
frame_1050_x0.59_y0.59_z1.5_angle180.0_tilt30.0_tazi90.0	0.59	0.59	1.5	180	30	90	-8133.11	-8102.28	-31.6312	0.801893
frame_1014_x0.59_y0.59_z1.5_angle0.0_tilt30.0_tazi90.0	0.59	0.59	1.5	0	30	90	-8133.11	-8102.28	-31.6312	0.801893
frame_0726_x0.41_y0.59_z1.5_angle0.0_tilt30.0_tazi90.0	0.41	0.59	1.5	0	30	90	-8133.11	-8102.28	-31.6312	0.801894
frame_1026_x0.59_y0.59_z1.5_angle60.0_tilt30.0_tazi90.0	0.59	0.59	1.5	60	30	90	-8133.11	-8102.28	-31.6312	0.801894
frame_0750_x0.41_y0.59_z1.5_angle120.0_tilt30.0_tazi90.0	0.41	0.59	1.5	120	30	90	-8133.11	-8102.28	-31.6312	0.801894
frame_1038_x0.59_y0.59_z1.5_angle120.0_tilt30.0_tazi90.0	0.59	0.59	1.5	120	30	90	-8133.11	-8102.28	-31.6312	0.801895
frame_0738_x0.41_y0.59_z1.5_angle60.0_tilt30.0_tazi90.0	0.41	0.59	1.5	60	30	90	-8133.11	-8102.28	-31.6312	0.801896
frame_1054_x0.59_y0.59_z1.5_angle180.0_tilt60.0_tazi90.0	0.59	0.59	1.5	180	60	90	-8133.1	-8102.28	-31.6312	0.806404
frame_0766_x0.41_y0.59_z1.5_angle180.0_tilt60.0_tazi90.0	0.41	0.59	1.5	180	60	90	-8133.1	-8102.28	-31.6312	0.806404
frame_1042_x0.59_y0.59_z1.5_angle120.0_tilt60.0_tazi90.0	0.59	0.59	1.5	120	60	90	-8133.1	-8102.28	-31.6312	0.806404
frame_0742_x0.41_y0.59_z1.5_angle60.0_tilt60.0_tazi90.0	0.41	0.59	1.5	60	60	90	-8133.1	-8102.28	-31.6312	0.806404
frame_1030_x0.59_y0.59_z1.5_angle60.0_tilt60.0_tazi90.0	0.59	0.59	1.5	60	60	90	-8133.1	-8102.28	-31.6312	0.806404
frame_0730_x0.41_y0.59_z1.5_angle0.0_tilt60.0_tazi90.0	0.41	0.59	1.5	0	60	90	-8133.1	-8102.28	-31.6312	0.806405
frame_1018_x0.59_y0.59_z1.5_angle0.0_tilt60.0_tazi90.0	0.59	0.59	1.5	0	60	90	-8133.1	-8102.28	-31.6312	0.806405
frame_0754_x0.41_y0.59_z1.5_angle120.0_tilt60.0_tazi90.0	0.41	0.59	1.5	120	60	90	-8133.1	-8102.28	-31.6312	0.806405
frame_1458_x0.95_y0.05_z1.5_angle60.0_tilt30.0_tazi90.0	0.95	0.05	1.5	60	30	90	-8133.1	-8102.28	-31.6312	0.810026
frame_0030_x0.05_y0.05_z1.5_angle120.0_tilt30.0_tazi90.0	0.05	0.05	1.5	120	30	90	-8133.1	-8102.28	-31.6312	0.810026
frame_1482_x0.95_y0.05_z1.5_angle180.0_tilt30.0_tazi90.0	0.95	0.05	1.5	180	30	90	-8133.1	-8102.28	-31.6312	0.810026
frame_0006_x0.05_y0.05_z1.5_angle0.0_tilt30.0_tazi90.0	0.05	0.05	1.5	0	30	90	-8133.1	-8102.28	-31.6312	0.810026
frame_1470_x0.95_y0.05_z1.5_angle120.0_tilt30.0_tazi90.0	0.95	0.05	1.5	120	30	90	-8133.1	-8102.28	-31.6312	0.810026
frame_0042_x0.05_y0.05_z1.5_angle180.0_tilt30.0_tazi90.0	0.05	0.05	1.5	180	30	90	-8133.1	-8102.28	-31.6312	0.810026
frame_1446_x0.95_y0.05_z1.5_angle0.0_tilt30.0_tazi90.0	0.95	0.05	1.5	0	30	90	-8133.1	-8102.28	-31.6312	0.810026
frame_0018_x0.05_y0.05_z1.5_angle60.0_tilt30.0_tazi90.0	0.05	0.05	1.5	60	30	90	-8133.1	-8102.28	-31.6312	0.810027
frame_1547_x0.95_y0.41_z1.5_angle0.0_tilt60.0_tazi180.0	0.95	0.41	1.5	0	60	180	-8133.09	-8102.28	-31.6312	0.820366
frame_1571_x0.95_y0.41_z1.5_angle120.0_tilt60.0_tazi180.0	0.95	0.41	1.5	120	60	180	-8133.09	-8102.28	-31.6312	0.820367
frame_0117_x0.05_y0.41_z1.5_angle60.0_tilt60.0_tazi0.0	0.05	0.41	1.5	60	60	0	-8133.09	-8102.28	-31.6312	0.820367
frame_0105_x0.05_y0.41_z1.5_angle0.0_tilt60.0_tazi0.0	0.05	0.41	1.5	0	60	0	-8133.09	-8102.28	-31.6312	0.820367
frame_0141_x0.05_y0.41_z1.5_angle180.0_tilt60.0_tazi0.0	0.05	0.41	1.5	180	60	0	-8133.09	-8102.28	-31.6312	0.820367
frame_1559_x0.95_y0.41_z1.5_angle60.0_tilt60.0_tazi180.0	0.95	0.41	1.5	60	60	180	-8133.09	-8102.28	-31.6312	0.820368
frame_1583_x0.95_y0.41_z1.5_angle180.0_tilt60.0_tazi180.0	0.95	0.41	1.5	180	60	180	-8133.09	-8102.28	-31.6312	0.820368
frame_0129_x0.05_y0.41_z1.5_angle120.0_tilt60.0_tazi0.0	0.05	0.41	1.5	120	60	0	-8133.09	-8102.28	-31.6312	0.820369
frame_0125_x0.05_y0.41_z1.5_angle120.0_tilt30.0_tazi0.0	0.05	0.41	1.5	120	30	0	-8133.07	-8102.28	-31.6312	0.835211
frame_1543_x0.95_y0.41_z1.5_angle0.0_tilt30.0_tazi180.0	0.95	0.41	1.5	0	30	180	-8133.07	-8102.28	-31.6312	0.835212
frame_0113_x0.05_y0.41_z1.5_angle60.0_tilt30.0_tazi0.0	0.05	0.41	1.5	60	30	0	-8133.07	-8102.28	-31.6312	0.835212
frame_1579_x0.95_y0.41_z1.5_angle180.0_tilt30.0_tazi180.0	0.95	0.41	1.5	180	30	180	-8133.07	-8102.28	-31.6312	0.835213
frame_0137_x0.05_y0.41_z1.5_angle180.0_tilt30.0_tazi0.0	0.05	0.41	1.5	180	30	0	-8133.07	-8102.28	-31.6312	0.835213
frame_1567_x0.95_y0.41_z1.5_angle120.0_tilt30.0_tazi180.0	0.95	0.41	1.5	120	30	180	-8133.07	-8102.28	-31.6312	0.835214
frame_1555_x0.95_y0.41_z1.5_angle60.0_tilt30.0_tazi180.0	0.95	0.41	1.5	60	30	180	-8133.07	-8102.28	-31.6312	0.835217
frame_0101_x0.05_y0.41_z1.5_angle0.0_tilt30.0_tazi0.0	0.05	0.41	1.5	0	30	0	-8133.07	-8102.28	-31.6312	0.835218
frame_1161_x0.77_y0.05_z1.5_angle0.0_tilt60.0_tazi0.0	0.77	0.05	1.5	0	60	0	-8133.06	-8102.28	-31.6312	0.846529
frame_0311_x0.23_y0.05_z1.5_angle60.0_tilt60.0_tazi180.0	0.23	0.05	1.5	60	60	180	-8133.06	-8102.28	-31.6312	0.846529
frame_1185_x0.77_y0.05_z1.5_angle120.0_tilt60.0_tazi0.0	0.77	0.05	1.5	120	60	0	-8133.06	-8102.28	-31.6312	0.846529
frame_0323_x0.23_y0.05_z1.5_angle120.0_tilt60.0_tazi180.0	0.23	0.05	1.5	120	60	180	-8133.06	-8102.28	-31.6312	0.84653
frame_1197_x0.77_y0.05_z1.5_angle180.0_tilt60.0_tazi0.0	0.77	0.05	1.5	180	60	0	-8133.06	-8102.28	-31.6312	0.846532
frame_1173_x0.77_y0.05_z1.5_angle60.0_tilt60.0_tazi0.0	0.77	0.05	1.5	60	60	0	-8133.06	-8102.28	-31.6312	0.846534
frame_0335_x0.23_y0.05_z1.5_angle180.0_tilt60.0_tazi180.0	0.23	0.05	1.5	180	60	180	-8133.06	-8102.28	-31.6312	0.846535
frame_0299_x0.23_y0.05_z1.5_angle0.0_tilt60.0_tazi180.0	0.23	0.05	1.5	0	60	180	-8133.06	-8102.28	-31.6312	0.846537
frame_1462_x0.95_y0.05_z1.5_angle60.0_tilt60.0_tazi90.0	0.95	0.05	1.5	60	60	90	-8133.06	-8102.28	-31.6312	0.848246
frame_1450_x0.95_y0.05_z1.5_angle0.0_tilt60.0_tazi90.0	0.95	0.05	1.5	0	60	90	-8133.06	-8102.28	-31.6312	0.848247
frame_0046_x0.05_y0.05_z1.5_angle180.0_tilt60.0_tazi90.0	0.05	0.05	1.5	180	60	90	-8133.06	-8102.28	-31.6312	0.848247
frame_0022_x0.05_y0.05_z1.5_angle60.0_tilt60.0_tazi90.0	0.05	0.05	1.5	60	60	90	-8133.06	-8102.28	-31.6312	0.848247
frame_0034_x0.05_y0.05_z1.5_angle120.0_tilt60.0_tazi90.0	0.05	0.05	1.5	120	60	90	-8133.06	-8102.28	-31.6312	0.848248
frame_1486_x0.95_y0.05_z1.5_angle180.0_tilt60.0_tazi90.0	0.95	0.05	1.5	180	60	90	-8133.06	-8102.28	-31.6312	0.848249
frame_0010_x0.05_y0.05_z1.5_angle0.0_tilt60.0_tazi90.0	0.05	0.05	1.5	0	60	90	-8133.06	-8102.28	-31.6312	0.848249
frame_1474_x0.95_y0.05_z1.5_angle120.0_tilt60.0_tazi90.0	0.95	0.05	1.5	120	60	90	-8133.06	-8102.28	-31.6312	0.848249
frame_0321_x0.23_y0.05_z1.5_angle120.0_tilt60.0_tazi0.0	0.23	0.05	1.5	120	60	0	-8133.04	-8102.28	-31.6312	0.869121
frame_1199_x0.77_y0.05_z1.5_angle180.0_tilt60.0_tazi180.0	0.77	0.05	1.5	180	60	180	-8133.04	-8102.28	-31.6312	0.869124
frame_0333_x0.23_y0.05_z1.5_angle180.0_tilt60.0_tazi0.0	0.23	0.05	1.5	180	60	0	-8133.04	-8102.28	-31.6312	0.869124
frame_1163_x0.77_y0.05_z1.5_angle0.0_tilt60.0_tazi180.0	0.77	0.05	1.5	0	60	180	-8133.04	-8102.28	-31.6312	0.869124
frame_0309_x0.23_y0.05_z1.5_angle60.0_tilt60.0_tazi0.0	0.23	0.05	1.5	60	60	0	-8133.04	-8102.28	-31.6312	0.869125
frame_1187_x0.77_y0.05_z1.5_angle120.0_tilt60.0_tazi180.0	0.77	0.05	1.5	120	60	180	-8133.04	-8102.28	-31.6312	0.869126
frame_1175_x0.77_y0.05_z1.5_angle60.0_tilt60.0_tazi180.0	0.77	0.05	1.5	60	60	180	-8133.04	-8102.28	-31.6312	0.869126
frame_0297_x0.23_y0.05_z1.5_angle0.0_tilt60.0_tazi0.0	0.23	0.05	1.5	0	60	0	-8133.04	-8102.28	-31.6312	0.869127
frame_1200_x0.77_y0.05_z1.5_angle180.0_tilt60.0_tazi270.0	0.77	0.05	1.5	180	60	270	-8133.03	-8102.28	-31.6312	0.882612
frame_1164_x0.77_y0.05_z1.5_angle0.0_tilt60.0_tazi270.0	0.77	0.05	1.5	0	60	270	-8133.03	-8102.28	-31.6312	0.882613
frame_0312_x0.23_y0.05_z1.5_angle60.0_tilt60.0_tazi270.0	0.23	0.05	1.5	60	60	270	-8133.03	-8102.28	-31.6312	0.882614
frame_0300_x0.23_y0.05_z1.5_angle0.0_tilt60.0_tazi270.0	0.23	0.05	1.5	0	60	270	-8133.03	-8102.28	-31.6312	0.882614
frame_1176_x0.77_y0.05_z1.5_angle60.0_tilt60.0_tazi270.0	0.77	0.05	1.5	60	60	270	-8133.03	-8102.28	-31.6312	0.882614
frame_1188_x0.77_y0.05_z1.5_angle120.0_tilt60.0_tazi270.0	0.77	0.05	1.5	120	60	270	-8133.03	-8102.28	-31.6312	0.882614
frame_0324_x0.23_y0.05_z1.5_angle120.0_tilt60.0_tazi270.0	0.23	0.05	1.5	120	60	270	-8133.03	-8102.28	-31.6312	0.882614
frame_0336_x0.23_y0.05_z1.5_angle180.0_tilt60.0_tazi270.0	0.23	0.05	1.5	180	60	270	-8133.03	-8102.28	-31.6312	0.882615
frame_0827_x0.41_y0.95_z1.5_angle0.0_tilt60.0_tazi180.0	0.41	0.95	1.5	0	60	180	-8133.02	-8102.28	-31.6312	0.892687
frame_1113_x0.59_y0.95_z1.5_angle0.0_tilt60.0_tazi0.0	0.59	0.95	1.5	0	60	0	-8133.02	-8102.28	-31.6312	0.892687
frame_0851_x0.41_y0.95_z1.5_angle120.0_tilt60.0_tazi180.0	0.41	0.95	1.5	120	60	180	-8133.02	-8102.28	-31.6312	0.892687
frame_0863_x0.41_y0.95_z1.5_angle180.0_tilt60.0_tazi180.0	0.41	0.95	1.5	180	60	180	-8133.02	-8102.28	-31.6312	0.892687
frame_1125_x0.59_y0.95_z1.5_angle60.0_tilt60.0_tazi0.0	0.59	0.95	1.5	60	60	0	-8133.02	-8102.28	-31.6312	0.892688
frame_1137_x0.59_y0.95_z1.5_angle120.0_tilt60.0_tazi0.0	0.59	0.95	1.5	120	60	0	-8133.02	-8102.28	-31.6312	0.892697
frame_0839_x0.41_y0.95_z1.5_angle60.0_tilt60.0_tazi180.0	0.41	0.95	1.5	60	60	180	-8133.02	-8102.28	-31.6312	0.892703
frame_1149_x0.59_y0.95_z1.5_angle180.0_tilt60.0_tazi0.0	0.59	0.95	1.5	180	60	0	-8133.02	-8102.28	-31.6312	0.892706
frame_1282_x0.77_y0.41_z1.5_angle120.0_tilt60.0_tazi90.0	0.77	0.41	1.5	120	60	90	-8132.98	-8102.28	-31.6312	0.928023
frame_1270_x0.77_y0.41_z1.5_angle60.0_tilt60.0_tazi90.0	0.77	0.41	1.5	60	60	90	-8132.98	-8102.28	-31.6312	0.928023
frame_0418_x0.23_y0.41_z1.5_angle120.0_tilt60.0_tazi90.0	0.23	0.41	1.5	120	60	90	-8132.98	-8102.28	-31.6312	0.928024
frame_0406_x0.23_y0.41_z1.5_angle60.0_tilt60.0_tazi90.0	0.23	0.41	1.5	60	60	90	-8132.98	-8102.28	-31.6312	0.928024
frame_1294_x0.77_y0.41_z1.5_angle180.0_tilt60.0_tazi90.0	0.77	0.41	1.5	180	60	90	-8132.98	-8102.28	-31.6312	0.928025
frame_0430_x0.23_y0.41_z1.5_angle180.0_tilt60.0_tazi90.0	0.23	0.41	1.5	180	60	90	-8132.98	-8102.28	-31.6312	0.928025
frame_1258_x0.77_y0.41_z1.5_angle0.0_tilt60.0_tazi90.0	0.77	0.41	1.5	0	60	90	-8132.98	-8102.28	-31.6312	0.928025
frame_0394_x0.23_y0.41_z1.5_angle0.0_tilt60.0_tazi90.0	0.23	0.41	1.5	0	60	90	-8132.98	-8102.28	-31.6312	0.928025
frame_1160_x0.77_y0.05_z1.5_angle0.0_tilt30.0_tazi270.0	0.77	0.05	1.5	0	30	270	-8132.98	-8102.28	-31.6312	0.931445
frame_0320_x0.23_y0.05_z1.5_angle120.0_tilt30.0_tazi270.0	0.23	0.05	1.5	120	30	270	-8132.98	-8102.28	-31.6312	0.931448
frame_1184_x0.77_y0.05_z1.5_angle120.0_tilt30.0_tazi270.0	0.77	0.05	1.5	120	30	270	-8132.98	-8102.28	-31.6312	0.931449
frame_0296_x0.23_y0.05_z1.5_angle0.0_tilt30.0_tazi270.0	0.23	0.05	1.5	0	30	270	-8132.98	-8102.28	-31.6312	0.931451
frame_1172_x0.77_y0.05_z1.5_angle60.0_tilt30.0_tazi270.0	0.77	0.05	1.5	60	30	270	-8132.98	-8102.28	-31.6312	0.931451
frame_0332_x0.23_y0.05_z1.5_angle180.0_tilt30.0_tazi270.0	0.23	0.05	1.5	180	30	270	-8132.98	-8102.28	-31.6312	0.931452
frame_1196_x0.77_y0.05_z1.5_angle180.0_tilt30.0_tazi270.0	0.77	0.05	1.5	180	30	270	-8132.98	-8102.28	-31.6312	0.931454
frame_0308_x0.23_y0.05_z1.5_angle60.0_tilt30.0_tazi270.0	0.23	0.05	1.5	60	30	270	-8132.98	-8102.28	-31.6312	0.931454
frame_1152_x0.59_y0.95_z1.5_angle180.0_tilt60.0_tazi270.0	0.59	0.95	1.5	180	60	270	-8132.97	-8102.28	-31.6312	0.937628
frame_0864_x0.41_y0.95_z1.5_angle180.0_tilt60.0_tazi270.0	0.41	0.95	1.5	180	60	270	-8132.97	-8102.28	-31.6312	0.937629
frame_1140_x0.59_y0.95_z1.5_angle120.0_tilt60.0_tazi270.0	0.59	0.95	1.5	120	60	270	-8132.97	-8102.28	-31.6312	0.937629
frame_1128_x0.59_y0.95_z1.5_angle60.0_tilt60.0_tazi270.0	0.59	0.95	1.5	60	60	270	-8132.97	-8102.28	-31.6312	0.937639
frame_0840_x0.41_y0.95_z1.5_angle60.0_tilt60.0_tazi270.0	0.41	0.95	1.5	60	60	270	-8132.97	-8102.28	-31.6312	0.937639
frame_1116_x0.59_y0.95_z1.5_angle0.0_tilt60.0_tazi270.0	0.59	0.95	1.5	0	60	270	-8132.97	-8102.28	-31.6312	0.93764
frame_0852_x0.41_y0.95_z1.5_angle120.0_tilt60.0_tazi270.0	0.41	0.95	1.5	120	60	270	-8132.97	-8102.28	-31.6312	0.93764
frame_0828_x0.41_y0.95_z1.5_angle0.0_tilt60.0_tazi270.0	0.41	0.95	1.5	0	60	270	-8132.97	-8102.28	-31.6312	0.937641
frame_1439_x0.77_y0.95_z1.5_angle180.0_tilt60.0_tazi180.0	0.77	0.95	1.5	180	60	180	-8132.96	-8102.28	-31.6312	0.946715
frame_0537_x0.23_y0.95_z1.5_angle0.0_tilt60.0_tazi0.0	0.23	0.95	1.5	0	60	0	-8132.96	-8102.28	-31.6312	0.946715
frame_0549_x0.23_y0.95_z1.5_angle60.0_tilt60.0_tazi0.0	0.23	0.95	1.5	60	60	0	-8132.96	-8102.28	-31.6312	0.946716
frame_0561_x0.23_y0.95_z1.5_angle120.0_tilt60.0_tazi0.0	0.23	0.95	1.5	120	60	0	-8132.96	-8102.28	-31.6312	0.946716
frame_1415_x0.77_y0.95_z1.5_angle60.0_tilt60.0_tazi180.0	0.77	0.95	1.5	60	60	180	-8132.96	-8102.28	-31.6312	0.946716
frame_1427_x0.77_y0.95_z1.5_angle120.0_tilt60.0_tazi180.0	0.77	0.95	1.5	120	60	180	-8132.96	-8102.28	-31.6312	0.946717
frame_1403_x0.77_y0.95_z1.5_angle0.0_tilt60.0_tazi180.0	0.77	0.95	1.5	0	60	180	-8132.96	-8102.28	-31.6312	0.946717
frame_0573_x0.23_y0.95_z1.5_angle180.0_tilt60.0_tazi0.0	0.23	0.95	1.5	180	60	0	-8132.96	-8102.28	-31.6312	0.946717
frame_0924_x0.59_y0.23_z1.5_angle0.0_tilt60.0_tazi270.0	0.59	0.23	1.5	0	60	270	-8132.96	-8102.28	-31.6312	0.952335
frame_0648_x0.41_y0.23_z1.5_angle60.0_tilt60.0_tazi270.0	0.41	0.23	1.5	60	60	270	-8132.96	-8102.28	-31.6312	0.952336
frame_0936_x0.59_y0.23_z1.5_angle60.0_tilt60.0_tazi270.0	0.59	0.23	1.5	60	60	270	-8132.96	-8102.28	-31.6312	0.952337
frame_0672_x0.41_y0.23_z1.5_angle180.0_tilt60.0_tazi270.0	0.41	0.23	1.5	180	60	270	-8132.96	-8102.28	-31.6312	0.952338
frame_0948_x0.59_y0.23_z1.5_angle120.0_tilt60.0_tazi270.0	0.59	0.23	1.5	120	60	270	-8132.96	-8102.28	-31.6312	0.952338
frame_0636_x0.41_y0.23_z1.5_angle0.0_tilt60.0_tazi270.0	0.41	0.23	1.5	0	60	270	-8132.96	-8102.28	-31.6312	0.952338
frame_0960_x0.59_y0.23_z1.5_angle180.0_tilt60.0_tazi270.0	0.59	0.23	1.5	180	60	270	-8132.96	-8102.28	-31.6312	0.952338
frame_0660_x0.41_y0.23_z1.5_angle120.0_tilt60.0_tazi270.0	0.41	0.23	1.5	120	60	270	-8132.96	-8102.28	-31.6312	0.952339
frame_0106_x0.05_y0.41_z1.5_angle0.0_tilt60.0_tazi90.0	0.05	0.41	1.5	0	60	90	-8132.95	-8102.28	-31.6312	0.958869
frame_0130_x0.05_y0.41_z1.5_angle120.0_tilt60.0_tazi90.0	0.05	0.41	1.5	120	60	90	-8132.95	-8102.28	-31.6312	0.958871
frame_1546_x0.95_y0.41_z1.5_angle0.0_tilt60.0_tazi90.0	0.95	0.41	1.5	0	60	90	-8132.95	-8102.28	-31.6312	0.958872
frame_1570_x0.95_y0.41_z1.5_angle120.0_tilt60.0_tazi90.0	0.95	0.41	1.5	120	60	90	-8132.95	-8102.28	-31.6312	0.958879
frame_1582_x0.95_y0.41_z1.5_angle180.0_tilt60.0_tazi90.0	0.95	0.41	1.5	180	60	90	-8132.95	-8102.28	-31.6312	0.95888
frame_0118_x0.05_y0.41_z1.5_angle60.0_tilt60.0_tazi90.0	0.05	0.41	1.5	60	60	90	-8132.95	-8102.28	-31.6312	0.95888
frame_1558_x0.95_y0.41_z1.5_angle60.0_tilt60.0_tazi90.0	0.95	0.41	1.5	60	60	90	-8132.95	-8102.28	-31.6312	0.958881
frame_0142_x0.05_y0.41_z1.5_angle180.0_tilt60.0_tazi90.0	0.05	0.41	1.5	180	60	90	-8132.95	-8102.28	-31.6312	0.958881
frame_1538_x0.95_y0.41_z1.5_angle0.0_tilt0.0_tazi90.0	0.95	0.41	1.5	0	0	90	-8132.94	-8102.28	-31.6312	0.972836
frame_0097_x0.05_y0.41_z1.5_angle0.0_tilt0.0_tazi0.0	0.05	0.41	1.5	0	0	0	-8132.94	-8102.28	-31.6312	0.972837
frame_1551_x0.95_y0.41_z1.5_angle60.0_tilt0.0_tazi180.0	0.95	0.41	1.5	60	0	180	-8132.94	-8102.28	-31.6312	0.972837
frame_1549_x0.95_y0.41_z1.5_angle60.0_tilt0.0_tazi0.0	0.95	0.41	1.5	60	0	0	-8132.94	-8102.28	-31.6312	0.972837
frame_0124_x0.05_y0.41_z1.5_angle120.0_tilt0.0_tazi270.0	0.05	0.41	1.5	120	0	270	-8132.94	-8102.28	-31.6312	0.972837
frame_1550_x0.95_y0.41_z1.5_angle60.0_tilt0.0_tazi90.0	0.95	0.41	1.5	60	0	90	-8132.94	-8102.28	-31.6312	0.972837
frame_1575_x0.95_y0.41_z1.5_angle180.0_tilt0.0_tazi180.0	0.95	0.41	1.5	180	0	180	-8132.94	-8102.28	-31.6312	0.972837
frame_0098_x0.05_y0.41_z1.5_angle0.0_tilt0.0_tazi90.0	0.05	0.41	1.5	0	0	90	-8132.94	-8102.28	-31.6312	0.972837
frame_0100_x0.05_y0.41_z1.5_angle0.0_tilt0.0_tazi270.0	0.05	0.41	1.5	0	0	270	-8132.94	-8102.28	-31.6312	0.972837
frame_0109_x0.05_y0.41_z1.5_angle60.0_tilt0.0_tazi0.0	0.05	0.41	1.5	60	0	0	-8132.94	-8102.28	-31.6312	0.972837
frame_0134_x0.05_y0.41_z1.5_angle180.0_tilt0.0_tazi90.0	0.05	0.41	1.5	180	0	90	-8132.94	-8102.28	-31.6312	0.972837
frame_0110_x0.05_y0.41_z1.5_angle60.0_tilt0.0_tazi90.0	0.05	0.41	1.5	60	0	90	-8132.94	-8102.28	-31.6312	0.972838
frame_0123_x0.05_y0.41_z1.5_angle120.0_tilt0.0_tazi180.0	0.05	0.41	1.5	120	0	180	-8132.94	-8102.28	-31.6312	0.972838
frame_1561_x0.95_y0.41_z1.5_angle120.0_tilt0.0_tazi0.0	0.95	0.41	1.5	120	0	0	-8132.94	-8102.28	-31.6312	0.972838
frame_1573_x0.95_y0.41_z1.5_angle180.0_tilt0.0_tazi0.0	0.95	0.41	1.5	180	0	0	-8132.94	-8102.28	-31.6312	0.972838
frame_1539_x0.95_y0.41_z1.5_angle0.0_tilt0.0_tazi180.0	0.95	0.41	1.5	0	0	180	-8132.94	-8102.28	-31.6312	0.972838
frame_0099_x0.05_y0.41_z1.5_angle0.0_tilt0.0_tazi180.0	0.05	0.41	1.5	0	0	180	-8132.94	-8102.28	-31.6312	0.972838
frame_1552_x0.95_y0.41_z1.5_angle60.0_tilt0.0_tazi270.0	0.95	0.41	1.5	60	0	270	-8132.94	-8102.28	-31.6312	0.972838
frame_1562_x0.95_y0.41_z1.5_angle120.0_tilt0.0_tazi90.0	0.95	0.41	1.5	120	0	90	-8132.94	-8102.28	-31.6312	0.972838
frame_0133_x0.05_y0.41_z1.5_angle180.0_tilt0.0_tazi0.0	0.05	0.41	1.5	180	0	0	-8132.94	-8102.28	-31.6312	0.972839
frame_0136_x0.05_y0.41_z1.5_angle180.0_tilt0.0_tazi270.0	0.05	0.41	1.5	180	0	270	-8132.94	-8102.28	-31.6312	0.972839
frame_0122_x0.05_y0.41_z1.5_angle120.0_tilt0.0_tazi90.0	0.05	0.41	1.5	120	0	90	-8132.94	-8102.28	-31.6312	0.972839
frame_1537_x0.95_y0.41_z1.5_angle0.0_tilt0.0_tazi0.0	0.95	0.41	1.5	0	0	0	-8132.94	-8102.28	-31.6312	0.972839
frame_1564_x0.95_y0.41_z1.5_angle120.0_tilt0.0_tazi270.0	0.95	0.41	1.5	120	0	270	-8132.94	-8102.28	-31.6312	0.972839
frame_1574_x0.95_y0.41_z1.5_angle180.0_tilt0.0_tazi90.0	0.95	0.41	1.5	180	0	90	-8132.94	-8102.28	-31.6312	0.97284
frame_1576_x0.95_y0.41_z1.5_angle180.0_tilt0.0_tazi270.0	0.95	0.41	1.5	180	0	270	-8132.94	-8102.28	-31.6312	0.972841
frame_0112_x0.05_y0.41_z1.5_angle60.0_tilt0.0_tazi270.0	0.05	0.41	1.5	60	0	270	-8132.94	-8102.28	-31.6312	0.972841
frame_0111_x0.05_y0.41_z1.5_angle60.0_tilt0.0_tazi180.0	0.05	0.41	1.5	60	0	180	-8132.94	-8102.28	-31.6312	0.972841
frame_1563_x0.95_y0.41_z1.5_angle120.0_tilt0.0_tazi180.0	0.95	0.41	1.5	120	0	180	-8132.94	-8102.28	-31.6312	0.972842
frame_0121_x0.05_y0.41_z1.5_angle120.0_tilt0.0_tazi0.0	0.05	0.41	1.5	120	0	0	-8132.94	-8102.28	-31.6312	0.972842
frame_0135_x0.05_y0.41_z1.5_angle180.0_tilt0.0_tazi180.0	0.05	0.41	1.5	180	0	180	-8132.94	-8102.28	-31.6312	0.972842
frame_1540_x0.95_y0.41_z1.5_angle0.0_tilt0.0_tazi270.0	0.95	0.41	1.5	0	0	270	-8132.94	-8102.28	-31.6312	0.972842
frame_0444_x0.23_y0.59_z1.5_angle0.0_tilt60.0_tazi270.0	0.23	0.59	1.5	0	60	270	-8132.94	-8102.28	-31.6312	0.97356
frame_1344_x0.77_y0.59_z1.5_angle180.0_tilt60.0_tazi270.0	0.77	0.59	1.5	180	60	270	-8132.94	-8102.28	-31.6312	0.97356
frame_1308_x0.77_y0.59_z1.5_angle0.0_tilt60.0_tazi270.0	0.77	0.59	1.5	0	60	270	-8132.94	-8102.28	-31.6312	0.97356
frame_1332_x0.77_y0.59_z1.5_angle120.0_tilt60.0_tazi270.0	0.77	0.59	1.5	120	60	270	-8132.94	-8102.28	-31.6312	0.973561
frame_1320_x0.77_y0.59_z1.5_angle60.0_tilt60.0_tazi270.0	0.77	0.59	1.5	60	60	270	-8132.94	-8102.28	-31.6312	0.973564
frame_0480_x0.23_y0.59_z1.5_angle180.0_tilt60.0_tazi270.0	0.23	0.59	1.5	180	60	270	-8132.94	-8102.28	-31.6312	0.973564
frame_0468_x0.23_y0.59_z1.5_angle120.0_tilt60.0_tazi270.0	0.23	0.59	1.5	120	60	270	-8132.94	-8102.28	-31.6312	0.973564
frame_0456_x0.23_y0.59_z1.5_angle60.0_tilt60.0_tazi270.0	0.23	0.59	1.5	60	60	270	-8132.94	-8102.28	-31.6312	0.973566
frame_0455_x0.23_y0.59_z1.5_angle60.0_tilt60.0_tazi180.0	0.23	0.59	1.5	60	60	180	-8132.93	-8102.28	-31.6312	0.977828
frame_1329_x0.77_y0.59_z1.5_angle120.0_tilt60.0_tazi0.0	0.77	0.59	1.5	120	60	0	-8132.93	-8102.28	-31.6312	0.977829
frame_1305_x0.77_y0.59_z1.5_angle0.0_tilt60.0_tazi0.0	0.77	0.59	1.5	0	60	0	-8132.93	-8102.28	-31.6312	0.977829
frame_0479_x0.23_y0.59_z1.5_angle180.0_tilt60.0_tazi180.0	0.23	0.59	1.5	180	60	180	-8132.93	-8102.28	-31.6312	0.977829
frame_0443_x0.23_y0.59_z1.5_angle0.0_tilt60.0_tazi180.0	0.23	0.59	1.5	0	60	180	-8132.93	-8102.28	-31.6312	0.977837
frame_1317_x0.77_y0.59_z1.5_angle60.0_tilt60.0_tazi0.0	0.77	0.59	1.5	60	60	0	-8132.93	-8102.28	-31.6312	0.977838
frame_0467_x0.23_y0.59_z1.5_angle120.0_tilt60.0_tazi180.0	0.23	0.59	1.5	120	60	180	-8132.93	-8102.28	-31.6312	0.977839
frame_1341_x0.77_y0.59_z1.5_angle180.0_tilt60.0_tazi0.0	0.77	0.59	1.5	180	60	0	-8132.93	-8102.28	-31.6312	0.97784
frame_1183_x0.77_y0.05_z1.5_angle120.0_tilt30.0_tazi180.0	0.77	0.05	1.5	120	30	180	-8132.93	-8102.28	-31.6312	0.977956
frame_0317_x0.23_y0.05_z1.5_angle120.0_tilt30.0_tazi0.0	0.23	0.05	1.5	120	30	0	-8132.93	-8102.28	-31.6312	0.977959
frame_0293_x0.23_y0.05_z1.5_angle0.0_tilt30.0_tazi0.0	0.23	0.05	1.5	0	30	0	-8132.93	-8102.28	-31.6312	0.97796
frame_1171_x0.77_y0.05_z1.5_angle60.0_tilt30.0_tazi180.0	0.77	0.05	1.5	60	30	180	-8132.93	-8102.28	-31.6312	0.977961
frame_0329_x0.23_y0.05_z1.5_angle180.0_tilt30.0_tazi0.0	0.23	0.05	1.5	180	30	0	-8132.93	-8102.28	-31.6312	0.977963
frame_1159_x0.77_y0.05_z1.5_angle0.0_tilt30.0_tazi180.0	0.77	0.05	1.5	0	30	180	-8132.93	-8102.28	-31.6312	0.977963
frame_1195_x0.77_y0.05_z1.5_angle180.0_tilt30.0_tazi180.0	0.77	0.05	1.5	180	30	180	-8132.93	-8102.28	-31.6312	0.977964
frame_0305_x0.23_y0.05_z1.5_angle60.0_tilt30.0_tazi0.0	0.23	0.05	1.5	60	30	0	-8132.93	-8102.28	-31.6312	0.977965
frame_1342_x0.77_y0.59_z1.5_angle180.0_tilt60.0_tazi90.0	0.77	0.59	1.5	180	60	90	-8132.93	-8102.28	-31.6312	0.978364
frame_0454_x0.23_y0.59_z1.5_angle60.0_tilt60.0_tazi90.0	0.23	0.59	1.5	60	60	90	-8132.93	-8102.28	-31.6312	0.978364
frame_1306_x0.77_y0.59_z1.5_angle0.0_tilt60.0_tazi90.0	0.77	0.59	1.5	0	60	90	-8132.93	-8102.28	-31.6312	0.978364
frame_1318_x0.77_y0.59_z1.5_angle60.0_tilt60.0_tazi90.0	0.77	0.59	1.5	60	60	90	-8132.93	-8102.28	-31.6312	0.978364
frame_0478_x0.23_y0.59_z1.5_angle180.0_tilt60.0_tazi90.0	0.23	0.59	1.5	180	60	90	-8132.93	-8102.28	-31.6312	0.978364
frame_0466_x0.23_y0.59_z1.5_angle120.0_tilt60.0_tazi90.0	0.23	0.59	1.5	120	60	90	-8132.93	-8102.28	-31.6312	0.978364
frame_1330_x0.77_y0.59_z1.5_angle120.0_tilt60.0_tazi90.0	0.77	0.59	1.5	120	60	90	-8132.93	-8102.28	-31.6312	0.978364
frame_0442_x0.23_y0.59_z1.5_angle0.0_tilt60.0_tazi90.0	0.23	0.59	1.5	0	60	90	-8132.93	-8102.28	-31.6312	0.978364
frame_0847_x0.41_y0.95_z1.5_angle120.0_tilt30.0_tazi180.0	0.41	0.95	1.5	120	30	180	-8132.93	-8102.28	-31.6312	0.978375
frame_1133_x0.59_y0.95_z1.5_angle120.0_tilt30.0_tazi0.0	0.59	0.95	1.5	120	30	0	-8132.93	-8102.28	-31.6312	0.978376
frame_0823_x0.41_y0.95_z1.5_angle0.0_tilt30.0_tazi180.0	0.41	0.95	1.5	0	30	180	-8132.93	-8102.28	-31.6312	0.978376
frame_1145_x0.59_y0.95_z1.5_angle180.0_tilt30.0_tazi0.0	0.59	0.95	1.5	180	30	0	-8132.93	-8102.28	-31.6312	0.978376
frame_1109_x0.59_y0.95_z1.5_angle0.0_tilt30.0_tazi0.0	0.59	0.95	1.5	0	30	0	-8132.93	-8102.28	-31.6312	0.978376
frame_0859_x0.41_y0.95_z1.5_angle180.0_tilt30.0_tazi180.0	0.41	0.95	1.5	180	30	180	-8132.93	-8102.28	-31.6312	0.978376
frame_1121_x0.59_y0.95_z1.5_angle60.0_tilt30.0_tazi0.0	0.59	0.95	1.5	60	30	0	-8132.93	-8102.28	-31.6312	0.978377
frame_0835_x0.41_y0.95_z1.5_angle60.0_tilt30.0_tazi180.0	0.41	0.95	1.5	60	30	180	-8132.93	-8102.28	-31.6312	0.978378
frame_1193_x0.77_y0.05_z1.5_angle180.0_tilt30.0_tazi0.0	0.77	0.05	1.5	180	30	0	-8132.91	-8102.28	-31.6312	0.999742
frame_1157_x0.77_y0.05_z1.5_angle0.0_tilt30.0_tazi0.0	0.77	0.05	1.5	0	30	0	-8132.91	-8102.28	-31.6312	0.999742
frame_0331_x0.23_y0.05_z1.5_angle180.0_tilt30.0_tazi180.0	0.23	0.05	1.5	180	30	180	-8132.91	-8102.28	-31.6312	0.999743
frame_0307_x0.23_y0.05_z1.5_angle60.0_tilt30.0_tazi180.0	0.23	0.05	1.5	60	30	180	-8132.91	-8102.28	-31.6312	0.999743
frame_1181_x0.77_y0.05_z1.5_angle120.0_tilt30.0_tazi0.0	0.77	0.05	1.5	120	30	0	-8132.91	-8102.28	-31.6312	0.999743
frame_0319_x0.23_y0.05_z1.5_angle120.0_tilt30.0_tazi180.0	0.23	0.05	1.5	120	30	180	-8132.91	-8102.28	-31.6312	0.999744
frame_1169_x0.77_y0.05_z1.5_angle60.0_tilt30.0_tazi0.0	0.77	0.05	1.5	60	30	0	-8132.91	-8102.28	-31.6312	0.999745
frame_0295_x0.23_y0.05_z1.5_angle0.0_tilt30.0_tazi180.0	0.23	0.05	1.5	0	30	180	-8132.91	-8102.28	-31.6312	0.999745
frame_1136_x0.59_y0.95_z1.5_angle120.0_tilt30.0_tazi270.0	0.59	0.95	1.5	120	30	270	-8132.88	-8102.28	-31.6312	1.02601
frame_1112_x0.59_y0.95_z1.5_angle0.0_tilt30.0_tazi270.0	0.59	0.95	1.5	0	30	270	-8132.88	-8102.28	-31.6312	1.02602
frame_0848_x0.41_y0.95_z1.5_angle120.0_tilt30.0_tazi270.0	0.41	0.95	1.5	120	30	270	-8132.88	-8102.28	-31.6312	1.02602
frame_0836_x0.41_y0.95_z1.5_angle60.0_tilt30.0_tazi270.0	0.41	0.95	1.5	60	30	270	-8132.88	-8102.28	-31.6312	1.02602
frame_0860_x0.41_y0.95_z1.5_angle180.0_tilt30.0_tazi270.0	0.41	0.95	1.5	180	30	270	-8132.88	-8102.28	-31.6312	1.02602
frame_1124_x0.59_y0.95_z1.5_angle60.0_tilt30.0_tazi270.0	0.59	0.95	1.5	60	30	270	-8132.88	-8102.28	-31.6312	1.02602
frame_1148_x0.59_y0.95_z1.5_angle180.0_tilt30.0_tazi270.0	0.59	0.95	1.5	180	30	270	-8132.88	-8102.28	-31.6312	1.02602
frame_0824_x0.41_y0.95_z1.5_angle0.0_tilt30.0_tazi270.0	0.41	0.95	1.5	0	30	270	-8132.88	-8102.28	-31.6312	1.02602
frame_1363_x0.77_y0.77_z1.5_angle60.0_tilt30.0_tazi180.0	0.77	0.77	1.5	60	30	180	-8132.88	-8102.28	-31.6312	1.03053
frame_1375_x0.77_y0.77_z1.5_angle120.0_tilt30.0_tazi180.0	0.77	0.77	1.5	120	30	180	-8132.88	-8102.28	-31.6312	1.03053
frame_0497_x0.23_y0.77_z1.5_angle60.0_tilt30.0_tazi0.0	0.23	0.77	1.5	60	30	0	-8132.88	-8102.28	-31.6312	1.03053
frame_1351_x0.77_y0.77_z1.5_angle0.0_tilt30.0_tazi180.0	0.77	0.77	1.5	0	30	180	-8132.88	-8102.28	-31.6312	1.03053
frame_0509_x0.23_y0.77_z1.5_angle120.0_tilt30.0_tazi0.0	0.23	0.77	1.5	120	30	0	-8132.88	-8102.28	-31.6312	1.03055
frame_1387_x0.77_y0.77_z1.5_angle180.0_tilt30.0_tazi180.0	0.77	0.77	1.5	180	30	180	-8132.88	-8102.28	-31.6312	1.03055
frame_0485_x0.23_y0.77_z1.5_angle0.0_tilt30.0_tazi0.0	0.23	0.77	1.5	0	30	0	-8132.88	-8102.28	-31.6312	1.03055
frame_0521_x0.23_y0.77_z1.5_angle180.0_tilt30.0_tazi0.0	0.23	0.77	1.5	180	30	0	-8132.88	-8102.28	-31.6312	1.03055
frame_1168_x0.77_y0.05_z1.5_angle60.0_tilt0.0_tazi270.0	0.77	0.05	1.5	60	0	270	-8132.88	-8102.28	-31.6312	1.03406
frame_0289_x0.23_y0.05_z1.5_angle0.0_tilt0.0_tazi0.0	0.23	0.05	1.5	0	0	0	-8132.88	-8102.28	-31.6312	1.03406
frame_0327_x0.23_y0.05_z1.5_angle180.0_tilt0.0_tazi180.0	0.23	0.05	1.5	180	0	180	-8132.88	-8102.28	-31.6312	1.03406
frame_1178_x0.77_y0.05_z1.5_angle120.0_tilt0.0_tazi90.0	0.77	0.05	1.5	120	0	90	-8132.88	-8102.28	-31.6312	1.03406
frame_1190_x0.77_y0.05_z1.5_angle180.0_tilt0.0_tazi90.0	0.77	0.05	1.5	180	0	90	-8132.88	-8102.28	-31.6312	1.03407
frame_0315_x0.23_y0.05_z1.5_angle120.0_tilt0.0_tazi180.0	0.23	0.05	1.5	120	0	180	-8132.88	-8102.28	-31.6312	1.03407
frame_0304_x0.23_y0.05_z1.5_angle60.0_tilt0.0_tazi270.0	0.23	0.05	1.5	60	0	270	-8132.88	-8102.28	-31.6312	1.03407
frame_0328_x0.23_y0.05_z1.5_angle180.0_tilt0.0_tazi270.0	0.23	0.05	1.5	180	0	270	-8132.88	-8102.28	-31.6312	1.03407
frame_1180_x0.77_y0.05_z1.5_angle120.0_tilt0.0_tazi270.0	0.77	0.05	1.5	120	0	270	-8132.88	-8102.28	-31.6312	1.03407
frame_1153_x0.77_y0.05_z1.5_angle0.0_tilt0.0_tazi0.0	0.77	0.05	1.5	0	0	0	-8132.88	-8102.28	-31.6312	1.03407
frame_0314_x0.23_y0.05_z1.5_angle120.0_tilt0.0_tazi90.0	0.23	0.05	1.5	120	0	90	-8132.88	-8102.28	-31.6312	1.03407
frame_1154_x0.77_y0.05_z1.5_angle0.0_tilt0.0_tazi90.0	0.77	0.05	1.5	0	0	90	-8132.88	-8102.28	-31.6312	1.03407
frame_1177_x0.77_y0.05_z1.5_angle120.0_tilt0.0_tazi0.0	0.77	0.05	1.5	120	0	0	-8132.88	-8102.28	-31.6312	1.03407
frame_0301_x0.23_y0.05_z1.5_angle60.0_tilt0.0_tazi0.0	0.23	0.05	1.5	60	0	0	-8132.88	-8102.28	-31.6312	1.03407
frame_1155_x0.77_y0.05_z1.5_angle0.0_tilt0.0_tazi180.0	0.77	0.05	1.5	0	0	180	-8132.88	-8102.28	-31.6312	1.03407
frame_0302_x0.23_y0.05_z1.5_angle60.0_tilt0.0_tazi90.0	0.23	0.05	1.5	60	0	90	-8132.88	-8102.28	-31.6312	1.03407
frame_0290_x0.23_y0.05_z1.5_angle0.0_tilt0.0_tazi90.0	0.23	0.05	1.5	0	0	90	-8132.88	-8102.28	-31.6312	1.03407
frame_0292_x0.23_y0.05_z1.5_angle0.0_tilt0.0_tazi270.0	0.23	0.05	1.5	0	0	270	-8132.88	-8102.28	-31.6312	1.03407
frame_1179_x0.77_y0.05_z1.5_angle120.0_tilt0.0_tazi180.0	0.77	0.05	1.5	120	0	180	-8132.88	-8102.28	-31.6312	1.03407
frame_1167_x0.77_y0.05_z1.5_angle60.0_tilt0.0_tazi180.0	0.77	0.05	1.5	60	0	180	-8132.88	-8102.28	-31.6312	1.03407
frame_1165_x0.77_y0.05_z1.5_angle60.0_tilt0.0_tazi0.0	0.77	0.05	1.5	60	0	0	-8132.88	-8102.28	-31.6312	1.03407
frame_1166_x0.77_y0.05_z1.5_angle60.0_tilt0.0_tazi90.0	0.77	0.05	1.5	60	0	90	-8132.88	-8102.28	-31.6312	1.03407
frame_0303_x0.23_y0.05_z1.5_angle60.0_tilt0.0_tazi180.0	0.23	0.05	1.5	60	0	180	-8132.88	-8102.28	-31.6312	1.03407
frame_0325_x0.23_y0.05_z1.5_angle180.0_tilt0.0_tazi0.0	0.23	0.05	1.5	180	0	0	-8132.88	-8102.28	-31.6312	1.03407
frame_1192_x0.77_y0.05_z1.5_angle180.0_tilt0.0_tazi270.0	0.77	0.05	1.5	180	0	270	-8132.88	-8102.28	-31.6312	1.03407
frame_1191_x0.77_y0.05_z1.5_angle180.0_tilt0.0_tazi180.0	0.77	0.05	1.5	180	0	180	-8132.88	-8102.28	-31.6312	1.03407
frame_0316_x0.23_y0.05_z1.5_angle120.0_tilt0.0_tazi270.0	0.23	0.05	1.5	120	0	270	-8132.88	-8102.28	-31.6312	1.03407
frame_0313_x0.23_y0.05_z1.5_angle120.0_tilt0.0_tazi0.0	0.23	0.05	1.5	120	0	0	-8132.88	-8102.28	-31.6312	1.03407
frame_1156_x0.77_y0.05_z1.5_angle0.0_tilt0.0_tazi270.0	0.77	0.05	1.5	0	0	270	-8132.88	-8102.28	-31.6312	1.03407
frame_0326_x0.23_y0.05_z1.5_angle180.0_tilt0.0_tazi90.0	0.23	0.05	1.5	180	0	90	-8132.88	-8102.28	-31.6312	1.03407
frame_1189_x0.77_y0.05_z1.5_angle180.0_tilt0.0_tazi0.0	0.77	0.05	1.5	180	0	0	-8132.88	-8102.28	-31.6312	1.03408
frame_0291_x0.23_y0.05_z1.5_angle0.0_tilt0.0_tazi180.0	0.23	0.05	1.5	0	0	180	-8132.88	-8102.28	-31.6312	1.03408
frame_0322_x0.23_y0.05_z1.5_angle120.0_tilt60.0_tazi90.0	0.23	0.05	1.5	120	60	90	-8132.87	-8102.28	-31.6312	1.03716
frame_0334_x0.23_y0.05_z1.5_angle180.0_tilt60.0_tazi90.0	0.23	0.05	1.5	180	60	90	-8132.87	-8102.28	-31.6312	1.03716
frame_1186_x0.77_y0.05_z1.5_angle120.0_tilt60.0_tazi90.0	0.77	0.05	1.5	120	60	90	-8132.87	-8102.28	-31.6312	1.03716
frame_0298_x0.23_y0.05_z1.5_angle0.0_tilt60.0_tazi90.0	0.23	0.05	1.5	0	60	90	-8132.87	-8102.28	-31.6312	1.03716
frame_1198_x0.77_y0.05_z1.5_angle180.0_tilt60.0_tazi90.0	0.77	0.05	1.5	180	60	90	-8132.87	-8102.28	-31.6312	1.03716
frame_1174_x0.77_y0.05_z1.5_angle60.0_tilt60.0_tazi90.0	0.77	0.05	1.5	60	60	90	-8132.87	-8102.28	-31.6312	1.03716
frame_0310_x0.23_y0.05_z1.5_angle60.0_tilt60.0_tazi90.0	0.23	0.05	1.5	60	60	90	-8132.87	-8102.28	-31.6312	1.03716
frame_1162_x0.77_y0.05_z1.5_angle0.0_tilt60.0_tazi90.0	0.77	0.05	1.5	0	60	90	-8132.87	-8102.28	-31.6312	1.03717
frame_1620_x0.95_y0.59_z1.5_angle120.0_tilt60.0_tazi270.0	0.95	0.59	1.5	120	60	270	-8132.86	-8102.28	-31.6312	1.04491
frame_1632_x0.95_y0.59_z1.5_angle180.0_tilt60.0_tazi270.0	0.95	0.59	1.5	180	60	270	-8132.86	-8102.28	-31.6312	1.04491
frame_1596_x0.95_y0.59_z1.5_angle0.0_tilt60.0_tazi270.0	0.95	0.59	1.5	0	60	270	-8132.86	-8102.28	-31.6312	1.04491
frame_0192_x0.05_y0.59_z1.5_angle180.0_tilt60.0_tazi270.0	0.05	0.59	1.5	180	60	270	-8132.86	-8102.28	-31.6312	1.04491
frame_0180_x0.05_y0.59_z1.5_angle120.0_tilt60.0_tazi270.0	0.05	0.59	1.5	120	60	270	-8132.86	-8102.28	-31.6312	1.04491
frame_1608_x0.95_y0.59_z1.5_angle60.0_tilt60.0_tazi270.0	0.95	0.59	1.5	60	60	270	-8132.86	-8102.28	-31.6312	1.04491
frame_0168_x0.05_y0.59_z1.5_angle60.0_tilt60.0_tazi270.0	0.05	0.59	1.5	60	60	270	-8132.86	-8102.28	-31.6312	1.04491
frame_0156_x0.05_y0.59_z1.5_angle0.0_tilt60.0_tazi270.0	0.05	0.59	1.5	0	60	270	-8132.86	-8102.28	-31.6312	1.04492
frame_1325_x0.77_y0.59_z1.5_angle120.0_tilt30.0_tazi0.0	0.77	0.59	1.5	120	30	0	-8132.86	-8102.28	-31.6312	1.04654
frame_1313_x0.77_y0.59_z1.5_angle60.0_tilt30.0_tazi0.0	0.77	0.59	1.5	60	30	0	-8132.86	-8102.28	-31.6312	1.04654
frame_0463_x0.23_y0.59_z1.5_angle120.0_tilt30.0_tazi180.0	0.23	0.59	1.5	120	30	180	-8132.86	-8102.28	-31.6312	1.04654
frame_1337_x0.77_y0.59_z1.5_angle180.0_tilt30.0_tazi0.0	0.77	0.59	1.5	180	30	0	-8132.86	-8102.28	-31.6312	1.04654
frame_0439_x0.23_y0.59_z1.5_angle0.0_tilt30.0_tazi180.0	0.23	0.59	1.5	0	30	180	-8132.86	-8102.28	-31.6312	1.04655
frame_0475_x0.23_y0.59_z1.5_angle180.0_tilt30.0_tazi180.0	0.23	0.59	1.5	180	30	180	-8132.86	-8102.28	-31.6312	1.04655
frame_0451_x0.23_y0.59_z1.5_angle60.0_tilt30.0_tazi180.0	0.23	0.59	1.5	60	30	180	-8132.86	-8102.28	-31.6312	1.04656
frame_1301_x0.77_y0.59_z1.5_angle0.0_tilt30.0_tazi0.0	0.77	0.59	1.5	0	30	0	-8132.86	-8102.28	-31.6312	1.04656
frame_0500_x0.23_y0.77_z1.5_angle60.0_tilt30.0_tazi270.0	0.23	0.77	1.5	60	30	270	-8132.86	-8102.28	-31.6312	1.04742
frame_0524_x0.23_y0.77_z1.5_angle180.0_tilt30.0_tazi270.0	0.23	0.77	1.5	180	30	270	-8132.86	-8102.28	-31.6312	1.04742
frame_0488_x0.23_y0.77_z1.5_angle0.0_tilt30.0_tazi270.0	0.23	0.77	1.5	0	30	270	-8132.86	-8102.28	-31.6312	1.04742
frame_1364_x0.77_y0.77_z1.5_angle60.0_tilt30.0_tazi270.0	0.77	0.77	1.5	60	30	270	-8132.86	-8102.28	-31.6312	1.04742
frame_1388_x0.77_y0.77_z1.5_angle180.0_tilt30.0_tazi270.0	0.77	0.77	1.5	180	30	270	-8132.86	-8102.28	-31.6312	1.04742
frame_0512_x0.23_y0.77_z1.5_angle120.0_tilt30.0_tazi270.0	0.23	0.77	1.5	120	30	270	-8132.86	-8102.28	-31.6312	1.04742
frame_1352_x0.77_y0.77_z1.5_angle0.0_tilt30.0_tazi270.0	0.77	0.77	1.5	0	30	270	-8132.86	-8102.28	-31.6312	1.04742
frame_1376_x0.77_y0.77_z1.5_angle120.0_tilt30.0_tazi270.0	0.77	0.77	1.5	120	30	270	-8132.86	-8102.28	-31.6312	1.04742
frame_1697_x0.95_y0.95_z1.5_angle60.0_tilt30.0_tazi0.0	0.95	0.95	1.5	60	30	0	-8132.86	-8102.28	-31.6312	1.054
frame_1721_x0.95_y0.95_z1.5_angle180.0_tilt30.0_tazi0.0	0.95	0.95	1.5	180	30	0	-8132.86	-8102.28	-31.6312	1.054
frame_1709_x0.95_y0.95_z1.5_angle120.0_tilt30.0_tazi0.0	0.95	0.95	1.5	120	30	0	-8132.86	-8102.28	-31.6312	1.054
frame_0271_x0.05_y0.95_z1.5_angle120.0_tilt30.0_tazi180.0	0.05	0.95	1.5	120	30	180	-8132.86	-8102.28	-31.6312	1.054
frame_1685_x0.95_y0.95_z1.5_angle0.0_tilt30.0_tazi0.0	0.95	0.95	1.5	0	30	0	-8132.86	-8102.28	-31.6312	1.054
frame_0259_x0.05_y0.95_z1.5_angle60.0_tilt30.0_tazi180.0	0.05	0.95	1.5	60	30	180	-8132.86	-8102.28	-31.6312	1.054
frame_0247_x0.05_y0.95_z1.5_angle0.0_tilt30.0_tazi180.0	0.05	0.95	1.5	0	30	180	-8132.86	-8102.28	-31.6312	1.054
frame_0283_x0.05_y0.95_z1.5_angle180.0_tilt30.0_tazi180.0	0.05	0.95	1.5	180	30	180	-8132.86	-8102.28	-31.6312	1.05401
frame_1618_x0.95_y0.59_z1.5_angle120.0_tilt60.0_tazi90.0	0.95	0.59	1.5	120	60	90	-8132.85	-8102.28	-31.6312	1.05661
frame_0178_x0.05_y0.59_z1.5_angle120.0_tilt60.0_tazi90.0	0.05	0.59	1.5	120	60	90	-8132.85	-8102.28	-31.6312	1.05661
frame_1594_x0.95_y0.59_z1.5_angle0.0_tilt60.0_tazi90.0	0.95	0.59	1.5	0	60	90	-8132.85	-8102.28	-31.6312	1.05661
frame_1630_x0.95_y0.59_z1.5_angle180.0_tilt60.0_tazi90.0	0.95	0.59	1.5	180	60	90	-8132.85	-8102.28	-31.6312	1.05661
frame_0166_x0.05_y0.59_z1.5_angle60.0_tilt60.0_tazi90.0	0.05	0.59	1.5	60	60	90	-8132.85	-8102.28	-31.6312	1.05661
frame_0154_x0.05_y0.59_z1.5_angle0.0_tilt60.0_tazi90.0	0.05	0.59	1.5	0	60	90	-8132.85	-8102.28	-31.6312	1.05661
frame_0190_x0.05_y0.59_z1.5_angle180.0_tilt60.0_tazi90.0	0.05	0.59	1.5	180	60	90	-8132.85	-8102.28	-31.6312	1.05661
frame_1606_x0.95_y0.59_z1.5_angle60.0_tilt60.0_tazi90.0	0.95	0.59	1.5	60	60	90	-8132.85	-8102.28	-31.6312	1.05661
frame_0441_x0.23_y0.59_z1.5_angle0.0_tilt60.0_tazi0.0	0.23	0.59	1.5	0	60	0	-8132.85	-8102.28	-31.6312	1.06106
frame_1343_x0.77_y0.59_z1.5_angle180.0_tilt60.0_tazi180.0	0.77	0.59	1.5	180	60	180	-8132.85	-8102.28	-31.6312	1.06106
frame_0477_x0.23_y0.59_z1.5_angle180.0_tilt60.0_tazi0.0	0.23	0.59	1.5	180	60	0	-8132.85	-8102.28	-31.6312	1.06106
frame_0453_x0.23_y0.59_z1.5_angle60.0_tilt60.0_tazi0.0	0.23	0.59	1.5	60	60	0	-8132.85	-8102.28	-31.6312	1.06106
frame_1319_x0.77_y0.59_z1.5_angle60.0_tilt60.0_tazi180.0	0.77	0.59	1.5	60	60	180	-8132.85	-8102.28	-31.6312	1.06106
frame_1307_x0.77_y0.59_z1.5_angle0.0_tilt60.0_tazi180.0	0.77	0.59	1.5	0	60	180	-8132.85	-8102.28	-31.6312	1.06106
frame_0465_x0.23_y0.59_z1.5_angle120.0_tilt60.0_tazi0.0	0.23	0.59	1.5	120	60	0	-8132.85	-8102.28	-31.6312	1.06106
frame_1331_x0.77_y0.59_z1.5_angle120.0_tilt60.0_tazi180.0	0.77	0.59	1.5	120	60	180	-8132.85	-8102.28	-31.6312	1.06106
frame_0452_x0.23_y0.59_z1.5_angle60.0_tilt30.0_tazi270.0	0.23	0.59	1.5	60	30	270	-8132.84	-8102.28	-31.6312	1.07224
frame_0476_x0.23_y0.59_z1.5_angle180.0_tilt30.0_tazi270.0	0.23	0.59	1.5	180	30	270	-8132.84	-8102.28	-31.6312	1.07224
frame_1328_x0.77_y0.59_z1.5_angle120.0_tilt30.0_tazi270.0	0.77	0.59	1.5	120	30	270	-8132.84	-8102.28	-31.6312	1.07225
frame_0464_x0.23_y0.59_z1.5_angle120.0_tilt30.0_tazi270.0	0.23	0.59	1.5	120	30	270	-8132.84	-8102.28	-31.6312	1.07225
frame_1316_x0.77_y0.59_z1.5_angle60.0_tilt30.0_tazi270.0	0.77	0.59	1.5	60	30	270	-8132.84	-8102.28	-31.6312	1.07225
frame_0440_x0.23_y0.59_z1.5_angle0.0_tilt30.0_tazi270.0	0.23	0.59	1.5	0	30	270	-8132.84	-8102.28	-31.6312	1.07225
frame_1340_x0.77_y0.59_z1.5_angle180.0_tilt30.0_tazi270.0	0.77	0.59	1.5	180	30	270	-8132.84	-8102.28	-31.6312	1.07226
frame_1304_x0.77_y0.59_z1.5_angle0.0_tilt30.0_tazi270.0	0.77	0.59	1.5	0	30	270	-8132.84	-8102.28	-31.6312	1.07226
frame_0318_x0.23_y0.05_z1.5_angle120.0_tilt30.0_tazi90.0	0.23	0.05	1.5	120	30	90	-8132.84	-8102.28	-31.6312	1.07269
frame_0294_x0.23_y0.05_z1.5_angle0.0_tilt30.0_tazi90.0	0.23	0.05	1.5	0	30	90	-8132.84	-8102.28	-31.6312	1.07269
frame_1194_x0.77_y0.05_z1.5_angle180.0_tilt30.0_tazi90.0	0.77	0.05	1.5	180	30	90	-8132.84	-8102.28	-31.6312	1.07269
frame_1158_x0.77_y0.05_z1.5_angle0.0_tilt30.0_tazi90.0	0.77	0.05	1.5	0	30	90	-8132.84	-8102.28	-31.6312	1.07269
frame_0330_x0.23_y0.05_z1.5_angle180.0_tilt30.0_tazi90.0	0.23	0.05	1.5	180	30	90	-8132.84	-8102.28	-31.6312	1.07269
frame_0306_x0.23_y0.05_z1.5_angle60.0_tilt30.0_tazi90.0	0.23	0.05	1.5	60	30	90	-8132.84	-8102.28	-31.6312	1.07269
frame_1182_x0.77_y0.05_z1.5_angle120.0_tilt30.0_tazi90.0	0.77	0.05	1.5	120	30	90	-8132.84	-8102.28	-31.6312	1.07269
frame_1170_x0.77_y0.05_z1.5_angle60.0_tilt30.0_tazi90.0	0.77	0.05	1.5	60	30	90	-8132.84	-8102.28	-31.6312	1.07269
frame_1554_x0.95_y0.41_z1.5_angle60.0_tilt30.0_tazi90.0	0.95	0.41	1.5	60	30	90	-8132.83	-8102.28	-31.6312	1.0823
frame_0126_x0.05_y0.41_z1.5_angle120.0_tilt30.0_tazi90.0	0.05	0.41	1.5	120	30	90	-8132.83	-8102.28	-31.6312	1.0823
frame_0114_x0.05_y0.41_z1.5_angle60.0_tilt30.0_tazi90.0	0.05	0.41	1.5	60	30	90	-8132.83	-8102.28	-31.6312	1.0823
frame_1542_x0.95_y0.41_z1.5_angle0.0_tilt30.0_tazi90.0	0.95	0.41	1.5	0	30	90	-8132.83	-8102.28	-31.6312	1.08231
frame_0102_x0.05_y0.41_z1.5_angle0.0_tilt30.0_tazi90.0	0.05	0.41	1.5	0	30	90	-8132.83	-8102.28	-31.6312	1.08231
frame_0138_x0.05_y0.41_z1.5_angle180.0_tilt30.0_tazi90.0	0.05	0.41	1.5	180	30	90	-8132.83	-8102.28	-31.6312	1.08231
frame_1566_x0.95_y0.41_z1.5_angle120.0_tilt30.0_tazi90.0	0.95	0.41	1.5	120	30	90	-8132.83	-8102.28	-31.6312	1.08232
frame_1578_x0.95_y0.41_z1.5_angle180.0_tilt30.0_tazi90.0	0.95	0.41	1.5	180	30	90	-8132.83	-8102.28	-31.6312	1.08232
frame_0235_x0.05_y0.77_z1.5_angle180.0_tilt30.0_tazi180.0	0.05	0.77	1.5	180	30	180	-8132.83	-8102.28	-31.6312	1.08419
frame_1661_x0.95_y0.77_z1.5_angle120.0_tilt30.0_tazi0.0	0.95	0.77	1.5	120	30	0	-8132.83	-8102.28	-31.6312	1.0842
frame_1637_x0.95_y0.77_z1.5_angle0.0_tilt30.0_tazi0.0	0.95	0.77	1.5	0	30	0	-8132.83	-8102.28	-31.6312	1.0842
frame_0199_x0.05_y0.77_z1.5_angle0.0_tilt30.0_tazi180.0	0.05	0.77	1.5	0	30	180	-8132.83	-8102.28	-31.6312	1.0842
frame_1649_x0.95_y0.77_z1.5_angle60.0_tilt30.0_tazi0.0	0.95	0.77	1.5	60	30	0	-8132.83	-8102.28	-31.6312	1.0842
frame_1673_x0.95_y0.77_z1.5_angle180.0_tilt30.0_tazi0.0	0.95	0.77	1.5	180	30	0	-8132.83	-8102.28	-31.6312	1.0842
frame_0211_x0.05_y0.77_z1.5_angle60.0_tilt30.0_tazi180.0	0.05	0.77	1.5	60	30	180	-8132.83	-8102.28	-31.6312	1.0842
frame_0223_x0.05_y0.77_z1.5_angle120.0_tilt30.0_tazi180.0	0.05	0.77	1.5	120	30	180	-8132.83	-8102.28	-31.6312	1.0842
frame_0438_x0.23_y0.59_z1.5_angle0.0_tilt30.0_tazi90.0	0.23	0.59	1.5	0	30	90	-8132.79	-8102.28	-31.6312	1.11729
frame_1326_x0.77_y0.59_z1.5_angle120.0_tilt30.0_tazi90.0	0.77	0.59	1.5	120	30	90	-8132.79	-8102.28	-31.6312	1.11729
frame_1338_x0.77_y0.59_z1.5_angle180.0_tilt30.0_tazi90.0	0.77	0.59	1.5	180	30	90	-8132.79	-8102.28	-31.6312	1.11729
frame_1314_x0.77_y0.59_z1.5_angle60.0_tilt30.0_tazi90.0	0.77	0.59	1.5	60	30	90	-8132.79	-8102.28	-31.6312	1.11729
frame_1302_x0.77_y0.59_z1.5_angle0.0_tilt30.0_tazi90.0	0.77	0.59	1.5	0	30	90	-8132.79	-8102.28	-31.6312	1.11729
frame_0462_x0.23_y0.59_z1.5_angle120.0_tilt30.0_tazi90.0	0.23	0.59	1.5	120	30	90	-8132.79	-8102.28	-31.6312	1.11729
frame_0450_x0.23_y0.59_z1.5_angle60.0_tilt30.0_tazi90.0	0.23	0.59	1.5	60	30	90	-8132.79	-8102.28	-31.6312	1.11729
frame_0474_x0.23_y0.59_z1.5_angle180.0_tilt30.0_tazi90.0	0.23	0.59	1.5	180	30	90	-8132.79	-8102.28	-31.6312	1.11729
frame_0167_x0.05_y0.59_z1.5_angle60.0_tilt60.0_tazi180.0	0.05	0.59	1.5	60	60	180	-8132.76	-8102.28	-31.6312	1.15357
frame_0179_x0.05_y0.59_z1.5_angle120.0_tilt60.0_tazi180.0	0.05	0.59	1.5	120	60	180	-8132.76	-8102.28	-31.6312	1.15357
frame_1605_x0.95_y0.59_z1.5_angle60.0_tilt60.0_tazi0.0	0.95	0.59	1.5	60	60	0	-8132.76	-8102.28	-31.6312	1.15357
frame_1593_x0.95_y0.59_z1.5_angle0.0_tilt60.0_tazi0.0	0.95	0.59	1.5	0	60	0	-8132.76	-8102.28	-31.6312	1.15357
frame_0191_x0.05_y0.59_z1.5_angle180.0_tilt60.0_tazi180.0	0.05	0.59	1.5	180	60	180	-8132.76	-8102.28	-31.6312	1.15357
frame_1617_x0.95_y0.59_z1.5_angle120.0_tilt60.0_tazi0.0	0.95	0.59	1.5	120	60	0	-8132.76	-8102.28	-31.6312	1.15357
frame_0155_x0.05_y0.59_z1.5_angle0.0_tilt60.0_tazi180.0	0.05	0.59	1.5	0	60	180	-8132.76	-8102.28	-31.6312	1.15357
frame_1629_x0.95_y0.59_z1.5_angle180.0_tilt60.0_tazi0.0	0.95	0.59	1.5	180	60	0	-8132.76	-8102.28	-31.6312	1.15357
frame_1420_x0.77_y0.95_z1.5_angle120.0_tilt0.0_tazi270.0	0.77	0.95	1.5	120	0	270	-8132.75	-8102.28	-31.6312	1.15609
frame_1408_x0.77_y0.95_z1.5_angle60.0_tilt0.0_tazi270.0	0.77	0.95	1.5	60	0	270	-8132.75	-8102.28	-31.6312	1.15609
frame_0543_x0.23_y0.95_z1.5_angle60.0_tilt0.0_tazi180.0	0.23	0.95	1.5	60	0	180	-8132.75	-8102.28	-31.6312	1.15609
frame_0556_x0.23_y0.95_z1.5_angle120.0_tilt0.0_tazi270.0	0.23	0.95	1.5	120	0	270	-8132.75	-8102.28	-31.6312	1.15609
frame_1406_x0.77_y0.95_z1.5_angle60.0_tilt0.0_tazi90.0	0.77	0.95	1.5	60	0	90	-8132.75	-8102.28	-31.6312	1.15609
frame_0566_x0.23_y0.95_z1.5_angle180.0_tilt0.0_tazi90.0	0.23	0.95	1.5	180	0	90	-8132.75	-8102.28	-31.6312	1.15609
frame_1395_x0.77_y0.95_z1.5_angle0.0_tilt0.0_tazi180.0	0.77	0.95	1.5	0	0	180	-8132.75	-8102.28	-31.6312	1.15609
frame_1430_x0.77_y0.95_z1.5_angle180.0_tilt0.0_tazi90.0	0.77	0.95	1.5	180	0	90	-8132.75	-8102.28	-31.6312	1.15609
frame_1419_x0.77_y0.95_z1.5_angle120.0_tilt0.0_tazi180.0	0.77	0.95	1.5	120	0	180	-8132.75	-8102.28	-31.6312	1.15609
frame_1407_x0.77_y0.95_z1.5_angle60.0_tilt0.0_tazi180.0	0.77	0.95	1.5	60	0	180	-8132.75	-8102.28	-31.6312	1.15609
frame_1393_x0.77_y0.95_z1.5_angle0.0_tilt0.0_tazi0.0	0.77	0.95	1.5	0	0	0	-8132.75	-8102.28	-31.6312	1.15609
frame_0567_x0.23_y0.95_z1.5_angle180.0_tilt0.0_tazi180.0	0.23	0.95	1.5	180	0	180	-8132.75	-8102.28	-31.6312	1.15609
frame_0568_x0.23_y0.95_z1.5_angle180.0_tilt0.0_tazi270.0	0.23	0.95	1.5	180	0	270	-8132.75	-8102.28	-31.6312	1.15609
frame_1429_x0.77_y0.95_z1.5_angle180.0_tilt0.0_tazi0.0	0.77	0.95	1.5	180	0	0	-8132.75	-8102.28	-31.6312	1.15609
frame_1396_x0.77_y0.95_z1.5_angle0.0_tilt0.0_tazi270.0	0.77	0.95	1.5	0	0	270	-8132.75	-8102.28	-31.6312	1.15609
frame_1431_x0.77_y0.95_z1.5_angle180.0_tilt0.0_tazi180.0	0.77	0.95	1.5	180	0	180	-8132.75	-8102.28	-31.6312	1.15609
frame_0529_x0.23_y0.95_z1.5_angle0.0_tilt0.0_tazi0.0	0.23	0.95	1.5	0	0	0	-8132.75	-8102.28	-31.6312	1.15609
frame_0541_x0.23_y0.95_z1.5_angle60.0_tilt0.0_tazi0.0	0.23	0.95	1.5	60	0	0	-8132.75	-8102.28	-31.6312	1.15609
frame_0542_x0.23_y0.95_z1.5_angle60.0_tilt0.0_tazi90.0	0.23	0.95	1.5	60	0	90	-8132.75	-8102.28	-31.6312	1.15609
frame_1418_x0.77_y0.95_z1.5_angle120.0_tilt0.0_tazi90.0	0.77	0.95	1.5	120	0	90	-8132.75	-8102.28	-31.6312	1.15609
frame_0544_x0.23_y0.95_z1.5_angle60.0_tilt0.0_tazi270.0	0.23	0.95	1.5	60	0	270	-8132.75	-8102.28	-31.6312	1.15609
frame_0532_x0.23_y0.95_z1.5_angle0.0_tilt0.0_tazi270.0	0.23	0.95	1.5	0	0	270	-8132.75	-8102.28	-31.6312	1.15609
frame_0554_x0.23_y0.95_z1.5_angle120.0_tilt0.0_tazi90.0	0.23	0.95	1.5	120	0	90	-8132.75	-8102.28	-31.6312	1.15609
frame_0553_x0.23_y0.95_z1.5_angle120.0_tilt0.0_tazi0.0	0.23	0.95	1.5	120	0	0	-8132.75	-8102.28	-31.6312	1.15609
frame_0531_x0.23_y0.95_z1.5_angle0.0_tilt0.0_tazi180.0	0.23	0.95	1.5	0	0	180	-8132.75	-8102.28	-31.6312	1.15609
frame_1405_x0.77_y0.95_z1.5_angle60.0_tilt0.0_tazi0.0	0.77	0.95	1.5	60	0	0	-8132.75	-8102.28	-31.6312	1.15609
frame_1432_x0.77_y0.95_z1.5_angle180.0_tilt0.0_tazi270.0	0.77	0.95	1.5	180	0	270	-8132.75	-8102.28	-31.6312	1.15609
frame_1394_x0.77_y0.95_z1.5_angle0.0_tilt0.0_tazi90.0	0.77	0.95	1.5	0	0	90	-8132.75	-8102.28	-31.6312	1.15609
frame_0565_x0.23_y0.95_z1.5_angle180.0_tilt0.0_tazi0.0	0.23	0.95	1.5	180	0	0	-8132.75	-8102.28	-31.6312	1.15609
frame_0555_x0.23_y0.95_z1.5_angle120.0_tilt0.0_tazi180.0	0.23	0.95	1.5	120	0	180	-8132.75	-8102.28	-31.6312	1.15609
frame_1417_x0.77_y0.95_z1.5_angle120.0_tilt0.0_tazi0.0	0.77	0.95	1.5	120	0	0	-8132.75	-8102.28	-31.6312	1.15609
frame_0530_x0.23_y0.95_z1.5_angle0.0_tilt0.0_tazi90.0	0.23	0.95	1.5	0	0	90	-8132.75	-8102.28	-31.6312	1.15609
frame_0598_x0.41_y0.05_z1.5_angle60.0_tilt60.0_tazi90.0	0.41	0.05	1.5	60	60	90	-8132.74	-8102.28	-31.6312	1.16526
frame_0622_x0.41_y0.05_z1.5_angle180.0_tilt60.0_tazi90.0	0.41	0.05	1.5	180	60	90	-8132.74	-8102.28	-31.6312	1.16526
frame_0898_x0.59_y0.05_z1.5_angle120.0_tilt60.0_tazi90.0	0.59	0.05	1.5	120	60	90	-8132.74	-8102.28	-31.6312	1.16526
frame_0886_x0.59_y0.05_z1.5_angle60.0_tilt60.0_tazi90.0	0.59	0.05	1.5	60	60	90	-8132.74	-8102.28	-31.6312	1.16526
frame_0874_x0.59_y0.05_z1.5_angle0.0_tilt60.0_tazi90.0	0.59	0.05	1.5	0	60	90	-8132.74	-8102.28	-31.6312	1.16526
frame_0610_x0.41_y0.05_z1.5_angle120.0_tilt60.0_tazi90.0	0.41	0.05	1.5	120	60	90	-8132.74	-8102.28	-31.6312	1.16526
frame_0910_x0.59_y0.05_z1.5_angle180.0_tilt60.0_tazi90.0	0.59	0.05	1.5	180	60	90	-8132.74	-8102.28	-31.6312	1.16526
frame_0586_x0.41_y0.05_z1.5_angle0.0_tilt60.0_tazi90.0	0.41	0.05	1.5	0	60	90	-8132.74	-8102.28	-31.6312	1.16526
frame_0143_x0.05_y0.41_z1.5_angle180.0_tilt60.0_tazi180.0	0.05	0.41	1.5	180	60	180	-8132.74	-8102.28	-31.6312	1.17273
frame_0119_x0.05_y0.41_z1.5_angle60.0_tilt60.0_tazi180.0	0.05	0.41	1.5	60	60	180	-8132.74	-8102.28	-31.6312	1.17273
frame_1557_x0.95_y0.41_z1.5_angle60.0_tilt60.0_tazi0.0	0.95	0.41	1.5	60	60	0	-8132.74	-8102.28	-31.6312	1.17273
frame_1581_x0.95_y0.41_z1.5_angle180.0_tilt60.0_tazi0.0	0.95	0.41	1.5	180	60	0	-8132.74	-8102.28	-31.6312	1.17273
frame_1545_x0.95_y0.41_z1.5_angle0.0_tilt60.0_tazi0.0	0.95	0.41	1.5	0	60	0	-8132.74	-8102.28	-31.6312	1.17273
frame_1569_x0.95_y0.41_z1.5_angle120.0_tilt60.0_tazi0.0	0.95	0.41	1.5	120	60	0	-8132.74	-8102.28	-31.6312	1.17273
frame_0107_x0.05_y0.41_z1.5_angle0.0_tilt60.0_tazi180.0	0.05	0.41	1.5	0	60	180	-8132.74	-8102.28	-31.6312	1.17273
frame_0131_x0.05_y0.41_z1.5_angle120.0_tilt60.0_tazi180.0	0.05	0.41	1.5	120	60	180	-8132.74	-8102.28	-31.6312	1.17274
frame_1309_x0.77_y0.59_z1.5_angle60.0_tilt0.0_tazi0.0	0.77	0.59	1.5	60	0	0	-8132.74	-8102.28	-31.6312	1.17357
frame_0469_x0.23_y0.59_z1.5_angle180.0_tilt0.0_tazi0.0	0.23	0.59	1.5	180	0	0	-8132.74	-8102.28	-31.6312	1.17357
frame_1297_x0.77_y0.59_z1.5_angle0.0_tilt0.0_tazi0.0	0.77	0.59	1.5	0	0	0	-8132.74	-8102.28	-31.6312	1.17357
frame_0460_x0.23_y0.59_z1.5_angle120.0_tilt0.0_tazi270.0	0.23	0.59	1.5	120	0	270	-8132.74	-8102.28	-31.6312	1.17357
frame_0436_x0.23_y0.59_z1.5_angle0.0_tilt0.0_tazi270.0	0.23	0.59	1.5	0	0	270	-8132.74	-8102.28	-31.6312	1.17357
frame_0458_x0.23_y0.59_z1.5_angle120.0_tilt0.0_tazi90.0	0.23	0.59	1.5	120	0	90	-8132.74	-8102.28	-31.6312	1.17357
frame_0445_x0.23_y0.59_z1.5_angle60.0_tilt0.0_tazi0.0	0.23	0.59	1.5	60	0	0	-8132.74	-8102.28	-31.6312	1.17357
frame_0448_x0.23_y0.59_z1.5_angle60.0_tilt0.0_tazi270.0	0.23	0.59	1.5	60	0	270	-8132.74	-8102.28	-31.6312	1.17357
frame_1299_x0.77_y0.59_z1.5_angle0.0_tilt0.0_tazi180.0	0.77	0.59	1.5	0	0	180	-8132.74	-8102.28	-31.6312	1.17357
frame_1324_x0.77_y0.59_z1.5_angle120.0_tilt0.0_tazi270.0	0.77	0.59	1.5	120	0	270	-8132.74	-8102.28	-31.6312	1.17357
frame_0446_x0.23_y0.59_z1.5_angle60.0_tilt0.0_tazi90.0	0.23	0.59	1.5	60	0	90	-8132.74	-8102.28	-31.6312	1.17357
frame_1334_x0.77_y0.59_z1.5_angle180.0_tilt0.0_tazi90.0	0.77	0.59	1.5	180	0	90	-8132.74	-8102.28	-31.6312	1.17357
frame_0471_x0.23_y0.59_z1.5_angle180.0_tilt0.0_tazi180.0	0.23	0.59	1.5	180	0	180	-8132.74	-8102.28	-31.6312	1.17357
frame_1323_x0.77_y0.59_z1.5_angle120.0_tilt0.0_tazi180.0	0.77	0.59	1.5	120	0	180	-8132.74	-8102.28	-31.6312	1.17357
frame_0433_x0.23_y0.59_z1.5_angle0.0_tilt0.0_tazi0.0	0.23	0.59	1.5	0	0	0	-8132.74	-8102.28	-31.6312	1.17357
frame_1310_x0.77_y0.59_z1.5_angle60.0_tilt0.0_tazi90.0	0.77	0.59	1.5	60	0	90	-8132.74	-8102.28	-31.6312	1.17357
frame_0447_x0.23_y0.59_z1.5_angle60.0_tilt0.0_tazi180.0	0.23	0.59	1.5	60	0	180	-8132.74	-8102.28	-31.6312	1.17357
frame_1333_x0.77_y0.59_z1.5_angle180.0_tilt0.0_tazi0.0	0.77	0.59	1.5	180	0	0	-8132.74	-8102.28	-31.6312	1.17357
frame_1336_x0.77_y0.59_z1.5_angle180.0_tilt0.0_tazi270.0	0.77	0.59	1.5	180	0	270	-8132.74	-8102.28	-31.6312	1.17357
frame_0470_x0.23_y0.59_z1.5_angle180.0_tilt0.0_tazi90.0	0.23	0.59	1.5	180	0	90	-8132.74	-8102.28	-31.6312	1.17358
frame_0457_x0.23_y0.59_z1.5_angle120.0_tilt0.0_tazi0.0	0.23	0.59	1.5	120	0	0	-8132.74	-8102.28	-31.6312	1.17358
frame_1335_x0.77_y0.59_z1.5_angle180.0_tilt0.0_tazi180.0	0.77	0.59	1.5	180	0	180	-8132.74	-8102.28	-31.6312	1.17358
frame_0434_x0.23_y0.59_z1.5_angle0.0_tilt0.0_tazi90.0	0.23	0.59	1.5	0	0	90	-8132.74	-8102.28	-31.6312	1.17358
frame_1298_x0.77_y0.59_z1.5_angle0.0_tilt0.0_tazi90.0	0.77	0.59	1.5	0	0	90	-8132.74	-8102.28	-31.6312	1.17358
frame_1322_x0.77_y0.59_z1.5_angle120.0_tilt0.0_tazi90.0	0.77	0.59	1.5	120	0	90	-8132.74	-8102.28	-31.6312	1.17358
frame_1311_x0.77_y0.59_z1.5_angle60.0_tilt0.0_tazi180.0	0.77	0.59	1.5	60	0	180	-8132.74	-8102.28	-31.6312	1.17358
frame_0435_x0.23_y0.59_z1.5_angle0.0_tilt0.0_tazi180.0	0.23	0.59	1.5	0	0	180	-8132.74	-8102.28	-31.6312	1.17358
frame_0459_x0.23_y0.59_z1.5_angle120.0_tilt0.0_tazi180.0	0.23	0.59	1.5	120	0	180	-8132.74	-8102.28	-31.6312	1.17358
frame_1312_x0.77_y0.59_z1.5_angle60.0_tilt0.0_tazi270.0	0.77	0.59	1.5	60	0	270	-8132.74	-8102.28	-31.6312	1.17358
frame_1300_x0.77_y0.59_z1.5_angle0.0_tilt0.0_tazi270.0	0.77	0.59	1.5	0	0	270	-8132.74	-8102.28	-31.6312	1.17358
frame_0472_x0.23_y0.59_z1.5_angle180.0_tilt0.0_tazi270.0	0.23	0.59	1.5	180	0	270	-8132.74	-8102.28	-31.6312	1.17358
frame_1321_x0.77_y0.59_z1.5_angle120.0_tilt0.0_tazi0.0	0.77	0.59	1.5	120	0	0	-8132.74	-8102.28	-31.6312	1.17358
frame_1577_x0.95_y0.41_z1.5_angle180.0_tilt30.0_tazi0.0	0.95	0.41	1.5	180	30	0	-8132.73	-8102.28	-31.6312	1.18283
frame_1553_x0.95_y0.41_z1.5_angle60.0_tilt30.0_tazi0.0	0.95	0.41	1.5	60	30	0	-8132.73	-8102.28	-31.6312	1.18283
frame_0115_x0.05_y0.41_z1.5_angle60.0_tilt30.0_tazi180.0	0.05	0.41	1.5	60	30	180	-8132.73	-8102.28	-31.6312	1.18283
frame_1565_x0.95_y0.41_z1.5_angle120.0_tilt30.0_tazi0.0	0.95	0.41	1.5	120	30	0	-8132.73	-8102.28	-31.6312	1.18283
frame_0127_x0.05_y0.41_z1.5_angle120.0_tilt30.0_tazi180.0	0.05	0.41	1.5	120	30	180	-8132.73	-8102.28	-31.6312	1.18283
frame_0139_x0.05_y0.41_z1.5_angle180.0_tilt30.0_tazi180.0	0.05	0.41	1.5	180	30	180	-8132.73	-8102.28	-31.6312	1.18283
frame_0103_x0.05_y0.41_z1.5_angle0.0_tilt30.0_tazi180.0	0.05	0.41	1.5	0	30	180	-8132.73	-8102.28	-31.6312	1.18283
frame_1541_x0.95_y0.41_z1.5_angle0.0_tilt30.0_tazi0.0	0.95	0.41	1.5	0	30	0	-8132.73	-8102.28	-31.6312	1.18283
frame_0817_x0.41_y0.95_z1.5_angle0.0_tilt0.0_tazi0.0	0.41	0.95	1.5	0	0	0	-8132.73	-8102.28	-31.6312	1.18312
frame_1130_x0.59_y0.95_z1.5_angle120.0_tilt0.0_tazi90.0	0.59	0.95	1.5	120	0	90	-8132.73	-8102.28	-31.6312	1.18312
frame_1141_x0.59_y0.95_z1.5_angle180.0_tilt0.0_tazi0.0	0.59	0.95	1.5	180	0	0	-8132.73	-8102.28	-31.6312	1.18312
frame_1105_x0.59_y0.95_z1.5_angle0.0_tilt0.0_tazi0.0	0.59	0.95	1.5	0	0	0	-8132.73	-8102.28	-31.6312	1.18312
frame_0831_x0.41_y0.95_z1.5_angle60.0_tilt0.0_tazi180.0	0.41	0.95	1.5	60	0	180	-8132.73	-8102.28	-31.6312	1.18312
frame_1107_x0.59_y0.95_z1.5_angle0.0_tilt0.0_tazi180.0	0.59	0.95	1.5	0	0	180	-8132.73	-8102.28	-31.6312	1.18312
frame_1118_x0.59_y0.95_z1.5_angle60.0_tilt0.0_tazi90.0	0.59	0.95	1.5	60	0	90	-8132.73	-8102.28	-31.6312	1.18312
frame_1143_x0.59_y0.95_z1.5_angle180.0_tilt0.0_tazi180.0	0.59	0.95	1.5	180	0	180	-8132.73	-8102.28	-31.6312	1.18312
frame_0841_x0.41_y0.95_z1.5_angle120.0_tilt0.0_tazi0.0	0.41	0.95	1.5	120	0	0	-8132.73	-8102.28	-31.6312	1.18312
frame_1119_x0.59_y0.95_z1.5_angle60.0_tilt0.0_tazi180.0	0.59	0.95	1.5	60	0	180	-8132.73	-8102.28	-31.6312	1.18312
frame_0843_x0.41_y0.95_z1.5_angle120.0_tilt0.0_tazi180.0	0.41	0.95	1.5	120	0	180	-8132.73	-8102.28	-31.6312	1.18312
frame_1131_x0.59_y0.95_z1.5_angle120.0_tilt0.0_tazi180.0	0.59	0.95	1.5	120	0	180	-8132.73	-8102.28	-31.6312	1.18312
frame_0854_x0.41_y0.95_z1.5_angle180.0_tilt0.0_tazi90.0	0.41	0.95	1.5	180	0	90	-8132.73	-8102.28	-31.6312	1.18312
frame_0832_x0.41_y0.95_z1.5_angle60.0_tilt0.0_tazi270.0	0.41	0.95	1.5	60	0	270	-8132.73	-8102.28	-31.6312	1.18312
frame_0829_x0.41_y0.95_z1.5_angle60.0_tilt0.0_tazi0.0	0.41	0.95	1.5	60	0	0	-8132.73	-8102.28	-31.6312	1.18312
frame_1129_x0.59_y0.95_z1.5_angle120.0_tilt0.0_tazi0.0	0.59	0.95	1.5	120	0	0	-8132.73	-8102.28	-31.6312	1.18312
frame_0830_x0.41_y0.95_z1.5_angle60.0_tilt0.0_tazi90.0	0.41	0.95	1.5	60	0	90	-8132.73	-8102.28	-31.6312	1.18312
frame_1117_x0.59_y0.95_z1.5_angle60.0_tilt0.0_tazi0.0	0.59	0.95	1.5	60	0	0	-8132.73	-8102.28	-31.6312	1.18312
frame_0818_x0.41_y0.95_z1.5_angle0.0_tilt0.0_tazi90.0	0.41	0.95	1.5	0	0	90	-8132.73	-8102.28	-31.6312	1.18312
frame_0844_x0.41_y0.95_z1.5_angle120.0_tilt0.0_tazi270.0	0.41	0.95	1.5	120	0	270	-8132.73	-8102.28	-31.6312	1.18312
frame_1144_x0.59_y0.95_z1.5_angle180.0_tilt0.0_tazi270.0	0.59	0.95	1.5	180	0	270	-8132.73	-8102.28	-31.6312	1.18312
frame_0819_x0.41_y0.95_z1.5_angle0.0_tilt0.0_tazi180.0	0.41	0.95	1.5	0	0	180	-8132.73	-8102.28	-31.6312	1.18312
frame_1120_x0.59_y0.95_z1.5_angle60.0_tilt0.0_tazi270.0	0.59	0.95	1.5	60	0	270	-8132.73	-8102.28	-31.6312	1.18312
frame_1108_x0.59_y0.95_z1.5_angle0.0_tilt0.0_tazi270.0	0.59	0.95	1.5	0	0	270	-8132.73	-8102.28	-31.6312	1.18312
frame_0820_x0.41_y0.95_z1.5_angle0.0_tilt0.0_tazi270.0	0.41	0.95	1.5	0	0	270	-8132.73	-8102.28	-31.6312	1.18312
frame_1142_x0.59_y0.95_z1.5_angle180.0_tilt0.0_tazi90.0	0.59	0.95	1.5	180	0	90	-8132.73	-8102.28	-31.6312	1.18313
frame_0853_x0.41_y0.95_z1.5_angle180.0_tilt0.0_tazi0.0	0.41	0.95	1.5	180	0	0	-8132.73	-8102.28	-31.6312	1.18313
frame_1132_x0.59_y0.95_z1.5_angle120.0_tilt0.0_tazi270.0	0.59	0.95	1.5	120	0	270	-8132.73	-8102.28	-31.6312	1.18313
frame_0842_x0.41_y0.95_z1.5_angle120.0_tilt0.0_tazi90.0	0.41	0.95	1.5	120	0	90	-8132.73	-8102.28	-31.6312	1.18313
frame_0855_x0.41_y0.95_z1.5_angle180.0_tilt0.0_tazi180.0	0.41	0.95	1.5	180	0	180	-8132.73	-8102.28	-31.6312	1.18313
frame_0856_x0.41_y0.95_z1.5_angle180.0_tilt0.0_tazi270.0	0.41	0.95	1.5	180	0	270	-8132.73	-8102.28	-31.6312	1.18313
frame_1106_x0.59_y0.95_z1.5_angle0.0_tilt0.0_tazi90.0	0.59	0.95	1.5	0	0	90	-8132.73	-8102.28	-31.6312	1.18313
frame_1438_x0.77_y0.95_z1.5_angle180.0_tilt60.0_tazi90.0	0.77	0.95	1.5	180	60	90	-8132.71	-8102.28	-31.6312	1.19523
frame_1426_x0.77_y0.95_z1.5_angle120.0_tilt60.0_tazi90.0	0.77	0.95	1.5	120	60	90	-8132.71	-8102.28	-31.6312	1.19523
frame_0538_x0.23_y0.95_z1.5_angle0.0_tilt60.0_tazi90.0	0.23	0.95	1.5	0	60	90	-8132.71	-8102.28	-31.6312	1.19523
frame_1402_x0.77_y0.95_z1.5_angle0.0_tilt60.0_tazi90.0	0.77	0.95	1.5	0	60	90	-8132.71	-8102.28	-31.6312	1.19523
frame_0562_x0.23_y0.95_z1.5_angle120.0_tilt60.0_tazi90.0	0.23	0.95	1.5	120	60	90	-8132.71	-8102.28	-31.6312	1.19523
frame_0574_x0.23_y0.95_z1.5_angle180.0_tilt60.0_tazi90.0	0.23	0.95	1.5	180	60	90	-8132.71	-8102.28	-31.6312	1.19523
frame_0550_x0.23_y0.95_z1.5_angle60.0_tilt60.0_tazi90.0	0.23	0.95	1.5	60	60	90	-8132.71	-8102.28	-31.6312	1.19523
frame_1414_x0.77_y0.95_z1.5_angle60.0_tilt60.0_tazi90.0	0.77	0.95	1.5	60	60	90	-8132.71	-8102.28	-31.6312	1.19523
frame_1339_x0.77_y0.59_z1.5_angle180.0_tilt30.0_tazi180.0	0.77	0.59	1.5	180	30	180	-8132.7	-8102.28	-31.6312	1.21188
frame_0449_x0.23_y0.59_z1.5_angle60.0_tilt30.0_tazi0.0	0.23	0.59	1.5	60	30	0	-8132.7	-8102.28	-31.6312	1.21188
frame_0461_x0.23_y0.59_z1.5_angle120.0_tilt30.0_tazi0.0	0.23	0.59	1.5	120	30	0	-8132.7	-8102.28	-31.6312	1.21188
frame_0437_x0.23_y0.59_z1.5_angle0.0_tilt30.0_tazi0.0	0.23	0.59	1.5	0	30	0	-8132.7	-8102.28	-31.6312	1.21188
frame_1315_x0.77_y0.59_z1.5_angle60.0_tilt30.0_tazi180.0	0.77	0.59	1.5	60	30	180	-8132.7	-8102.28	-31.6312	1.21188
frame_1327_x0.77_y0.59_z1.5_angle120.0_tilt30.0_tazi180.0	0.77	0.59	1.5	120	30	180	-8132.7	-8102.28	-31.6312	1.21188
frame_0473_x0.23_y0.59_z1.5_angle180.0_tilt30.0_tazi0.0	0.23	0.59	1.5	180	30	0	-8132.7	-8102.28	-31.6312	1.21188
frame_1303_x0.77_y0.59_z1.5_angle0.0_tilt30.0_tazi180.0	0.77	0.59	1.5	0	30	180	-8132.7	-8102.28	-31.6312	1.21189
frame_0632_x0.41_y0.23_z1.5_angle0.0_tilt30.0_tazi270.0	0.41	0.23	1.5	0	30	270	-8132.67	-8102.28	-31.6312	1.23573
frame_0668_x0.41_y0.23_z1.5_angle180.0_tilt30.0_tazi270.0	0.41	0.23	1.5	180	30	270	-8132.67	-8102.28	-31.6312	1.23574
frame_0956_x0.59_y0.23_z1.5_angle180.0_tilt30.0_tazi270.0	0.59	0.23	1.5	180	30	270	-8132.67	-8102.28	-31.6312	1.23574
frame_0932_x0.59_y0.23_z1.5_angle60.0_tilt30.0_tazi270.0	0.59	0.23	1.5	60	30	270	-8132.67	-8102.28	-31.6312	1.23574
frame_0644_x0.41_y0.23_z1.5_angle60.0_tilt30.0_tazi270.0	0.41	0.23	1.5	60	30	270	-8132.67	-8102.28	-31.6312	1.23574
frame_0920_x0.59_y0.23_z1.5_angle0.0_tilt30.0_tazi270.0	0.59	0.23	1.5	0	30	270	-8132.67	-8102.28	-31.6312	1.23574
frame_0656_x0.41_y0.23_z1.5_angle120.0_tilt30.0_tazi270.0	0.41	0.23	1.5	120	30	270	-8132.67	-8102.28	-31.6312	1.23574
frame_0944_x0.59_y0.23_z1.5_angle120.0_tilt30.0_tazi270.0	0.59	0.23	1.5	120	30	270	-8132.67	-8102.28	-31.6312	1.23574
frame_0826_x0.41_y0.95_z1.5_angle0.0_tilt60.0_tazi90.0	0.41	0.95	1.5	0	60	90	-8132.66	-8102.28	-31.6312	1.25064
frame_1114_x0.59_y0.95_z1.5_angle0.0_tilt60.0_tazi90.0	0.59	0.95	1.5	0	60	90	-8132.66	-8102.28	-31.6312	1.25064
frame_1126_x0.59_y0.95_z1.5_angle60.0_tilt60.0_tazi90.0	0.59	0.95	1.5	60	60	90	-8132.66	-8102.28	-31.6312	1.25064
frame_0850_x0.41_y0.95_z1.5_angle120.0_tilt60.0_tazi90.0	0.41	0.95	1.5	120	60	90	-8132.66	-8102.28	-31.6312	1.25064
frame_1138_x0.59_y0.95_z1.5_angle120.0_tilt60.0_tazi90.0	0.59	0.95	1.5	120	60	90	-8132.66	-8102.28	-31.6312	1.25064
frame_0862_x0.41_y0.95_z1.5_angle180.0_tilt60.0_tazi90.0	0.41	0.95	1.5	180	60	90	-8132.66	-8102.28	-31.6312	1.25064
frame_1150_x0.59_y0.95_z1.5_angle180.0_tilt60.0_tazi90.0	0.59	0.95	1.5	180	60	90	-8132.66	-8102.28	-31.6312	1.25064
frame_0838_x0.41_y0.95_z1.5_angle60.0_tilt60.0_tazi90.0	0.41	0.95	1.5	60	60	90	-8132.66	-8102.28	-31.6312	1.25064
frame_0153_x0.05_y0.59_z1.5_angle0.0_tilt60.0_tazi0.0	0.05	0.59	1.5	0	60	0	-8132.65	-8102.28	-31.6312	1.25812
frame_1619_x0.95_y0.59_z1.5_angle120.0_tilt60.0_tazi180.0	0.95	0.59	1.5	120	60	180	-8132.65	-8102.28	-31.6312	1.25812
frame_0165_x0.05_y0.59_z1.5_angle60.0_tilt60.0_tazi0.0	0.05	0.59	1.5	60	60	0	-8132.65	-8102.28	-31.6312	1.25812
frame_0177_x0.05_y0.59_z1.5_angle120.0_tilt60.0_tazi0.0	0.05	0.59	1.5	120	60	0	-8132.65	-8102.28	-31.6312	1.25812
frame_0189_x0.05_y0.59_z1.5_angle180.0_tilt60.0_tazi0.0	0.05	0.59	1.5	180	60	0	-8132.65	-8102.28	-31.6312	1.25812
frame_1607_x0.95_y0.59_z1.5_angle60.0_tilt60.0_tazi180.0	0.95	0.59	1.5	60	60	180	-8132.65	-8102.28	-31.6312	1.25812
frame_1595_x0.95_y0.59_z1.5_angle0.0_tilt60.0_tazi180.0	0.95	0.59	1.5	0	60	180	-8132.65	-8102.28	-31.6312	1.25812
frame_1631_x0.95_y0.59_z1.5_angle180.0_tilt60.0_tazi180.0	0.95	0.59	1.5	180	60	180	-8132.65	-8102.28	-31.6312	1.25813
frame_0911_x0.59_y0.05_z1.5_angle180.0_tilt60.0_tazi180.0	0.59	0.05	1.5	180	60	180	-8132.65	-8102.28	-31.6312	1.26004
frame_0887_x0.59_y0.05_z1.5_angle60.0_tilt60.0_tazi180.0	0.59	0.05	1.5	60	60	180	-8132.65	-8102.28	-31.6312	1.26004
frame_0621_x0.41_y0.05_z1.5_angle180.0_tilt60.0_tazi0.0	0.41	0.05	1.5	180	60	0	-8132.65	-8102.28	-31.6312	1.26004
frame_0899_x0.59_y0.05_z1.5_angle120.0_tilt60.0_tazi180.0	0.59	0.05	1.5	120	60	180	-8132.65	-8102.28	-31.6312	1.26004
frame_0597_x0.41_y0.05_z1.5_angle60.0_tilt60.0_tazi0.0	0.41	0.05	1.5	60	60	0	-8132.65	-8102.28	-31.6312	1.26004
frame_0585_x0.41_y0.05_z1.5_angle0.0_tilt60.0_tazi0.0	0.41	0.05	1.5	0	60	0	-8132.65	-8102.28	-31.6312	1.26004
frame_0609_x0.41_y0.05_z1.5_angle120.0_tilt60.0_tazi0.0	0.41	0.05	1.5	120	60	0	-8132.65	-8102.28	-31.6312	1.26004
frame_0875_x0.59_y0.05_z1.5_angle0.0_tilt60.0_tazi180.0	0.59	0.05	1.5	0	60	180	-8132.65	-8102.28	-31.6312	1.26004
frame_0876_x0.59_y0.05_z1.5_angle0.0_tilt60.0_tazi270.0	0.59	0.05	1.5	0	60	270	-8132.64	-8102.28	-31.6312	1.27397
frame_0600_x0.41_y0.05_z1.5_angle60.0_tilt60.0_tazi270.0	0.41	0.05	1.5	60	60	270	-8132.64	-8102.28	-31.6312	1.27397
frame_0588_x0.41_y0.05_z1.5_angle0.0_tilt60.0_tazi270.0	0.41	0.05	1.5	0	60	270	-8132.64	-8102.28	-31.6312	1.27397
frame_0912_x0.59_y0.05_z1.5_angle180.0_tilt60.0_tazi270.0	0.59	0.05	1.5	180	60	270	-8132.64	-8102.28	-31.6312	1.27397
frame_0624_x0.41_y0.05_z1.5_angle180.0_tilt60.0_tazi270.0	0.41	0.05	1.5	180	60	270	-8132.64	-8102.28	-31.6312	1.27397
frame_0900_x0.59_y0.05_z1.5_angle120.0_tilt60.0_tazi270.0	0.59	0.05	1.5	120	60	270	-8132.64	-8102.28	-31.6312	1.27397
frame_0888_x0.59_y0.05_z1.5_angle60.0_tilt60.0_tazi270.0	0.59	0.05	1.5	60	60	270	-8132.64	-8102.28	-31.6312	1.27397
frame_0612_x0.41_y0.05_z1.5_angle120.0_tilt60.0_tazi270.0	0.41	0.05	1.5	120	60	270	-8132.64	-8102.28	-31.6312	1.27397
frame_0825_x0.41_y0.95_z1.5_angle0.0_tilt60.0_tazi0.0	0.41	0.95	1.5	0	60	0	-8132.62	-8102.28	-31.6312	1.28901
frame_0849_x0.41_y0.95_z1.5_angle120.0_tilt60.0_tazi0.0	0.41	0.95	1.5	120	60	0	-8132.62	-8102.28	-31.6312	1.28901
frame_1127_x0.59_y0.95_z1.5_angle60.0_tilt60.0_tazi180.0	0.59	0.95	1.5	60	60	180	-8132.62	-8102.28	-31.6312	1.28902
frame_0837_x0.41_y0.95_z1.5_angle60.0_tilt60.0_tazi0.0	0.41	0.95	1.5	60	60	0	-8132.62	-8102.28	-31.6312	1.28902
frame_1151_x0.59_y0.95_z1.5_angle180.0_tilt60.0_tazi180.0	0.59	0.95	1.5	180	60	180	-8132.62	-8102.28	-31.6312	1.28902
frame_1139_x0.59_y0.95_z1.5_angle120.0_tilt60.0_tazi180.0	0.59	0.95	1.5	120	60	180	-8132.62	-8102.28	-31.6312	1.28902
frame_0861_x0.41_y0.95_z1.5_angle180.0_tilt60.0_tazi0.0	0.41	0.95	1.5	180	60	0	-8132.62	-8102.28	-31.6312	1.28902
frame_1115_x0.59_y0.95_z1.5_angle0.0_tilt60.0_tazi180.0	0.59	0.95	1.5	0	60	180	-8132.62	-8102.28	-31.6312	1.28902
frame_0834_x0.41_y0.95_z1.5_angle60.0_tilt30.0_tazi90.0	0.41	0.95	1.5	60	30	90	-8132.6	-8102.28	-31.6312	1.30564
frame_1146_x0.59_y0.95_z1.5_angle180.0_tilt30.0_tazi90.0	0.59	0.95	1.5	180	30	90	-8132.6	-8102.28	-31.6312	1.30564
frame_0858_x0.41_y0.95_z1.5_angle180.0_tilt30.0_tazi90.0	0.41	0.95	1.5	180	30	90	-8132.6	-8102.28	-31.6312	1.30564
frame_1134_x0.59_y0.95_z1.5_angle120.0_tilt30.0_tazi90.0	0.59	0.95	1.5	120	30	90	-8132.6	-8102.28	-31.6312	1.30564
frame_1122_x0.59_y0.95_z1.5_angle60.0_tilt30.0_tazi90.0	0.59	0.95	1.5	60	30	90	-8132.6	-8102.28	-31.6312	1.30565
frame_0846_x0.41_y0.95_z1.5_angle120.0_tilt30.0_tazi90.0	0.41	0.95	1.5	120	30	90	-8132.6	-8102.28	-31.6312	1.30565
frame_0822_x0.41_y0.95_z1.5_angle0.0_tilt30.0_tazi90.0	0.41	0.95	1.5	0	30	90	-8132.6	-8102.28	-31.6312	1.30565
frame_1110_x0.59_y0.95_z1.5_angle0.0_tilt30.0_tazi90.0	0.59	0.95	1.5	0	30	90	-8132.6	-8102.28	-31.6312	1.30565
frame_1281_x0.77_y0.41_z1.5_angle120.0_tilt60.0_tazi0.0	0.77	0.41	1.5	120	60	0	-8132.59	-8102.28	-31.6312	1.31872
frame_0395_x0.23_y0.41_z1.5_angle0.0_tilt60.0_tazi180.0	0.23	0.41	1.5	0	60	180	-8132.59	-8102.28	-31.6312	1.31872
frame_1293_x0.77_y0.41_z1.5_angle180.0_tilt60.0_tazi0.0	0.77	0.41	1.5	180	60	0	-8132.59	-8102.28	-31.6312	1.31872
frame_1269_x0.77_y0.41_z1.5_angle60.0_tilt60.0_tazi0.0	0.77	0.41	1.5	60	60	0	-8132.59	-8102.28	-31.6312	1.31872
frame_0419_x0.23_y0.41_z1.5_angle120.0_tilt60.0_tazi180.0	0.23	0.41	1.5	120	60	180	-8132.59	-8102.28	-31.6312	1.31872
frame_1257_x0.77_y0.41_z1.5_angle0.0_tilt60.0_tazi0.0	0.77	0.41	1.5	0	60	0	-8132.59	-8102.28	-31.6312	1.31872
frame_0407_x0.23_y0.41_z1.5_angle60.0_tilt60.0_tazi180.0	0.23	0.41	1.5	60	60	180	-8132.59	-8102.28	-31.6312	1.31872
frame_0431_x0.23_y0.41_z1.5_angle180.0_tilt60.0_tazi180.0	0.23	0.41	1.5	180	60	180	-8132.59	-8102.28	-31.6312	1.31872
frame_0719_x0.41_y0.41_z1.5_angle180.0_tilt60.0_tazi180.0	0.41	0.41	1.5	180	60	180	-8132.59	-8102.28	-31.6312	1.32126
frame_0695_x0.41_y0.41_z1.5_angle60.0_tilt60.0_tazi180.0	0.41	0.41	1.5	60	60	180	-8132.59	-8102.28	-31.6312	1.32126
frame_0683_x0.41_y0.41_z1.5_angle0.0_tilt60.0_tazi180.0	0.41	0.41	1.5	0	60	180	-8132.59	-8102.28	-31.6312	1.32126
frame_0993_x0.59_y0.41_z1.5_angle120.0_tilt60.0_tazi0.0	0.59	0.41	1.5	120	60	0	-8132.59	-8102.28	-31.6312	1.32126
frame_0981_x0.59_y0.41_z1.5_angle60.0_tilt60.0_tazi0.0	0.59	0.41	1.5	60	60	0	-8132.59	-8102.28	-31.6312	1.32126
frame_1005_x0.59_y0.41_z1.5_angle180.0_tilt60.0_tazi0.0	0.59	0.41	1.5	180	60	0	-8132.59	-8102.28	-31.6312	1.32126
frame_0707_x0.41_y0.41_z1.5_angle120.0_tilt60.0_tazi180.0	0.41	0.41	1.5	120	60	180	-8132.59	-8102.28	-31.6312	1.32126
frame_0969_x0.59_y0.41_z1.5_angle0.0_tilt60.0_tazi0.0	0.59	0.41	1.5	0	60	0	-8132.59	-8102.28	-31.6312	1.32126
frame_1147_x0.59_y0.95_z1.5_angle180.0_tilt30.0_tazi180.0	0.59	0.95	1.5	180	30	180	-8132.56	-8102.28	-31.6312	1.35432
frame_0821_x0.41_y0.95_z1.5_angle0.0_tilt30.0_tazi0.0	0.41	0.95	1.5	0	30	0	-8132.56	-8102.28	-31.6312	1.35432
frame_0833_x0.41_y0.95_z1.5_angle60.0_tilt30.0_tazi0.0	0.41	0.95	1.5	60	30	0	-8132.56	-8102.28	-31.6312	1.35432
frame_1123_x0.59_y0.95_z1.5_angle60.0_tilt30.0_tazi180.0	0.59	0.95	1.5	60	30	180	-8132.56	-8102.28	-31.6312	1.35432
frame_0845_x0.41_y0.95_z1.5_angle120.0_tilt30.0_tazi0.0	0.41	0.95	1.5	120	30	0	-8132.56	-8102.28	-31.6312	1.35433
frame_1111_x0.59_y0.95_z1.5_angle0.0_tilt30.0_tazi180.0	0.59	0.95	1.5	0	30	180	-8132.56	-8102.28	-31.6312	1.35433
frame_1135_x0.59_y0.95_z1.5_angle120.0_tilt30.0_tazi180.0	0.59	0.95	1.5	120	30	180	-8132.56	-8102.28	-31.6312	1.35433
frame_0857_x0.41_y0.95_z1.5_angle180.0_tilt30.0_tazi0.0	0.41	0.95	1.5	180	30	0	-8132.56	-8102.28	-31.6312	1.35433
frame_0909_x0.59_y0.05_z1.5_angle180.0_tilt60.0_tazi0.0	0.59	0.05	1.5	180	60	0	-8132.54	-8102.28	-31.6312	1.36582
frame_0873_x0.59_y0.05_z1.5_angle0.0_tilt60.0_tazi0.0	0.59	0.05	1.5	0	60	0	-8132.54	-8102.28	-31.6312	1.36582
frame_0587_x0.41_y0.05_z1.5_angle0.0_tilt60.0_tazi180.0	0.41	0.05	1.5	0	60	180	-8132.54	-8102.28	-31.6312	1.36582
frame_0897_x0.59_y0.05_z1.5_angle120.0_tilt60.0_tazi0.0	0.59	0.05	1.5	120	60	0	-8132.54	-8102.28	-31.6312	1.36582
frame_0885_x0.59_y0.05_z1.5_angle60.0_tilt60.0_tazi0.0	0.59	0.05	1.5	60	60	0	-8132.54	-8102.28	-31.6312	1.36582
frame_0623_x0.41_y0.05_z1.5_angle180.0_tilt60.0_tazi180.0	0.41	0.05	1.5	180	60	180	-8132.54	-8102.28	-31.6312	1.36582
frame_0611_x0.41_y0.05_z1.5_angle120.0_tilt60.0_tazi180.0	0.41	0.05	1.5	120	60	180	-8132.54	-8102.28	-31.6312	1.36582
frame_0599_x0.41_y0.05_z1.5_angle60.0_tilt60.0_tazi180.0	0.41	0.05	1.5	60	60	180	-8132.54	-8102.28	-31.6312	1.36582
frame_1264_x0.77_y0.41_z1.5_angle60.0_tilt0.0_tazi270.0	0.77	0.41	1.5	60	0	270	-8132.51	-8102.28	-31.6312	1.40278
frame_0409_x0.23_y0.41_z1.5_angle120.0_tilt0.0_tazi0.0	0.23	0.41	1.5	120	0	0	-8132.51	-8102.28	-31.6312	1.40278
frame_1274_x0.77_y0.41_z1.5_angle120.0_tilt0.0_tazi90.0	0.77	0.41	1.5	120	0	90	-8132.51	-8102.28	-31.6312	1.40278
frame_0399_x0.23_y0.41_z1.5_angle60.0_tilt0.0_tazi180.0	0.23	0.41	1.5	60	0	180	-8132.51	-8102.28	-31.6312	1.40278
frame_0411_x0.23_y0.41_z1.5_angle120.0_tilt0.0_tazi180.0	0.23	0.41	1.5	120	0	180	-8132.51	-8102.28	-31.6312	1.40278
frame_1251_x0.77_y0.41_z1.5_angle0.0_tilt0.0_tazi180.0	0.77	0.41	1.5	0	0	180	-8132.51	-8102.28	-31.6312	1.40278
frame_0398_x0.23_y0.41_z1.5_angle60.0_tilt0.0_tazi90.0	0.23	0.41	1.5	60	0	90	-8132.51	-8102.28	-31.6312	1.40278
frame_0423_x0.23_y0.41_z1.5_angle180.0_tilt0.0_tazi180.0	0.23	0.41	1.5	180	0	180	-8132.51	-8102.28	-31.6312	1.40278
frame_0422_x0.23_y0.41_z1.5_angle180.0_tilt0.0_tazi90.0	0.23	0.41	1.5	180	0	90	-8132.51	-8102.28	-31.6312	1.40278
frame_1286_x0.77_y0.41_z1.5_angle180.0_tilt0.0_tazi90.0	0.77	0.41	1.5	180	0	90	-8132.51	-8102.28	-31.6312	1.40278
frame_1249_x0.77_y0.41_z1.5_angle0.0_tilt0.0_tazi0.0	0.77	0.41	1.5	0	0	0	-8132.51	-8102.28	-31.6312	1.40278
frame_0400_x0.23_y0.41_z1.5_angle60.0_tilt0.0_tazi270.0	0.23	0.41	1.5	60	0	270	-8132.51	-8102.28	-31.6312	1.40278
frame_1273_x0.77_y0.41_z1.5_angle120.0_tilt0.0_tazi0.0	0.77	0.41	1.5	120	0	0	-8132.51	-8102.28	-31.6312	1.40278
frame_0421_x0.23_y0.41_z1.5_angle180.0_tilt0.0_tazi0.0	0.23	0.41	1.5	180	0	0	-8132.51	-8102.28	-31.6312	1.40278
frame_1261_x0.77_y0.41_z1.5_angle60.0_tilt0.0_tazi0.0	0.77	0.41	1.5	60	0	0	-8132.51	-8102.28	-31.6312	1.40278
frame_0387_x0.23_y0.41_z1.5_angle0.0_tilt0.0_tazi180.0	0.23	0.41	1.5	0	0	180	-8132.51	-8102.28	-31.6312	1.40278
frame_1276_x0.77_y0.41_z1.5_angle120.0_tilt0.0_tazi270.0	0.77	0.41	1.5	120	0	270	-8132.51	-8102.28	-31.6312	1.40278
frame_0388_x0.23_y0.41_z1.5_angle0.0_tilt0.0_tazi270.0	0.23	0.41	1.5	0	0	270	-8132.51	-8102.28	-31.6312	1.40278
frame_1275_x0.77_y0.41_z1.5_angle120.0_tilt0.0_tazi180.0	0.77	0.41	1.5	120	0	180	-8132.51	-8102.28	-31.6312	1.40279
frame_1263_x0.77_y0.41_z1.5_angle60.0_tilt0.0_tazi180.0	0.77	0.41	1.5	60	0	180	-8132.51	-8102.28	-31.6312	1.40279
frame_1262_x0.77_y0.41_z1.5_angle60.0_tilt0.0_tazi90.0	0.77	0.41	1.5	60	0	90	-8132.51	-8102.28	-31.6312	1.40279
frame_1250_x0.77_y0.41_z1.5_angle0.0_tilt0.0_tazi90.0	0.77	0.41	1.5	0	0	90	-8132.51	-8102.28	-31.6312	1.40279
frame_0412_x0.23_y0.41_z1.5_angle120.0_tilt0.0_tazi270.0	0.23	0.41	1.5	120	0	270	-8132.51	-8102.28	-31.6312	1.40279
frame_0386_x0.23_y0.41_z1.5_angle0.0_tilt0.0_tazi90.0	0.23	0.41	1.5	0	0	90	-8132.51	-8102.28	-31.6312	1.40279
frame_0397_x0.23_y0.41_z1.5_angle60.0_tilt0.0_tazi0.0	0.23	0.41	1.5	60	0	0	-8132.51	-8102.28	-31.6312	1.40279
frame_1285_x0.77_y0.41_z1.5_angle180.0_tilt0.0_tazi0.0	0.77	0.41	1.5	180	0	0	-8132.51	-8102.28	-31.6312	1.40279
frame_1287_x0.77_y0.41_z1.5_angle180.0_tilt0.0_tazi180.0	0.77	0.41	1.5	180	0	180	-8132.51	-8102.28	-31.6312	1.40279
frame_0410_x0.23_y0.41_z1.5_angle120.0_tilt0.0_tazi90.0	0.23	0.41	1.5	120	0	90	-8132.51	-8102.28	-31.6312	1.40279
frame_0385_x0.23_y0.41_z1.5_angle0.0_tilt0.0_tazi0.0	0.23	0.41	1.5	0	0	0	-8132.51	-8102.28	-31.6312	1.40279
frame_0424_x0.23_y0.41_z1.5_angle180.0_tilt0.0_tazi270.0	0.23	0.41	1.5	180	0	270	-8132.51	-8102.28	-31.6312	1.40279
frame_1288_x0.77_y0.41_z1.5_angle180.0_tilt0.0_tazi270.0	0.77	0.41	1.5	180	0	270	-8132.51	-8102.28	-31.6312	1.40279
frame_1252_x0.77_y0.41_z1.5_angle0.0_tilt0.0_tazi270.0	0.77	0.41	1.5	0	0	270	-8132.51	-8102.28	-31.6312	1.40279
frame_1423_x0.77_y0.95_z1.5_angle120.0_tilt30.0_tazi180.0	0.77	0.95	1.5	120	30	180	-8132.49	-8102.28	-31.6312	1.42072
frame_0557_x0.23_y0.95_z1.5_angle120.0_tilt30.0_tazi0.0	0.23	0.95	1.5	120	30	0	-8132.49	-8102.28	-31.6312	1.42072
frame_1399_x0.77_y0.95_z1.5_angle0.0_tilt30.0_tazi180.0	0.77	0.95	1.5	0	30	180	-8132.49	-8102.28	-31.6312	1.42072
frame_0533_x0.23_y0.95_z1.5_angle0.0_tilt30.0_tazi0.0	0.23	0.95	1.5	0	30	0	-8132.49	-8102.28	-31.6312	1.42072
frame_1435_x0.77_y0.95_z1.5_angle180.0_tilt30.0_tazi180.0	0.77	0.95	1.5	180	30	180	-8132.49	-8102.28	-31.6312	1.42073
frame_1411_x0.77_y0.95_z1.5_angle60.0_tilt30.0_tazi180.0	0.77	0.95	1.5	60	30	180	-8132.49	-8102.28	-31.6312	1.42073
frame_0545_x0.23_y0.95_z1.5_angle60.0_tilt30.0_tazi0.0	0.23	0.95	1.5	60	30	0	-8132.49	-8102.28	-31.6312	1.42073
frame_0569_x0.23_y0.95_z1.5_angle180.0_tilt30.0_tazi0.0	0.23	0.95	1.5	180	30	0	-8132.49	-8102.28	-31.6312	1.42073
frame_1711_x0.95_y0.95_z1.5_angle120.0_tilt30.0_tazi180.0	0.95	0.95	1.5	120	30	180	-8132.48	-8102.28	-31.6312	1.42774
frame_0269_x0.05_y0.95_z1.5_angle120.0_tilt30.0_tazi0.0	0.05	0.95	1.5	120	30	0	-8132.48	-8102.28	-31.6312	1.42774
frame_1699_x0.95_y0.95_z1.5_angle60.0_tilt30.0_tazi180.0	0.95	0.95	1.5	60	30	180	-8132.48	-8102.28	-31.6312	1.42774
frame_1723_x0.95_y0.95_z1.5_angle180.0_tilt30.0_tazi180.0	0.95	0.95	1.5	180	30	180	-8132.48	-8102.28	-31.6312	1.42774
frame_0257_x0.05_y0.95_z1.5_angle60.0_tilt30.0_tazi0.0	0.05	0.95	1.5	60	30	0	-8132.48	-8102.28	-31.6312	1.42774
frame_1687_x0.95_y0.95_z1.5_angle0.0_tilt30.0_tazi180.0	0.95	0.95	1.5	0	30	180	-8132.48	-8102.28	-31.6312	1.42774
frame_0245_x0.05_y0.95_z1.5_angle0.0_tilt30.0_tazi0.0	0.05	0.95	1.5	0	30	0	-8132.48	-8102.28	-31.6312	1.42774
frame_0281_x0.05_y0.95_z1.5_angle180.0_tilt30.0_tazi0.0	0.05	0.95	1.5	180	30	0	-8132.48	-8102.28	-31.6312	1.42774
frame_0164_x0.05_y0.59_z1.5_angle60.0_tilt30.0_tazi270.0	0.05	0.59	1.5	60	30	270	-8132.44	-8102.28	-31.6312	1.47139
frame_1616_x0.95_y0.59_z1.5_angle120.0_tilt30.0_tazi270.0	0.95	0.59	1.5	120	30	270	-8132.44	-8102.28	-31.6312	1.47139
frame_1592_x0.95_y0.59_z1.5_angle0.0_tilt30.0_tazi270.0	0.95	0.59	1.5	0	30	270	-8132.44	-8102.28	-31.6312	1.47139
frame_0176_x0.05_y0.59_z1.5_angle120.0_tilt30.0_tazi270.0	0.05	0.59	1.5	120	30	270	-8132.44	-8102.28	-31.6312	1.47139
frame_0188_x0.05_y0.59_z1.5_angle180.0_tilt30.0_tazi270.0	0.05	0.59	1.5	180	30	270	-8132.44	-8102.28	-31.6312	1.4714
frame_1604_x0.95_y0.59_z1.5_angle60.0_tilt30.0_tazi270.0	0.95	0.59	1.5	60	30	270	-8132.44	-8102.28	-31.6312	1.4714
frame_0152_x0.05_y0.59_z1.5_angle0.0_tilt30.0_tazi270.0	0.05	0.59	1.5	0	30	270	-8132.44	-8102.28	-31.6312	1.4714
frame_1628_x0.95_y0.59_z1.5_angle180.0_tilt30.0_tazi270.0	0.95	0.59	1.5	180	30	270	-8132.44	-8102.28	-31.6312	1.4714
frame_1651_x0.95_y0.77_z1.5_angle60.0_tilt30.0_tazi180.0	0.95	0.77	1.5	60	30	180	-8132.43	-8102.28	-31.6312	1.47601
frame_0233_x0.05_y0.77_z1.5_angle180.0_tilt30.0_tazi0.0	0.05	0.77	1.5	180	30	0	-8132.43	-8102.28	-31.6312	1.47601
frame_1639_x0.95_y0.77_z1.5_angle0.0_tilt30.0_tazi180.0	0.95	0.77	1.5	0	30	180	-8132.43	-8102.28	-31.6312	1.47601
frame_1675_x0.95_y0.77_z1.5_angle180.0_tilt30.0_tazi180.0	0.95	0.77	1.5	180	30	180	-8132.43	-8102.28	-31.6312	1.47601
frame_1663_x0.95_y0.77_z1.5_angle120.0_tilt30.0_tazi180.0	0.95	0.77	1.5	120	30	180	-8132.43	-8102.28	-31.6312	1.47601
frame_0209_x0.05_y0.77_z1.5_angle60.0_tilt30.0_tazi0.0	0.05	0.77	1.5	60	30	0	-8132.43	-8102.28	-31.6312	1.47601
frame_0197_x0.05_y0.77_z1.5_angle0.0_tilt30.0_tazi0.0	0.05	0.77	1.5	0	30	0	-8132.43	-8102.28	-31.6312	1.47603
frame_0221_x0.05_y0.77_z1.5_angle120.0_tilt30.0_tazi0.0	0.05	0.77	1.5	120	30	0	-8132.43	-8102.28	-31.6312	1.47603
frame_1601_x0.95_y0.59_z1.5_angle60.0_tilt30.0_tazi0.0	0.95	0.59	1.5	60	30	0	-8132.42	-8102.28	-31.6312	1.49258
frame_0187_x0.05_y0.59_z1.5_angle180.0_tilt30.0_tazi180.0	0.05	0.59	1.5	180	30	180	-8132.42	-8102.28	-31.6312	1.49258
frame_0151_x0.05_y0.59_z1.5_angle0.0_tilt30.0_tazi180.0	0.05	0.59	1.5	0	30	180	-8132.42	-8102.28	-31.6312	1.49258
frame_1625_x0.95_y0.59_z1.5_angle180.0_tilt30.0_tazi0.0	0.95	0.59	1.5	180	30	0	-8132.42	-8102.28	-31.6312	1.49258
frame_1613_x0.95_y0.59_z1.5_angle120.0_tilt30.0_tazi0.0	0.95	0.59	1.5	120	30	0	-8132.42	-8102.28	-31.6312	1.49259
frame_0175_x0.05_y0.59_z1.5_angle120.0_tilt30.0_tazi180.0	0.05	0.59	1.5	120	30	180	-8132.42	-8102.28	-31.6312	1.49259
frame_0163_x0.05_y0.59_z1.5_angle60.0_tilt30.0_tazi180.0	0.05	0.59	1.5	60	30	180	-8132.42	-8102.28	-31.6312	1.49259
frame_1589_x0.95_y0.59_z1.5_angle0.0_tilt30.0_tazi0.0	0.95	0.59	1.5	0	30	0	-8132.42	-8102.28	-31.6312	1.4926
frame_0228_x0.05_y0.77_z1.5_angle120.0_tilt60.0_tazi270.0	0.05	0.77	1.5	120	60	270	-8132.4	-8102.28	-31.6312	1.51244
frame_0240_x0.05_y0.77_z1.5_angle180.0_tilt60.0_tazi270.0	0.05	0.77	1.5	180	60	270	-8132.4	-8102.28	-31.6312	1.51244
frame_1668_x0.95_y0.77_z1.5_angle120.0_tilt60.0_tazi270.0	0.95	0.77	1.5	120	60	270	-8132.4	-8102.28	-31.6312	1.51244
frame_0204_x0.05_y0.77_z1.5_angle0.0_tilt60.0_tazi270.0	0.05	0.77	1.5	0	60	270	-8132.4	-8102.28	-31.6312	1.51244
frame_1644_x0.95_y0.77_z1.5_angle0.0_tilt60.0_tazi270.0	0.95	0.77	1.5	0	60	270	-8132.4	-8102.28	-31.6312	1.51244
frame_0216_x0.05_y0.77_z1.5_angle60.0_tilt60.0_tazi270.0	0.05	0.77	1.5	60	60	270	-8132.4	-8102.28	-31.6312	1.51244
frame_1680_x0.95_y0.77_z1.5_angle180.0_tilt60.0_tazi270.0	0.95	0.77	1.5	180	60	270	-8132.4	-8102.28	-31.6312	1.51244
frame_1656_x0.95_y0.77_z1.5_angle60.0_tilt60.0_tazi270.0	0.95	0.77	1.5	60	60	270	-8132.4	-8102.28	-31.6312	1.51244
frame_1266_x0.77_y0.41_z1.5_angle60.0_tilt30.0_tazi90.0	0.77	0.41	1.5	60	30	90	-8132.38	-8102.28	-31.6312	1.5305
frame_1290_x0.77_y0.41_z1.5_angle180.0_tilt30.0_tazi90.0	0.77	0.41	1.5	180	30	90	-8132.38	-8102.28	-31.6312	1.5305
frame_1254_x0.77_y0.41_z1.5_angle0.0_tilt30.0_tazi90.0	0.77	0.41	1.5	0	30	90	-8132.38	-8102.28	-31.6312	1.5305
frame_0426_x0.23_y0.41_z1.5_angle180.0_tilt30.0_tazi90.0	0.23	0.41	1.5	180	30	90	-8132.38	-8102.28	-31.6312	1.5305
frame_1278_x0.77_y0.41_z1.5_angle120.0_tilt30.0_tazi90.0	0.77	0.41	1.5	120	30	90	-8132.38	-8102.28	-31.6312	1.5305
frame_0390_x0.23_y0.41_z1.5_angle0.0_tilt30.0_tazi90.0	0.23	0.41	1.5	0	30	90	-8132.38	-8102.28	-31.6312	1.5305
frame_0414_x0.23_y0.41_z1.5_angle120.0_tilt30.0_tazi90.0	0.23	0.41	1.5	120	30	90	-8132.38	-8102.28	-31.6312	1.5305
frame_0402_x0.23_y0.41_z1.5_angle60.0_tilt30.0_tazi90.0	0.23	0.41	1.5	60	30	90	-8132.38	-8102.28	-31.6312	1.5305
frame_0692_x0.41_y0.41_z1.5_angle60.0_tilt30.0_tazi270.0	0.41	0.41	1.5	60	30	270	-8132.38	-8102.28	-31.6312	1.53109
frame_0992_x0.59_y0.41_z1.5_angle120.0_tilt30.0_tazi270.0	0.59	0.41	1.5	120	30	270	-8132.38	-8102.28	-31.6312	1.53109
frame_1004_x0.59_y0.41_z1.5_angle180.0_tilt30.0_tazi270.0	0.59	0.41	1.5	180	30	270	-8132.38	-8102.28	-31.6312	1.53109
frame_0968_x0.59_y0.41_z1.5_angle0.0_tilt30.0_tazi270.0	0.59	0.41	1.5	0	30	270	-8132.38	-8102.28	-31.6312	1.53109
frame_0704_x0.41_y0.41_z1.5_angle120.0_tilt30.0_tazi270.0	0.41	0.41	1.5	120	30	270	-8132.38	-8102.28	-31.6312	1.53109
frame_0980_x0.59_y0.41_z1.5_angle60.0_tilt30.0_tazi270.0	0.59	0.41	1.5	60	30	270	-8132.38	-8102.28	-31.6312	1.53109
frame_0716_x0.41_y0.41_z1.5_angle180.0_tilt30.0_tazi270.0	0.41	0.41	1.5	180	30	270	-8132.38	-8102.28	-31.6312	1.53109
frame_0680_x0.41_y0.41_z1.5_angle0.0_tilt30.0_tazi270.0	0.41	0.41	1.5	0	30	270	-8132.38	-8102.28	-31.6312	1.53109
frame_1398_x0.77_y0.95_z1.5_angle0.0_tilt30.0_tazi90.0	0.77	0.95	1.5	0	30	90	-8132.37	-8102.28	-31.6312	1.54017
frame_0546_x0.23_y0.95_z1.5_angle60.0_tilt30.0_tazi90.0	0.23	0.95	1.5	60	30	90	-8132.37	-8102.28	-31.6312	1.54017
frame_1422_x0.77_y0.95_z1.5_angle120.0_tilt30.0_tazi90.0	0.77	0.95	1.5	120	30	90	-8132.37	-8102.28	-31.6312	1.54017
frame_0558_x0.23_y0.95_z1.5_angle120.0_tilt30.0_tazi90.0	0.23	0.95	1.5	120	30	90	-8132.37	-8102.28	-31.6312	1.54017
frame_1434_x0.77_y0.95_z1.5_angle180.0_tilt30.0_tazi90.0	0.77	0.95	1.5	180	30	90	-8132.37	-8102.28	-31.6312	1.54017
frame_1410_x0.77_y0.95_z1.5_angle60.0_tilt30.0_tazi90.0	0.77	0.95	1.5	60	30	90	-8132.37	-8102.28	-31.6312	1.54017
frame_0570_x0.23_y0.95_z1.5_angle180.0_tilt30.0_tazi90.0	0.23	0.95	1.5	180	30	90	-8132.37	-8102.28	-31.6312	1.54017
frame_0534_x0.23_y0.95_z1.5_angle0.0_tilt30.0_tazi90.0	0.23	0.95	1.5	0	30	90	-8132.37	-8102.28	-31.6312	1.54017
frame_0582_x0.41_y0.05_z1.5_angle0.0_tilt30.0_tazi90.0	0.41	0.05	1.5	0	30	90	-8132.36	-8102.28	-31.6312	1.54563
frame_0882_x0.59_y0.05_z1.5_angle60.0_tilt30.0_tazi90.0	0.59	0.05	1.5	60	30	90	-8132.36	-8102.28	-31.6312	1.54563
frame_0906_x0.59_y0.05_z1.5_angle180.0_tilt30.0_tazi90.0	0.59	0.05	1.5	180	30	90	-8132.36	-8102.28	-31.6312	1.54563
frame_0894_x0.59_y0.05_z1.5_angle120.0_tilt30.0_tazi90.0	0.59	0.05	1.5	120	30	90	-8132.36	-8102.28	-31.6312	1.54563
frame_0606_x0.41_y0.05_z1.5_angle120.0_tilt30.0_tazi90.0	0.41	0.05	1.5	120	30	90	-8132.36	-8102.28	-31.6312	1.54563
frame_0594_x0.41_y0.05_z1.5_angle60.0_tilt30.0_tazi90.0	0.41	0.05	1.5	60	30	90	-8132.36	-8102.28	-31.6312	1.54563
frame_0618_x0.41_y0.05_z1.5_angle180.0_tilt30.0_tazi90.0	0.41	0.05	1.5	180	30	90	-8132.36	-8102.28	-31.6312	1.54563
frame_0870_x0.59_y0.05_z1.5_angle0.0_tilt30.0_tazi90.0	0.59	0.05	1.5	0	30	90	-8132.36	-8102.28	-31.6312	1.54563
frame_0581_x0.41_y0.05_z1.5_angle0.0_tilt30.0_tazi0.0	0.41	0.05	1.5	0	30	0	-8132.36	-8102.28	-31.6312	1.54944
frame_0617_x0.41_y0.05_z1.5_angle180.0_tilt30.0_tazi0.0	0.41	0.05	1.5	180	30	0	-8132.36	-8102.28	-31.6312	1.54944
frame_0907_x0.59_y0.05_z1.5_angle180.0_tilt30.0_tazi180.0	0.59	0.05	1.5	180	30	180	-8132.36	-8102.28	-31.6312	1.54944
frame_0593_x0.41_y0.05_z1.5_angle60.0_tilt30.0_tazi0.0	0.41	0.05	1.5	60	30	0	-8132.36	-8102.28	-31.6312	1.54944
frame_0871_x0.59_y0.05_z1.5_angle0.0_tilt30.0_tazi180.0	0.59	0.05	1.5	0	30	180	-8132.36	-8102.28	-31.6312	1.54944
frame_0605_x0.41_y0.05_z1.5_angle120.0_tilt30.0_tazi0.0	0.41	0.05	1.5	120	30	0	-8132.36	-8102.28	-31.6312	1.54944
frame_0895_x0.59_y0.05_z1.5_angle120.0_tilt30.0_tazi180.0	0.59	0.05	1.5	120	30	180	-8132.36	-8102.28	-31.6312	1.54944
frame_0883_x0.59_y0.05_z1.5_angle60.0_tilt30.0_tazi180.0	0.59	0.05	1.5	60	30	180	-8132.36	-8102.28	-31.6312	1.54945
frame_1626_x0.95_y0.59_z1.5_angle180.0_tilt30.0_tazi90.0	0.95	0.59	1.5	180	30	90	-8132.33	-8102.28	-31.6312	1.58174
frame_0150_x0.05_y0.59_z1.5_angle0.0_tilt30.0_tazi90.0	0.05	0.59	1.5	0	30	90	-8132.33	-8102.28	-31.6312	1.58174
frame_0174_x0.05_y0.59_z1.5_angle120.0_tilt30.0_tazi90.0	0.05	0.59	1.5	120	30	90	-8132.33	-8102.28	-31.6312	1.58174
frame_0162_x0.05_y0.59_z1.5_angle60.0_tilt30.0_tazi90.0	0.05	0.59	1.5	60	30	90	-8132.33	-8102.28	-31.6312	1.58174
frame_1602_x0.95_y0.59_z1.5_angle60.0_tilt30.0_tazi90.0	0.95	0.59	1.5	60	30	90	-8132.33	-8102.28	-31.6312	1.58174
frame_1614_x0.95_y0.59_z1.5_angle120.0_tilt30.0_tazi90.0	0.95	0.59	1.5	120	30	90	-8132.33	-8102.28	-31.6312	1.58174
frame_0186_x0.05_y0.59_z1.5_angle180.0_tilt30.0_tazi90.0	0.05	0.59	1.5	180	30	90	-8132.33	-8102.28	-31.6312	1.58174
frame_1590_x0.95_y0.59_z1.5_angle0.0_tilt30.0_tazi90.0	0.95	0.59	1.5	0	30	90	-8132.33	-8102.28	-31.6312	1.58174
frame_1615_x0.95_y0.59_z1.5_angle120.0_tilt30.0_tazi180.0	0.95	0.59	1.5	120	30	180	-8132.24	-8102.28	-31.6312	1.66687
frame_0149_x0.05_y0.59_z1.5_angle0.0_tilt30.0_tazi0.0	0.05	0.59	1.5	0	30	0	-8132.24	-8102.28	-31.6312	1.66688
frame_1591_x0.95_y0.59_z1.5_angle0.0_tilt30.0_tazi180.0	0.95	0.59	1.5	0	30	180	-8132.24	-8102.28	-31.6312	1.66688
frame_0173_x0.05_y0.59_z1.5_angle120.0_tilt30.0_tazi0.0	0.05	0.59	1.5	120	30	0	-8132.24	-8102.28	-31.6312	1.66688
frame_1627_x0.95_y0.59_z1.5_angle180.0_tilt30.0_tazi180.0	0.95	0.59	1.5	180	30	180	-8132.24	-8102.28	-31.6312	1.66688
frame_0185_x0.05_y0.59_z1.5_angle180.0_tilt30.0_tazi0.0	0.05	0.59	1.5	180	30	0	-8132.24	-8102.28	-31.6312	1.66688
frame_0161_x0.05_y0.59_z1.5_angle60.0_tilt30.0_tazi0.0	0.05	0.59	1.5	60	30	0	-8132.24	-8102.28	-31.6312	1.66688
frame_1603_x0.95_y0.59_z1.5_angle60.0_tilt30.0_tazi180.0	0.95	0.59	1.5	60	30	180	-8132.24	-8102.28	-31.6312	1.66688
frame_1702_x0.95_y0.95_z1.5_angle60.0_tilt60.0_tazi90.0	0.95	0.95	1.5	60	60	90	-8132.21	-8102.28	-31.6312	1.69741
frame_0250_x0.05_y0.95_z1.5_angle0.0_tilt60.0_tazi90.0	0.05	0.95	1.5	0	60	90	-8132.21	-8102.28	-31.6312	1.69741
frame_0286_x0.05_y0.95_z1.5_angle180.0_tilt60.0_tazi90.0	0.05	0.95	1.5	180	60	90	-8132.21	-8102.28	-31.6312	1.69741
frame_1690_x0.95_y0.95_z1.5_angle0.0_tilt60.0_tazi90.0	0.95	0.95	1.5	0	60	90	-8132.21	-8102.28	-31.6312	1.69741
frame_1726_x0.95_y0.95_z1.5_angle180.0_tilt60.0_tazi90.0	0.95	0.95	1.5	180	60	90	-8132.21	-8102.28	-31.6312	1.69741
frame_1714_x0.95_y0.95_z1.5_angle120.0_tilt60.0_tazi90.0	0.95	0.95	1.5	120	60	90	-8132.21	-8102.28	-31.6312	1.69741
frame_0262_x0.05_y0.95_z1.5_angle60.0_tilt60.0_tazi90.0	0.05	0.95	1.5	60	60	90	-8132.21	-8102.28	-31.6312	1.69741
frame_0274_x0.05_y0.95_z1.5_angle120.0_tilt60.0_tazi90.0	0.05	0.95	1.5	120	60	90	-8132.21	-8102.28	-31.6312	1.69741
frame_0584_x0.41_y0.05_z1.5_angle0.0_tilt30.0_tazi270.0	0.41	0.05	1.5	0	30	270	-8132.21	-8102.28	-31.6312	1.70409
frame_0896_x0.59_y0.05_z1.5_angle120.0_tilt30.0_tazi270.0	0.59	0.05	1.5	120	30	270	-8132.21	-8102.28	-31.6312	1.70409
frame_0608_x0.41_y0.05_z1.5_angle120.0_tilt30.0_tazi270.0	0.41	0.05	1.5	120	30	270	-8132.21	-8102.28	-31.6312	1.70409
frame_0908_x0.59_y0.05_z1.5_angle180.0_tilt30.0_tazi270.0	0.59	0.05	1.5	180	30	270	-8132.21	-8102.28	-31.6312	1.70409
frame_0596_x0.41_y0.05_z1.5_angle60.0_tilt30.0_tazi270.0	0.41	0.05	1.5	60	30	270	-8132.21	-8102.28	-31.6312	1.70409
frame_0872_x0.59_y0.05_z1.5_angle0.0_tilt30.0_tazi270.0	0.59	0.05	1.5	0	30	270	-8132.21	-8102.28	-31.6312	1.70409
frame_0620_x0.41_y0.05_z1.5_angle180.0_tilt30.0_tazi270.0	0.41	0.05	1.5	180	30	270	-8132.21	-8102.28	-31.6312	1.70409
frame_0884_x0.59_y0.05_z1.5_angle60.0_tilt30.0_tazi270.0	0.59	0.05	1.5	60	30	270	-8132.21	-8102.28	-31.6312	1.70409
frame_1695_x0.95_y0.95_z1.5_angle60.0_tilt0.0_tazi180.0	0.95	0.95	1.5	60	0	180	-8132.15	-8102.28	-31.6312	1.75896
frame_1707_x0.95_y0.95_z1.5_angle120.0_tilt0.0_tazi180.0	0.95	0.95	1.5	120	0	180	-8132.15	-8102.28	-31.6312	1.75896
frame_0267_x0.05_y0.95_z1.5_angle120.0_tilt0.0_tazi180.0	0.05	0.95	1.5	120	0	180	-8132.15	-8102.28	-31.6312	1.75896
frame_1696_x0.95_y0.95_z1.5_angle60.0_tilt0.0_tazi270.0	0.95	0.95	1.5	60	0	270	-8132.15	-8102.28	-31.6312	1.75896
frame_1718_x0.95_y0.95_z1.5_angle180.0_tilt0.0_tazi90.0	0.95	0.95	1.5	180	0	90	-8132.15	-8102.28	-31.6312	1.75896
frame_0244_x0.05_y0.95_z1.5_angle0.0_tilt0.0_tazi270.0	0.05	0.95	1.5	0	0	270	-8132.15	-8102.28	-31.6312	1.75896
frame_0243_x0.05_y0.95_z1.5_angle0.0_tilt0.0_tazi180.0	0.05	0.95	1.5	0	0	180	-8132.15	-8102.28	-31.6312	1.75896
frame_0266_x0.05_y0.95_z1.5_angle120.0_tilt0.0_tazi90.0	0.05	0.95	1.5	120	0	90	-8132.15	-8102.28	-31.6312	1.75896
frame_1681_x0.95_y0.95_z1.5_angle0.0_tilt0.0_tazi0.0	0.95	0.95	1.5	0	0	0	-8132.15	-8102.28	-31.6312	1.75896
frame_0278_x0.05_y0.95_z1.5_angle180.0_tilt0.0_tazi90.0	0.05	0.95	1.5	180	0	90	-8132.15	-8102.28	-31.6312	1.75896
frame_1693_x0.95_y0.95_z1.5_angle60.0_tilt0.0_tazi0.0	0.95	0.95	1.5	60	0	0	-8132.15	-8102.28	-31.6312	1.75896
frame_0253_x0.05_y0.95_z1.5_angle60.0_tilt0.0_tazi0.0	0.05	0.95	1.5	60	0	0	-8132.15	-8102.28	-31.6312	1.75896
frame_0242_x0.05_y0.95_z1.5_angle0.0_tilt0.0_tazi90.0	0.05	0.95	1.5	0	0	90	-8132.15	-8102.28	-31.6312	1.75896
frame_0277_x0.05_y0.95_z1.5_angle180.0_tilt0.0_tazi0.0	0.05	0.95	1.5	180	0	0	-8132.15	-8102.28	-31.6312	1.75896
frame_1694_x0.95_y0.95_z1.5_angle60.0_tilt0.0_tazi90.0	0.95	0.95	1.5	60	0	90	-8132.15	-8102.28	-31.6312	1.75896
frame_1719_x0.95_y0.95_z1.5_angle180.0_tilt0.0_tazi180.0	0.95	0.95	1.5	180	0	180	-8132.15	-8102.28	-31.6312	1.75896
frame_1720_x0.95_y0.95_z1.5_angle180.0_tilt0.0_tazi270.0	0.95	0.95	1.5	180	0	270	-8132.15	-8102.28	-31.6312	1.75896
frame_0255_x0.05_y0.95_z1.5_angle60.0_tilt0.0_tazi180.0	0.05	0.95	1.5	60	0	180	-8132.15	-8102.28	-31.6312	1.75896
frame_0256_x0.05_y0.95_z1.5_angle60.0_tilt0.0_tazi270.0	0.05	0.95	1.5	60	0	270	-8132.15	-8102.28	-31.6312	1.75896
frame_0241_x0.05_y0.95_z1.5_angle0.0_tilt0.0_tazi0.0	0.05	0.95	1.5	0	0	0	-8132.15	-8102.28	-31.6312	1.75896
frame_0265_x0.05_y0.95_z1.5_angle120.0_tilt0.0_tazi0.0	0.05	0.95	1.5	120	0	0	-8132.15	-8102.28	-31.6312	1.75896
frame_1684_x0.95_y0.95_z1.5_angle0.0_tilt0.0_tazi270.0	0.95	0.95	1.5	0	0	270	-8132.15	-8102.28	-31.6312	1.75896
frame_1682_x0.95_y0.95_z1.5_angle0.0_tilt0.0_tazi90.0	0.95	0.95	1.5	0	0	90	-8132.15	-8102.28	-31.6312	1.75896
frame_1708_x0.95_y0.95_z1.5_angle120.0_tilt0.0_tazi270.0	0.95	0.95	1.5	120	0	270	-8132.15	-8102.28	-31.6312	1.75896
frame_0268_x0.05_y0.95_z1.5_angle120.0_tilt0.0_tazi270.0	0.05	0.95	1.5	120	0	270	-8132.15	-8102.28	-31.6312	1.75896
frame_0279_x0.05_y0.95_z1.5_angle180.0_tilt0.0_tazi180.0	0.05	0.95	1.5	180	0	180	-8132.15	-8102.28	-31.6312	1.75896
frame_0280_x0.05_y0.95_z1.5_angle180.0_tilt0.0_tazi270.0	0.05	0.95	1.5	180	0	270	-8132.15	-8102.28	-31.6312	1.75896
frame_1705_x0.95_y0.95_z1.5_angle120.0_tilt0.0_tazi0.0	0.95	0.95	1.5	120	0	0	-8132.15	-8102.28	-31.6312	1.75896
frame_0254_x0.05_y0.95_z1.5_angle60.0_tilt0.0_tazi90.0	0.05	0.95	1.5	60	0	90	-8132.15	-8102.28	-31.6312	1.75896
frame_1683_x0.95_y0.95_z1.5_angle0.0_tilt0.0_tazi180.0	0.95	0.95	1.5	0	0	180	-8132.15	-8102.28	-31.6312	1.75896
frame_1717_x0.95_y0.95_z1.5_angle180.0_tilt0.0_tazi0.0	0.95	0.95	1.5	180	0	0	-8132.15	-8102.28	-31.6312	1.75897
frame_1706_x0.95_y0.95_z1.5_angle120.0_tilt0.0_tazi90.0	0.95	0.95	1.5	120	0	90	-8132.15	-8102.28	-31.6312	1.75897
frame_0619_x0.41_y0.05_z1.5_angle180.0_tilt30.0_tazi180.0	0.41	0.05	1.5	180	30	180	-8132.12	-8102.28	-31.6312	1.78638
frame_0869_x0.59_y0.05_z1.5_angle0.0_tilt30.0_tazi0.0	0.59	0.05	1.5	0	30	0	-8132.12	-8102.28	-31.6312	1.78638
frame_0905_x0.59_y0.05_z1.5_angle180.0_tilt30.0_tazi0.0	0.59	0.05	1.5	180	30	0	-8132.12	-8102.28	-31.6312	1.78638
frame_0595_x0.41_y0.05_z1.5_angle60.0_tilt30.0_tazi180.0	0.41	0.05	1.5	60	30	180	-8132.12	-8102.28	-31.6312	1.78638
frame_0607_x0.41_y0.05_z1.5_angle120.0_tilt30.0_tazi180.0	0.41	0.05	1.5	120	30	180	-8132.12	-8102.28	-31.6312	1.78639
frame_0881_x0.59_y0.05_z1.5_angle60.0_tilt30.0_tazi0.0	0.59	0.05	1.5	60	30	0	-8132.12	-8102.28	-31.6312	1.78639
frame_0893_x0.59_y0.05_z1.5_angle120.0_tilt30.0_tazi0.0	0.59	0.05	1.5	120	30	0	-8132.12	-8102.28	-31.6312	1.78639
frame_0583_x0.41_y0.05_z1.5_angle0.0_tilt30.0_tazi180.0	0.41	0.05	1.5	0	30	180	-8132.12	-8102.28	-31.6312	1.78639
frame_0713_x0.41_y0.41_z1.5_angle180.0_tilt30.0_tazi0.0	0.41	0.41	1.5	180	30	0	-8132.11	-8102.28	-31.6312	1.80038
frame_0689_x0.41_y0.41_z1.5_angle60.0_tilt30.0_tazi0.0	0.41	0.41	1.5	60	30	0	-8132.11	-8102.28	-31.6312	1.80038
frame_0677_x0.41_y0.41_z1.5_angle0.0_tilt30.0_tazi0.0	0.41	0.41	1.5	0	30	0	-8132.11	-8102.28	-31.6312	1.80038
frame_0991_x0.59_y0.41_z1.5_angle120.0_tilt30.0_tazi180.0	0.59	0.41	1.5	120	30	180	-8132.11	-8102.28	-31.6312	1.80038
frame_0979_x0.59_y0.41_z1.5_angle60.0_tilt30.0_tazi180.0	0.59	0.41	1.5	60	30	180	-8132.11	-8102.28	-31.6312	1.80038
frame_0967_x0.59_y0.41_z1.5_angle0.0_tilt30.0_tazi180.0	0.59	0.41	1.5	0	30	180	-8132.11	-8102.28	-31.6312	1.80038
frame_1003_x0.59_y0.41_z1.5_angle180.0_tilt30.0_tazi180.0	0.59	0.41	1.5	180	30	180	-8132.11	-8102.28	-31.6312	1.80038
frame_0701_x0.41_y0.41_z1.5_angle120.0_tilt30.0_tazi0.0	0.41	0.41	1.5	120	30	0	-8132.11	-8102.28	-31.6312	1.8004
frame_0718_x0.41_y0.41_z1.5_angle180.0_tilt60.0_tazi90.0	0.41	0.41	1.5	180	60	90	-8132.08	-8102.28	-31.6312	1.82685
frame_0970_x0.59_y0.41_z1.5_angle0.0_tilt60.0_tazi90.0	0.59	0.41	1.5	0	60	90	-8132.08	-8102.28	-31.6312	1.82685
frame_0994_x0.59_y0.41_z1.5_angle120.0_tilt60.0_tazi90.0	0.59	0.41	1.5	120	60	90	-8132.08	-8102.28	-31.6312	1.82685
frame_0982_x0.59_y0.41_z1.5_angle60.0_tilt60.0_tazi90.0	0.59	0.41	1.5	60	60	90	-8132.08	-8102.28	-31.6312	1.82685
frame_0706_x0.41_y0.41_z1.5_angle120.0_tilt60.0_tazi90.0	0.41	0.41	1.5	120	60	90	-8132.08	-8102.28	-31.6312	1.82686
frame_1006_x0.59_y0.41_z1.5_angle180.0_tilt60.0_tazi90.0	0.59	0.41	1.5	180	60	90	-8132.08	-8102.28	-31.6312	1.82686
frame_0682_x0.41_y0.41_z1.5_angle0.0_tilt60.0_tazi90.0	0.41	0.41	1.5	0	60	90	-8132.08	-8102.28	-31.6312	1.82686
frame_0694_x0.41_y0.41_z1.5_angle60.0_tilt60.0_tazi90.0	0.41	0.41	1.5	60	60	90	-8132.08	-8102.28	-31.6312	1.82686
frame_1672_x0.95_y0.77_z1.5_angle180.0_tilt0.0_tazi270.0	0.95	0.77	1.5	180	0	270	-8132.08	-8102.28	-31.6312	1.82761
frame_0206_x0.05_y0.77_z1.5_angle60.0_tilt0.0_tazi90.0	0.05	0.77	1.5	60	0	90	-8132.08	-8102.28	-31.6312	1.82761
frame_1633_x0.95_y0.77_z1.5_angle0.0_tilt0.0_tazi0.0	0.95	0.77	1.5	0	0	0	-8132.08	-8102.28	-31.6312	1.82761
frame_0232_x0.05_y0.77_z1.5_angle180.0_tilt0.0_tazi270.0	0.05	0.77	1.5	180	0	270	-8132.08	-8102.28	-31.6312	1.82761
frame_1635_x0.95_y0.77_z1.5_angle0.0_tilt0.0_tazi180.0	0.95	0.77	1.5	0	0	180	-8132.08	-8102.28	-31.6312	1.82762
frame_1657_x0.95_y0.77_z1.5_angle120.0_tilt0.0_tazi0.0	0.95	0.77	1.5	120	0	0	-8132.08	-8102.28	-31.6312	1.82762
frame_1671_x0.95_y0.77_z1.5_angle180.0_tilt0.0_tazi180.0	0.95	0.77	1.5	180	0	180	-8132.08	-8102.28	-31.6312	1.82762
frame_1660_x0.95_y0.77_z1.5_angle120.0_tilt0.0_tazi270.0	0.95	0.77	1.5	120	0	270	-8132.08	-8102.28	-31.6312	1.82762
frame_1646_x0.95_y0.77_z1.5_angle60.0_tilt0.0_tazi90.0	0.95	0.77	1.5	60	0	90	-8132.08	-8102.28	-31.6312	1.82762
frame_1648_x0.95_y0.77_z1.5_angle60.0_tilt0.0_tazi270.0	0.95	0.77	1.5	60	0	270	-8132.08	-8102.28	-31.6312	1.82762
frame_0194_x0.05_y0.77_z1.5_angle0.0_tilt0.0_tazi90.0	0.05	0.77	1.5	0	0	90	-8132.08	-8102.28	-31.6312	1.82762
frame_0217_x0.05_y0.77_z1.5_angle120.0_tilt0.0_tazi0.0	0.05	0.77	1.5	120	0	0	-8132.08	-8102.28	-31.6312	1.82762
frame_1634_x0.95_y0.77_z1.5_angle0.0_tilt0.0_tazi90.0	0.95	0.77	1.5	0	0	90	-8132.08	-8102.28	-31.6312	1.82762
frame_0207_x0.05_y0.77_z1.5_angle60.0_tilt0.0_tazi180.0	0.05	0.77	1.5	60	0	180	-8132.08	-8102.28	-31.6312	1.82762
frame_1670_x0.95_y0.77_z1.5_angle180.0_tilt0.0_tazi90.0	0.95	0.77	1.5	180	0	90	-8132.08	-8102.28	-31.6312	1.82762
frame_1636_x0.95_y0.77_z1.5_angle0.0_tilt0.0_tazi270.0	0.95	0.77	1.5	0	0	270	-8132.08	-8102.28	-31.6312	1.82762
frame_0230_x0.05_y0.77_z1.5_angle180.0_tilt0.0_tazi90.0	0.05	0.77	1.5	180	0	90	-8132.08	-8102.28	-31.6312	1.82762
frame_0219_x0.05_y0.77_z1.5_angle120.0_tilt0.0_tazi180.0	0.05	0.77	1.5	120	0	180	-8132.08	-8102.28	-31.6312	1.82762
frame_0220_x0.05_y0.77_z1.5_angle120.0_tilt0.0_tazi270.0	0.05	0.77	1.5	120	0	270	-8132.08	-8102.28	-31.6312	1.82762
frame_0218_x0.05_y0.77_z1.5_angle120.0_tilt0.0_tazi90.0	0.05	0.77	1.5	120	0	90	-8132.08	-8102.28	-31.6312	1.82762
frame_1658_x0.95_y0.77_z1.5_angle120.0_tilt0.0_tazi90.0	0.95	0.77	1.5	120	0	90	-8132.08	-8102.28	-31.6312	1.82762
frame_0208_x0.05_y0.77_z1.5_angle60.0_tilt0.0_tazi270.0	0.05	0.77	1.5	60	0	270	-8132.08	-8102.28	-31.6312	1.82762
frame_0196_x0.05_y0.77_z1.5_angle0.0_tilt0.0_tazi270.0	0.05	0.77	1.5	0	0	270	-8132.08	-8102.28	-31.6312	1.82762
frame_1659_x0.95_y0.77_z1.5_angle120.0_tilt0.0_tazi180.0	0.95	0.77	1.5	120	0	180	-8132.08	-8102.28	-31.6312	1.82762
frame_0229_x0.05_y0.77_z1.5_angle180.0_tilt0.0_tazi0.0	0.05	0.77	1.5	180	0	0	-8132.08	-8102.28	-31.6312	1.82762
frame_0231_x0.05_y0.77_z1.5_angle180.0_tilt0.0_tazi180.0	0.05	0.77	1.5	180	0	180	-8132.08	-8102.28	-31.6312	1.82762
frame_1669_x0.95_y0.77_z1.5_angle180.0_tilt0.0_tazi0.0	0.95	0.77	1.5	180	0	0	-8132.08	-8102.28	-31.6312	1.82762
frame_1647_x0.95_y0.77_z1.5_angle60.0_tilt0.0_tazi180.0	0.95	0.77	1.5	60	0	180	-8132.08	-8102.28	-31.6312	1.82762
frame_1645_x0.95_y0.77_z1.5_angle60.0_tilt0.0_tazi0.0	0.95	0.77	1.5	60	0	0	-8132.08	-8102.28	-31.6312	1.82762
frame_0193_x0.05_y0.77_z1.5_angle0.0_tilt0.0_tazi0.0	0.05	0.77	1.5	0	0	0	-8132.08	-8102.28	-31.6312	1.82762
frame_0195_x0.05_y0.77_z1.5_angle0.0_tilt0.0_tazi180.0	0.05	0.77	1.5	0	0	180	-8132.08	-8102.28	-31.6312	1.82762
frame_0205_x0.05_y0.77_z1.5_angle60.0_tilt0.0_tazi0.0	0.05	0.77	1.5	60	0	0	-8132.08	-8102.28	-31.6312	1.82762
frame_0172_x0.05_y0.59_z1.5_angle120.0_tilt0.0_tazi270.0	0.05	0.59	1.5	120	0	270	-8132.06	-8102.28	-31.6312	1.8519
frame_1609_x0.95_y0.59_z1.5_angle120.0_tilt0.0_tazi0.0	0.95	0.59	1.5	120	0	0	-8132.06	-8102.28	-31.6312	1.8519
frame_0181_x0.05_y0.59_z1.5_angle180.0_tilt0.0_tazi0.0	0.05	0.59	1.5	180	0	0	-8132.06	-8102.28	-31.6312	1.8519
frame_0171_x0.05_y0.59_z1.5_angle120.0_tilt0.0_tazi180.0	0.05	0.59	1.5	120	0	180	-8132.06	-8102.28	-31.6312	1.8519
frame_0184_x0.05_y0.59_z1.5_angle180.0_tilt0.0_tazi270.0	0.05	0.59	1.5	180	0	270	-8132.06	-8102.28	-31.6312	1.8519
frame_0158_x0.05_y0.59_z1.5_angle60.0_tilt0.0_tazi90.0	0.05	0.59	1.5	60	0	90	-8132.06	-8102.28	-31.6312	1.8519
frame_0159_x0.05_y0.59_z1.5_angle60.0_tilt0.0_tazi180.0	0.05	0.59	1.5	60	0	180	-8132.06	-8102.28	-31.6312	1.85191
frame_1587_x0.95_y0.59_z1.5_angle0.0_tilt0.0_tazi180.0	0.95	0.59	1.5	0	0	180	-8132.06	-8102.28	-31.6312	1.85191
frame_1600_x0.95_y0.59_z1.5_angle60.0_tilt0.0_tazi270.0	0.95	0.59	1.5	60	0	270	-8132.06	-8102.28	-31.6312	1.85191
frame_1612_x0.95_y0.59_z1.5_angle120.0_tilt0.0_tazi270.0	0.95	0.59	1.5	120	0	270	-8132.06	-8102.28	-31.6312	1.85191
frame_1588_x0.95_y0.59_z1.5_angle0.0_tilt0.0_tazi270.0	0.95	0.59	1.5	0	0	270	-8132.06	-8102.28	-31.6312	1.85191
frame_0160_x0.05_y0.59_z1.5_angle60.0_tilt0.0_tazi270.0	0.05	0.59	1.5	60	0	270	-8132.06	-8102.28	-31.6312	1.85191
frame_1598_x0.95_y0.59_z1.5_angle60.0_tilt0.0_tazi90.0	0.95	0.59	1.5	60	0	90	-8132.06	-8102.28	-31.6312	1.85191
frame_0169_x0.05_y0.59_z1.5_angle120.0_tilt0.0_tazi0.0	0.05	0.59	1.5	120	0	0	-8132.06	-8102.28	-31.6312	1.85191
frame_1586_x0.95_y0.59_z1.5_angle0.0_tilt0.0_tazi90.0	0.95	0.59	1.5	0	0	90	-8132.06	-8102.28	-31.6312	1.85191
frame_1599_x0.95_y0.59_z1.5_angle60.0_tilt0.0_tazi180.0	0.95	0.59	1.5	60	0	180	-8132.06	-8102.28	-31.6312	1.85191
frame_0146_x0.05_y0.59_z1.5_angle0.0_tilt0.0_tazi90.0	0.05	0.59	1.5	0	0	90	-8132.06	-8102.28	-31.6312	1.85191
frame_1585_x0.95_y0.59_z1.5_angle0.0_tilt0.0_tazi0.0	0.95	0.59	1.5	0	0	0	-8132.06	-8102.28	-31.6312	1.85191
frame_1597_x0.95_y0.59_z1.5_angle60.0_tilt0.0_tazi0.0	0.95	0.59	1.5	60	0	0	-8132.06	-8102.28	-31.6312	1.85191
frame_0182_x0.05_y0.59_z1.5_angle180.0_tilt0.0_tazi90.0	0.05	0.59	1.5	180	0	90	-8132.06	-8102.28	-31.6312	1.85191
frame_0157_x0.05_y0.59_z1.5_angle60.0_tilt0.0_tazi0.0	0.05	0.59	1.5	60	0	0	-8132.06	-8102.28	-31.6312	1.85191
frame_1623_x0.95_y0.59_z1.5_angle180.0_tilt0.0_tazi180.0	0.95	0.59	1.5	180	0	180	-8132.06	-8102.28	-31.6312	1.85191
frame_1622_x0.95_y0.59_z1.5_angle180.0_tilt0.0_tazi90.0	0.95	0.59	1.5	180	0	90	-8132.06	-8102.28	-31.6312	1.85191
frame_0145_x0.05_y0.59_z1.5_angle0.0_tilt0.0_tazi0.0	0.05	0.59	1.5	0	0	0	-8132.06	-8102.28	-31.6312	1.85191
frame_0170_x0.05_y0.59_z1.5_angle120.0_tilt0.0_tazi90.0	0.05	0.59	1.5	120	0	90	-8132.06	-8102.28	-31.6312	1.85191
frame_1611_x0.95_y0.59_z1.5_angle120.0_tilt0.0_tazi180.0	0.95	0.59	1.5	120	0	180	-8132.06	-8102.28	-31.6312	1.85191
frame_0183_x0.05_y0.59_z1.5_angle180.0_tilt0.0_tazi180.0	0.05	0.59	1.5	180	0	180	-8132.06	-8102.28	-31.6312	1.85191
frame_0148_x0.05_y0.59_z1.5_angle0.0_tilt0.0_tazi270.0	0.05	0.59	1.5	0	0	270	-8132.06	-8102.28	-31.6312	1.85191
frame_1624_x0.95_y0.59_z1.5_angle180.0_tilt0.0_tazi270.0	0.95	0.59	1.5	180	0	270	-8132.06	-8102.28	-31.6312	1.85191
frame_1610_x0.95_y0.59_z1.5_angle120.0_tilt0.0_tazi90.0	0.95	0.59	1.5	120	0	90	-8132.06	-8102.28	-31.6312	1.85191
frame_1621_x0.95_y0.59_z1.5_angle180.0_tilt0.0_tazi0.0	0.95	0.59	1.5	180	0	0	-8132.06	-8102.28	-31.6312	1.85191
frame_0147_x0.05_y0.59_z1.5_angle0.0_tilt0.0_tazi180.0	0.05	0.59	1.5	0	0	180	-8132.06	-8102.28	-31.6312	1.85191
frame_0403_x0.23_y0.41_z1.5_angle60.0_tilt30.0_tazi180.0	0.23	0.41	1.5	60	30	180	-8132.01	-8102.28	-31.6312	1.90214
frame_0427_x0.23_y0.41_z1.5_angle180.0_tilt30.0_tazi180.0	0.23	0.41	1.5	180	30	180	-8132.01	-8102.28	-31.6312	1.90214
frame_1265_x0.77_y0.41_z1.5_angle60.0_tilt30.0_tazi0.0	0.77	0.41	1.5	60	30	0	-8132.01	-8102.28	-31.6312	1.90214
frame_1277_x0.77_y0.41_z1.5_angle120.0_tilt30.0_tazi0.0	0.77	0.41	1.5	120	30	0	-8132.01	-8102.28	-31.6312	1.90214
frame_1289_x0.77_y0.41_z1.5_angle180.0_tilt30.0_tazi0.0	0.77	0.41	1.5	180	30	0	-8132.01	-8102.28	-31.6312	1.90214
frame_0415_x0.23_y0.41_z1.5_angle120.0_tilt30.0_tazi180.0	0.23	0.41	1.5	120	30	180	-8132.01	-8102.28	-31.6312	1.90214
frame_0391_x0.23_y0.41_z1.5_angle0.0_tilt30.0_tazi180.0	0.23	0.41	1.5	0	30	180	-8132.01	-8102.28	-31.6312	1.90214
frame_1253_x0.77_y0.41_z1.5_angle0.0_tilt30.0_tazi0.0	0.77	0.41	1.5	0	30	0	-8132.01	-8102.28	-31.6312	1.90215
frame_0580_x0.41_y0.05_z1.5_angle0.0_tilt0.0_tazi270.0	0.41	0.05	1.5	0	0	270	-8132	-8102.28	-31.6312	1.91345
frame_0577_x0.41_y0.05_z1.5_angle0.0_tilt0.0_tazi0.0	0.41	0.05	1.5	0	0	0	-8132	-8102.28	-31.6312	1.91345
frame_0879_x0.59_y0.05_z1.5_angle60.0_tilt0.0_tazi180.0	0.59	0.05	1.5	60	0	180	-8132	-8102.28	-31.6312	1.91345
frame_0892_x0.59_y0.05_z1.5_angle120.0_tilt0.0_tazi270.0	0.59	0.05	1.5	120	0	270	-8132	-8102.28	-31.6312	1.91345
frame_0590_x0.41_y0.05_z1.5_angle60.0_tilt0.0_tazi90.0	0.41	0.05	1.5	60	0	90	-8132	-8102.28	-31.6312	1.91345
frame_0589_x0.41_y0.05_z1.5_angle60.0_tilt0.0_tazi0.0	0.41	0.05	1.5	60	0	0	-8132	-8102.28	-31.6312	1.91345
frame_0867_x0.59_y0.05_z1.5_angle0.0_tilt0.0_tazi180.0	0.59	0.05	1.5	0	0	180	-8132	-8102.28	-31.6312	1.91345
frame_0891_x0.59_y0.05_z1.5_angle120.0_tilt0.0_tazi180.0	0.59	0.05	1.5	120	0	180	-8132	-8102.28	-31.6312	1.91345
frame_0889_x0.59_y0.05_z1.5_angle120.0_tilt0.0_tazi0.0	0.59	0.05	1.5	120	0	0	-8132	-8102.28	-31.6312	1.91346
frame_0604_x0.41_y0.05_z1.5_angle120.0_tilt0.0_tazi270.0	0.41	0.05	1.5	120	0	270	-8132	-8102.28	-31.6312	1.91346
frame_0616_x0.41_y0.05_z1.5_angle180.0_tilt0.0_tazi270.0	0.41	0.05	1.5	180	0	270	-8132	-8102.28	-31.6312	1.91346
frame_0603_x0.41_y0.05_z1.5_angle120.0_tilt0.0_tazi180.0	0.41	0.05	1.5	120	0	180	-8132	-8102.28	-31.6312	1.91346
frame_0579_x0.41_y0.05_z1.5_angle0.0_tilt0.0_tazi180.0	0.41	0.05	1.5	0	0	180	-8132	-8102.28	-31.6312	1.91346
frame_0890_x0.59_y0.05_z1.5_angle120.0_tilt0.0_tazi90.0	0.59	0.05	1.5	120	0	90	-8132	-8102.28	-31.6312	1.91346
frame_0880_x0.59_y0.05_z1.5_angle60.0_tilt0.0_tazi270.0	0.59	0.05	1.5	60	0	270	-8132	-8102.28	-31.6312	1.91346
frame_0868_x0.59_y0.05_z1.5_angle0.0_tilt0.0_tazi270.0	0.59	0.05	1.5	0	0	270	-8132	-8102.28	-31.6312	1.91346
frame_0613_x0.41_y0.05_z1.5_angle180.0_tilt0.0_tazi0.0	0.41	0.05	1.5	180	0	0	-8132	-8102.28	-31.6312	1.91346
frame_0904_x0.59_y0.05_z1.5_angle180.0_tilt0.0_tazi270.0	0.59	0.05	1.5	180	0	270	-8132	-8102.28	-31.6312	1.91346
frame_0865_x0.59_y0.05_z1.5_angle0.0_tilt0.0_tazi0.0	0.59	0.05	1.5	0	0	0	-8132	-8102.28	-31.6312	1.91346
frame_0866_x0.59_y0.05_z1.5_angle0.0_tilt0.0_tazi90.0	0.59	0.05	1.5	0	0	90	-8132	-8102.28	-31.6312	1.91346
frame_0578_x0.41_y0.05_z1.5_angle0.0_tilt0.0_tazi90.0	0.41	0.05	1.5	0	0	90	-8132	-8102.28	-31.6312	1.91346
frame_0614_x0.41_y0.05_z1.5_angle180.0_tilt0.0_tazi90.0	0.41	0.05	1.5	180	0	90	-8132	-8102.28	-31.6312	1.91346
frame_0615_x0.41_y0.05_z1.5_angle180.0_tilt0.0_tazi180.0	0.41	0.05	1.5	180	0	180	-8132	-8102.28	-31.6312	1.91346
frame_0877_x0.59_y0.05_z1.5_angle60.0_tilt0.0_tazi0.0	0.59	0.05	1.5	60	0	0	-8132	-8102.28	-31.6312	1.91346
frame_0591_x0.41_y0.05_z1.5_angle60.0_tilt0.0_tazi180.0	0.41	0.05	1.5	60	0	180	-8132	-8102.28	-31.6312	1.91346
frame_0592_x0.41_y0.05_z1.5_angle60.0_tilt0.0_tazi270.0	0.41	0.05	1.5	60	0	270	-8132	-8102.28	-31.6312	1.91346
frame_0601_x0.41_y0.05_z1.5_angle120.0_tilt0.0_tazi0.0	0.41	0.05	1.5	120	0	0	-8132	-8102.28	-31.6312	1.91346
frame_0878_x0.59_y0.05_z1.5_angle60.0_tilt0.0_tazi90.0	0.59	0.05	1.5	60	0	90	-8132	-8102.28	-31.6312	1.91346
frame_0602_x0.41_y0.05_z1.5_angle120.0_tilt0.0_tazi90.0	0.41	0.05	1.5	120	0	90	-8132	-8102.28	-31.6312	1.91346
frame_0903_x0.59_y0.05_z1.5_angle180.0_tilt0.0_tazi180.0	0.59	0.05	1.5	180	0	180	-8132	-8102.28	-31.6312	1.91346
frame_0901_x0.59_y0.05_z1.5_angle180.0_tilt0.0_tazi0.0	0.59	0.05	1.5	180	0	0	-8132	-8102.28	-31.6312	1.91346
frame_0902_x0.59_y0.05_z1.5_angle180.0_tilt0.0_tazi90.0	0.59	0.05	1.5	180	0	90	-8132	-8102.28	-31.6312	1.91346
frame_0258_x0.05_y0.95_z1.5_angle60.0_tilt30.0_tazi90.0	0.05	0.95	1.5	60	30	90	-8131.46	-8102.28	-31.6312	2.45282
frame_0246_x0.05_y0.95_z1.5_angle0.0_tilt30.0_tazi90.0	0.05	0.95	1.5	0	30	90	-8131.46	-8102.28	-31.6312	2.45282
frame_0270_x0.05_y0.95_z1.5_angle120.0_tilt30.0_tazi90.0	0.05	0.95	1.5	120	30	90	-8131.46	-8102.28	-31.6312	2.45282
frame_1686_x0.95_y0.95_z1.5_angle0.0_tilt30.0_tazi90.0	0.95	0.95	1.5	0	30	90	-8131.46	-8102.28	-31.6312	2.45282
frame_0282_x0.05_y0.95_z1.5_angle180.0_tilt30.0_tazi90.0	0.05	0.95	1.5	180	30	90	-8131.46	-8102.28	-31.6312	2.45282
frame_1710_x0.95_y0.95_z1.5_angle120.0_tilt30.0_tazi90.0	0.95	0.95	1.5	120	30	90	-8131.46	-8102.28	-31.6312	2.45282
frame_1698_x0.95_y0.95_z1.5_angle60.0_tilt30.0_tazi90.0	0.95	0.95	1.5	60	30	90	-8131.46	-8102.28	-31.6312	2.45283
frame_1722_x0.95_y0.95_z1.5_angle180.0_tilt30.0_tazi90.0	0.95	0.95	1.5	180	30	90	-8131.46	-8102.28	-31.6312	2.45283
frame_0236_x0.05_y0.77_z1.5_angle180.0_tilt30.0_tazi270.0	0.05	0.77	1.5	180	30	270	-8131.44	-8102.28	-31.6312	2.47256
frame_0224_x0.05_y0.77_z1.5_angle120.0_tilt30.0_tazi270.0	0.05	0.77	1.5	120	30	270	-8131.44	-8102.28	-31.6312	2.47256
frame_1664_x0.95_y0.77_z1.5_angle120.0_tilt30.0_tazi270.0	0.95	0.77	1.5	120	30	270	-8131.44	-8102.28	-31.6312	2.47256
frame_0200_x0.05_y0.77_z1.5_angle0.0_tilt30.0_tazi270.0	0.05	0.77	1.5	0	30	270	-8131.44	-8102.28	-31.6312	2.47256
frame_1652_x0.95_y0.77_z1.5_angle60.0_tilt30.0_tazi270.0	0.95	0.77	1.5	60	30	270	-8131.44	-8102.28	-31.6312	2.47256
frame_1676_x0.95_y0.77_z1.5_angle180.0_tilt30.0_tazi270.0	0.95	0.77	1.5	180	30	270	-8131.44	-8102.28	-31.6312	2.47256
frame_0212_x0.05_y0.77_z1.5_angle60.0_tilt30.0_tazi270.0	0.05	0.77	1.5	60	30	270	-8131.44	-8102.28	-31.6312	2.47256
frame_1640_x0.95_y0.77_z1.5_angle0.0_tilt30.0_tazi270.0	0.95	0.77	1.5	0	30	270	-8131.44	-8102.28	-31.6312	2.47256
frame_0679_x0.41_y0.41_z1.5_angle0.0_tilt30.0_tazi180.0	0.41	0.41	1.5	0	30	180	-8130.97	-8102.28	-31.6312	2.9359
frame_0715_x0.41_y0.41_z1.5_angle180.0_tilt30.0_tazi180.0	0.41	0.41	1.5	180	30	180	-8130.97	-8102.28	-31.6312	2.9359
frame_0989_x0.59_y0.41_z1.5_angle120.0_tilt30.0_tazi0.0	0.59	0.41	1.5	120	30	0	-8130.97	-8102.28	-31.6312	2.9359
frame_0977_x0.59_y0.41_z1.5_angle60.0_tilt30.0_tazi0.0	0.59	0.41	1.5	60	30	0	-8130.97	-8102.28	-31.6312	2.9359
frame_0703_x0.41_y0.41_z1.5_angle120.0_tilt30.0_tazi180.0	0.41	0.41	1.5	120	30	180	-8130.97	-8102.28	-31.6312	2.9359
frame_0691_x0.41_y0.41_z1.5_angle60.0_tilt30.0_tazi180.0	0.41	0.41	1.5	60	30	180	-8130.97	-8102.28	-31.6312	2.93591
frame_0965_x0.59_y0.41_z1.5_angle0.0_tilt30.0_tazi0.0	0.59	0.41	1.5	0	30	0	-8130.97	-8102.28	-31.6312	2.93591
frame_1001_x0.59_y0.41_z1.5_angle180.0_tilt30.0_tazi0.0	0.59	0.41	1.5	180	30	0	-8130.97	-8102.28	-31.6312	2.93591
frame_0999_x0.59_y0.41_z1.5_angle180.0_tilt0.0_tazi180.0	0.59	0.41	1.5	180	0	180	-8130.67	-8102.28	-31.6312	3.24064
frame_0976_x0.59_y0.41_z1.5_angle60.0_tilt0.0_tazi270.0	0.59	0.41	1.5	60	0	270	-8130.67	-8102.28	-31.6312	3.24064
frame_0997_x0.59_y0.41_z1.5_angle180.0_tilt0.0_tazi0.0	0.59	0.41	1.5	180	0	0	-8130.67	-8102.28	-31.6312	3.24064
frame_0962_x0.59_y0.41_z1.5_angle0.0_tilt0.0_tazi90.0	0.59	0.41	1.5	0	0	90	-8130.67	-8102.28	-31.6312	3.24064
frame_0675_x0.41_y0.41_z1.5_angle0.0_tilt0.0_tazi180.0	0.41	0.41	1.5	0	0	180	-8130.67	-8102.28	-31.6312	3.24064
frame_0961_x0.59_y0.41_z1.5_angle0.0_tilt0.0_tazi0.0	0.59	0.41	1.5	0	0	0	-8130.67	-8102.28	-31.6312	3.24064
frame_0711_x0.41_y0.41_z1.5_angle180.0_tilt0.0_tazi180.0	0.41	0.41	1.5	180	0	180	-8130.67	-8102.28	-31.6312	3.24064
frame_1000_x0.59_y0.41_z1.5_angle180.0_tilt0.0_tazi270.0	0.59	0.41	1.5	180	0	270	-8130.67	-8102.28	-31.6312	3.24064
frame_0974_x0.59_y0.41_z1.5_angle60.0_tilt0.0_tazi90.0	0.59	0.41	1.5	60	0	90	-8130.67	-8102.28	-31.6312	3.24064
frame_0699_x0.41_y0.41_z1.5_angle120.0_tilt0.0_tazi180.0	0.41	0.41	1.5	120	0	180	-8130.67	-8102.28	-31.6312	3.24064
frame_0985_x0.59_y0.41_z1.5_angle120.0_tilt0.0_tazi0.0	0.59	0.41	1.5	120	0	0	-8130.67	-8102.28	-31.6312	3.24064
frame_0697_x0.41_y0.41_z1.5_angle120.0_tilt0.0_tazi0.0	0.41	0.41	1.5	120	0	0	-8130.67	-8102.28	-31.6312	3.24064
frame_0676_x0.41_y0.41_z1.5_angle0.0_tilt0.0_tazi270.0	0.41	0.41	1.5	0	0	270	-8130.67	-8102.28	-31.6312	3.24064
frame_0685_x0.41_y0.41_z1.5_angle60.0_tilt0.0_tazi0.0	0.41	0.41	1.5	60	0	0	-8130.67	-8102.28	-31.6312	3.24064
frame_0998_x0.59_y0.41_z1.5_angle180.0_tilt0.0_tazi90.0	0.59	0.41	1.5	180	0	90	-8130.67	-8102.28	-31.6312	3.24064
frame_0964_x0.59_y0.41_z1.5_angle0.0_tilt0.0_tazi270.0	0.59	0.41	1.5	0	0	270	-8130.67	-8102.28	-31.6312	3.24064
frame_0700_x0.41_y0.41_z1.5_angle120.0_tilt0.0_tazi270.0	0.41	0.41	1.5	120	0	270	-8130.67	-8102.28	-31.6312	3.24064
frame_0710_x0.41_y0.41_z1.5_angle180.0_tilt0.0_tazi90.0	0.41	0.41	1.5	180	0	90	-8130.67	-8102.28	-31.6312	3.24064
frame_0986_x0.59_y0.41_z1.5_angle120.0_tilt0.0_tazi90.0	0.59	0.41	1.5	120	0	90	-8130.67	-8102.28	-31.6312	3.24064
frame_0988_x0.59_y0.41_z1.5_angle120.0_tilt0.0_tazi270.0	0.59	0.41	1.5	120	0	270	-8130.67	-8102.28	-31.6312	3.24064
frame_0973_x0.59_y0.41_z1.5_angle60.0_tilt0.0_tazi0.0	0.59	0.41	1.5	60	0	0	-8130.67	-8102.28	-31.6312	3.24064
frame_0674_x0.41_y0.41_z1.5_angle0.0_tilt0.0_tazi90.0	0.41	0.41	1.5	0	0	90	-8130.67	-8102.28	-31.6312	3.24064
frame_0687_x0.41_y0.41_z1.5_angle60.0_tilt0.0_tazi180.0	0.41	0.41	1.5	60	0	180	-8130.67	-8102.28	-31.6312	3.24064
frame_0709_x0.41_y0.41_z1.5_angle180.0_tilt0.0_tazi0.0	0.41	0.41	1.5	180	0	0	-8130.67	-8102.28	-31.6312	3.24064
frame_0686_x0.41_y0.41_z1.5_angle60.0_tilt0.0_tazi90.0	0.41	0.41	1.5	60	0	90	-8130.67	-8102.28	-31.6312	3.24064
frame_0688_x0.41_y0.41_z1.5_angle60.0_tilt0.0_tazi270.0	0.41	0.41	1.5	60	0	270	-8130.67	-8102.28	-31.6312	3.24064
frame_0712_x0.41_y0.41_z1.5_angle180.0_tilt0.0_tazi270.0	0.41	0.41	1.5	180	0	270	-8130.67	-8102.28	-31.6312	3.24064
frame_0673_x0.41_y0.41_z1.5_angle0.0_tilt0.0_tazi0.0	0.41	0.41	1.5	0	0	0	-8130.67	-8102.28	-31.6312	3.24064
frame_0698_x0.41_y0.41_z1.5_angle120.0_tilt0.0_tazi90.0	0.41	0.41	1.5	120	0	90	-8130.67	-8102.28	-31.6312	3.24064
frame_0987_x0.59_y0.41_z1.5_angle120.0_tilt0.0_tazi180.0	0.59	0.41	1.5	120	0	180	-8130.67	-8102.28	-31.6312	3.24064
frame_0963_x0.59_y0.41_z1.5_angle0.0_tilt0.0_tazi180.0	0.59	0.41	1.5	0	0	180	-8130.67	-8102.28	-31.6312	3.24064
frame_0975_x0.59_y0.41_z1.5_angle60.0_tilt0.0_tazi180.0	0.59	0.41	1.5	60	0	180	-8130.67	-8102.28	-31.6312	3.24064
frame_0702_x0.41_y0.41_z1.5_angle120.0_tilt30.0_tazi90.0	0.41	0.41	1.5	120	30	90	-8130.47	-8102.28	-31.6312	3.44175
frame_1002_x0.59_y0.41_z1.5_angle180.0_tilt30.0_tazi90.0	0.59	0.41	1.5	180	30	90	-8130.47	-8102.28	-31.6312	3.44175
frame_0978_x0.59_y0.41_z1.5_angle60.0_tilt30.0_tazi90.0	0.59	0.41	1.5	60	30	90	-8130.47	-8102.28	-31.6312	3.44175
frame_0714_x0.41_y0.41_z1.5_angle180.0_tilt30.0_tazi90.0	0.41	0.41	1.5	180	30	90	-8130.47	-8102.28	-31.6312	3.44175
frame_0690_x0.41_y0.41_z1.5_angle60.0_tilt30.0_tazi90.0	0.41	0.41	1.5	60	30	90	-8130.47	-8102.28	-31.6312	3.44175
frame_0678_x0.41_y0.41_z1.5_angle0.0_tilt30.0_tazi90.0	0.41	0.41	1.5	0	30	90	-8130.47	-8102.28	-31.6312	3.44175
frame_0990_x0.59_y0.41_z1.5_angle120.0_tilt30.0_tazi90.0	0.59	0.41	1.5	120	30	90	-8130.47	-8102.28	-31.6312	3.44175
frame_0966_x0.59_y0.41_z1.5_angle0.0_tilt30.0_tazi90.0	0.59	0.41	1.5	0	30	90	-8130.47	-8102.28	-31.6312	3.44175
